# Comparative reproductive biology of deep-sea ophiuroids inhabiting polymetallic-nodule fields in the Clarion-Clipperton Fracture Zone

1 Sven R Laming<sup>1\*</sup>, Magdalini Christodoulou<sup>2</sup>, Pedro Martinez Arbizu<sup>2</sup>, Ana Hilário<sup>1</sup>

2 <sup>1</sup>Centre for Environmental and Marine Studies (CESAM) & Department of Biology, University of  
3 Aveiro, 3810-193 Aveiro, Portugal

4 <sup>2</sup>German Centre for Marine Biodiversity Research (DZMB), Senckenberg am Meer, 26382  
5 Wilhelmshaven, Germany

6 \* **Correspondence:**  
7 Corresponding Author  
8 [slaming@ua.pt](mailto:slaming@ua.pt)

9

## 10 **Keywords:**

11 maturation, lecithotrophy, gonochoric, deep-sea mining, ecology, brittle stars, Ophiuroidea,  
12 Echinodermata

13

## 14 **Language preferences**

15 *The authors prefer the article to be formatted in 'British' English*

16

## 17 **Manuscript Length:**

18 6121 words, 9 Figures, 0 Tables

19

## 20 **Abstract**

21 Deep-sea mining in the Pacific Clarion-Clipperton Fracture Zone (CCZ), a low-energy sedimentary  
22 habitat with polymetallic nodules, is expected to have considerable and long-lasting environmental  
23 impact. The CCZ hosts extraordinarily high species diversity across representatives from all  
24 Domains of Life . Data on species biology and ecology remain scarce, however. The current study  
25 describes the reproductive biology of *Ophiosphalma glabrum* (Lütken & Mortensen, 1899)  
26 (*Ophiosphalmidae*) and *Ophiacantha cosmica* (Lyman, 1878) (*Ophiacanthidae*), two ophiuroids  
27 frequently found in the CCZ. Specimens collected in Spring 2015 and 2019 in four contract areas  
28 were examined morphologically and histologically. Size-class frequencies (disc diameter and oocytes  
29 feret diameters), sex ratios, gametogenic status, putative reproductive mode and a simple proxy for  
30 fecundity are presented. Habitat use differs in each. While *Ophiosphalma glabrum* is epibenthic,  
31 occurring as single individuals, *Ophiacantha cosmica* often form size-stratified groups living on  
32 stalked sponges, suggesting gregarious settlement or retention of offspring (though no brooding

33 individuals were found). Further molecular analyses are needed to establish whether *O.*  
34 *cosmica* groups are familial. In *Ophiosphalma glabrum*, for which sample sizes were larger, sex  
35 ratios approximated a 1:1 ratio with no size-structuring. In both species, individuals were at various  
36 stages of gametogenic maturity but no ripe females were identified. Based on this, *O. glabrum* is  
37 most probably gonochoric. Reproductive mode remains inconclusive for *Ophiacantha cosmica*. Both  
38 species are presumptively lecithotrophic, with vitellogenic-oocyte feret diameters exceeding 250  $\mu\text{m}$ .  
39 Oocyte feret diameters at times exceeded 400  $\mu\text{m}$  in *Ophiosphalma glabrum*, indicating substantial  
40 yolk reserves. Estimates of instantaneous fecundity (vitellogenic specimens of *O. glabrum* only) were  
41 confounded by interindividual variability in gonad characteristics. The well-furnished lecithotrophic  
42 larvae of *O. glabrum* would be capable of dispersing even under food-impoverished conditions. The  
43 current study examines ophiuroid reproductive biology over multiple localities in the CCZ  
44 concurrently for the first time, at sites characterised by differing productivity regimes. The  
45 reproductive biology of each species is thus discussed with reference to past evolutionary (habitat  
46 stability), contemporary (food supply) and future environmental drivers (potential impacts of deep-  
47 sea mining).

## 48 1 Introduction

49 The challenges of exploring remote deep-sea abyssal environments have, thus far, insulated the deep-  
50 sea benthos from the impacts of mineral resource extraction. However, the advent of the  
51 technological means to access and exploit the considerable mineral resources found in these  
52 environments (Ghosh and Mukhopadhyay, 2000), heralds imminent, unprecedented levels of  
53 disturbance in the deep-sea (Weaver et al., 2018). Fauna that have evolved under highly stable, food-  
54 limited environmental regimes are likely to be poorly adapted to large-scale disturbances that rapidly  
55 and/or irreversibly alter their environment (Stearns, 2000). The Clarion-Clipperton Fracture Zone  
56 (CCZ) in the tropical NE Pacific exemplifies this scenario, where the largest known global reserve of  
57 polymetallic nodules is located, formed over geological timescales in abyssal soft sediments  
58 characterized by very low sedimentation rates (Hein et al., 2013). Recent studies that have sought to  
59 describe the benthic fauna that typify the CCZ have also revealed extraordinarily high taxonomic  
60 diversity across representatives from all Domains of Life (e.g. Amon et al., 2016; De Smet et al.,  
61 2017; Shulse et al., 2017; Wilson, 2017; Hauquier et al., 2018; Goineau and Gooday, 2019; Brix et  
62 al., 2020; Christodoulou et al., 2020), making the CCZ of critical importance for biodiversity  
63 conservation. In many of these studies, data (e.g. species-abundance curves) strongly suggest that  
64 many – arguably most – species remain unaccounted for, with high species turnover over relatively  
65 short spatial scales even in groups that are brooders like Isopoda (e.g. Wilson, 2017, Brix et al.,  
66 2020). Remoteness of habitat and spatial variability in species composition of this sort present  
67 challenges for performing robust ecological studies, as evidenced by the scarcity of ecologically  
68 meaningful data available for even the most conspicuous ‘common’ epifaunal species in the CCZ  
69 (Danovaro et al., 2017), including many echinoderm species (Amon et al., 2016).

70 Members of the phylum Echinodermata represent some of the most biomass-dominant taxa found in  
71 deep-sea abyssal plains (Gage and Tyler, 1991). Echinoderms play a significant role in global marine  
72 carbon budget (Lebrato et al., 2010) and are abundant in many soft- and hard-substrate habitats  
73 globally (Gage and Tyler, 1991). The class Ophiuroidea are known to be particularly prevalent and  
74 diverse on bathyal slopes (e.g. O’Hara et al., 2008) but data concerning species diversity and  
75 abundances at abyssal depths are scarce by comparison (Stöhr et al., 2012). In the equatorial NE  
76 Pacific, such data is limited to select historic (e.g. HMS Challenger and Albatross expeditions,  
77 Lyman, 1878, 1879, 1882; Clark, 1911, 1949) and contemporary surveys (Amon et al., 2016;  
78 Vanreusel et al., 2016, Christodoulou et al., 2020). Drivers for large-scale regional variability in

79 abyssal ophiuroid population densities are still poorly understood; however, in the CCZ it seems that  
80 local-scale patchiness in nodule substrate availability plays a key role in determining the distribution  
81 of many species. Under certain habitat conditions, ophiuroids and the echinoderms more generally,  
82 comprise one of the largest components of mobile epifauna at nodule-rich sites (Amon et al., 2016;  
83 Vanreusel et al., 2016: up to 15 individuals per 100 m<sup>2</sup>, with major contributions from ophiuroids).  
84 The presence of nodules appears particularly relevant to certain ophiuroid and echinoid species; when  
85 nodules are absent, mobile epifaunal densities fall sharply to one or two encounters in an equivalent  
86 100 m<sup>2</sup> area, largely due to much-reduced encounters with ophiuroid species (Vanreusel et al., 2016).  
87 Two recent studies published in 2020, one based on video-transect surveys and the other on  
88 specimens collected by remotely operated vehicle (ROV) and epibenthic sled (EBS), have also  
89 identified ophiuroids in abundance and notably, at unexpectedly high levels of diversity in the  
90 easternmost regions of CCZ (Christodoulou et al., 2020; Simon-Lledó et al., 2020) with the discovery  
91 of previously unknown ancient lineages (Christodoulou et al., 2019, 2020).

92 Current knowledge of reproductive biology in abyssal ophiuroid species is limited to a few papers  
93 examining gametogenic and/or size-class patterns (e.g. *Ophiomusa lymani* in N Atlantic & NE  
94 Pacific, Gage, 1982; Gage and Tyler, 1982; *Ophiocten hastatum* in NE Atlantic, Gage et al., 2004;  
95 *Ophiura bathybia*, *Amphilepis patens*, *Amphiura carchara* and *Ophiacantha cosmica* in NE Pacific,  
96 Booth et al., 2008; *Ophiura irrorata loveni*, *Ophiura lienosa*, *Amphioplus daleus*, *Ophiacantha*  
97 *cosmica*, *Ophiernus quadrispinus* and *Ophioplexa condita* in S Indian Ocean, Billett et al., 2013),  
98 with no data available for specimens collected from polymetallic-nodule habitats. Two of the more  
99 frequently encountered ophiuroids within the eastern CCZ (Christodoulou et al., 2020) are the brittle  
100 stars *Ophiosphalma glabrum* Lütken & Mortensen, 1899 (Ophiosphalmidae) and *Ophiacantha*  
101 *cosmica* Lyman, 1878 (Ophiacanthidae). These two species make for an interesting comparative  
102 reproductive study due to their contrasting biology. *Ophiosphalma glabrum* is relatively large (35 –  
103 40 mm maximum disc diameters, Clark, 1911, 1913), epifaunal on soft sediments (0 – 2 mm burial,  
104 Amon et al., 2016; Glover et al., 2016; Christodoulou et al., 2019) and likely a generalist deposit  
105 feeder, as is the case in the closely related genus *Ophiomusium* (Pearson and Gage, 1984).  
106 *Ophiacantha cosmica*, by contrast, is considerably smaller (11 – 12 mm maximum disc diameters,  
107 Booth et al., 2008; Billett et al., 2013) and epizoic or epifaunal on hard substrata (Billett et al., 2013),  
108 where it filters feeds with its spinous arms (Pearson and Gage, 1984). Although reproductive data are  
109 currently not available for *Ophiosphalma glabrum*, a few data already exist for *Ophiacantha cosmica*  
110 in nodule-free habitats. These indicate that *O. cosmica* is probably both gonochoric and  
111 lecithotrophic (oocyte 30 – 560 µm in diameter in specimens from the Southern Indian Ocean, Billett  
112 et al., 2013), with seasonal fluctuations in body-size structure suggesting that specimens spawn in  
113 response to peaks in particulate organic-carbon (POC) flux (Booth et al., 2008).

114 As part of a wider concerted effort to address significant knowledge gaps in our ecological  
115 understanding of nodule-rich seabeds while this habitat remains relatively pristine, the current study  
116 describes the reproductive biology of the brittle stars *Ophiosphalma glabrum* Lütken & Mortensen,  
117 1899 (Ophiosphalmidae) and *Ophiacantha cosmica* Lyman, 1878 (Ophiacanthidae) in a nodule-rich  
118 environment, based on histological analyses of specimens collected from several mining-contract  
119 areas within the eastern CCZ.

120

## 121 2 Methodology

### 122 2.1 Sample collection, fixation, preservation and species identification

123 Specimens were collected during remotely operated vehicle transects (ROV Kiel 6000, GEOMAR,  
124 manipulator arm) undertaken over the course of two cruises in Spring 2015 and 2019 on the R/V  
125 Sonne in the eastern CCZ. Cruise SO239 (11 March – 30 April 2015) visited four contract areas and  
126 one Area of Particular Environmental Interest (APEI, 400 x 400 square-km protected areas assigned  
127 to each of nine presumptive ecological subregions of the CCZ). The 2015 samples in the current  
128 study originate from three of these contract areas where one or both of the species in the current  
129 study were found: BGR area (Federal Institute for Geosciences and Natural Resources, Germany);  
130 the southern IOM area (Interoceanmetal Joint Organization); and the easternmost GSR area (G-TEC  
131 Sea Mineral Resources NV, Belgium), where each was located along a decreasing SE-to-NW POC  
132 gradient, concomitant with a decrease in surface primary productivity driven by basin-scale  
133 thermocline shoaling towards the N. Pacific subtropical gyre (Pennington et al., 2006). The 2019  
134 samples from the follow-up cruise SO268 (18 Feb – 21 May), originated from BGR (again) and the  
135 central GSR contract area (2015-2019 site separation: BGR ~ 50 km; GSR ~ 350 km). A site map is  
136 provided in Figure 1.

137

138 Following collection, the arms of each specimen were removed for molecular species identification,  
139 while the central disc was fixed for reproductive histology. Arm fixation was in pre-cooled 96%  
140 EtOH, with replacement after 24 h (stored at -20 °C thereafter); disc fixation was in 4% phosphate-  
141 buffered formaldehyde (48 h) following by serial transfer to 70% ethanol, stored at room  
142 temperature. Specimens were later identified to species level based on morphological characteristics  
143 (*Ophiosphalma glabrum*: Lütken and Mortensen, 1899; Baker, 2016; *Ophiacantha cosmica*: Lyman,  
144 1878; Paterson, 1985), supported by mtDNA COI analyses of genomic DNA extracted from arm  
145 tissues, described in detail in Christodoulou et al. (2020).

146

## 147 **2.2 Size measurements, dissection and tissue preparation for microscopy**

148 Micrographs of the oral and aboral faces of central discs were created from focus-stacks taken under  
149 a stereomicroscope (Leica M125 and DMC5400 camera, LAS- Leica Application Suite 3.7; focus-  
150 stacking in Combine ZP 1.0). Disc diameter – the length from the radial shield's distal edge to the  
151 opposing interradial margin (Gage and Tyler, 1982) – was measured in LAS, to estimate size at first  
152 maturity and assess size-class frequencies as a function of sex. The aboral face, stomach and bursa  
153 lining were then removed by dissection to reveal the bursal slits that border each arm base, along  
154 which the sac-like gonads are located, arranged in rows on each side. Intact gonad rows were  
155 dissected and then embedded either in paraffin wax or plastic resin, depending on tissue size. An  
156 additional decalcification step in 3% nitric acid in 70% ethanol (Wilkie, 2016) followed by a 70%  
157 ethanol rinse was required for smaller gonads, which were retained on a fragment of calcified tissue  
158 to facilitate tissue processing.

159 Larger gonad samples (all *Ophiosphalma glabrum* specimens and one *Ophiacantha cosmica*  
160 specimen with larger gonads) were infiltrated in molten paraffin at 60 °C, following 6-step serial  
161 transfer to 100% ethanol, 4-step transfer to 100% MileGREEN™ (an iso-paraffin based solvent,  
162 Milestone) and final 2-step transfer to paraffin in a mould to set. Blocks were trimmed and 5- $\mu$ m  
163 sections cut, relaxed in a water bath, placed on Superfrost™+ slides and dry-fixed by incubation at  
164 50 °C. Slides were stained in (Harris') Haematoxylin & Eosin(-Y) following standard protocols with  
165 dehydration by replacement using ethanol. Note that the *O. cosmica* specimen processed using  
166 paraffin wax was also processed with LR white resin (protocol below) using neighbouring gonads, to  
167 identify any procedural biases in oocyte feret diameter.

168 Smaller tissue samples (all *O. cosmica* specimens) were blotted dry and then infiltrated directly in a  
169 hydrophilic methacrylate resin (LR white, London Resin Co.) at room temperature (3 resin  
170 replacements by micropipette, 30- mins. each, 4th overnight) then transferred to a fresh resin-filled  
171 gelatine capsule (size 00, Electron Microscopy Sciences, UK), which was capped and polymerised at  
172 50 °C (20+ hrs). Having removed gelatine, LR-white resin pellets were trimmed and wet-sectioned  
173 on a Leica Ultracut UC6 Ultramicrotome (Germany), using a 45° glass knife. Sections 1-µm thick  
174 were transferred to individual aliquots arranged on Superfrost™+ slides. Periodic toluidine staining  
175 tracked progress through tissue. Standard H & E staining was modified by extending staining times  
176 and excluding ethanol, which distorts LR white. Slides were dried at 50 °C with a desiccant (see  
177 Laming et al., 2020 for details). Regardless of protocol, sections were then cleared in MileGREEN™  
178 and mounted with a cover slip (Omnimount™, Electron Microscopy Sciences).

### 179 2.3 Gametogenic analyses

180 Stained serial sections were photographed under a compound microscope (Leica DM2500 with  
181 camera module ICC50W, LAS 3.7). Spermatogenesis was documented qualitatively only. Oogenesis  
182 was examined in more detail. Oocyte size frequencies were determined by image analysis of serial  
183 sections from ovaries, imported as image-stacks into Image-J (Schindelin et al., 2012) to track  
184 individual oocytes through the sample and prevent repeat counting. Up to 100 oocytes (with visible  
185 nuclei only) were counted per specimen, each measured along its longest axis (feret diameter) and  
186 classified into oogenic developmental stages, based on the presumption that germinal vesicle  
187 breakdown, GVBD, precedes oocyte release (Adams et al., 2019). Stages were: 1) *Previtellogenic*  
188 oocytes (Pv), smallest oocytes with no clear evidence of a germinal vesicle or vitellogenesis (i.e.  
189 eosinophilic granulated cytoplasm, rich in yolk proteins, has not yet developed); 2) *Vitellogenic I*  
190 (VI), “early” vitellogenic oocytes that are less than twice the diameter of previtellogenic oocytes,  
191 with the beginnings of an eosinophilic cytoplasm and a distinct germinal vesicle; 3) *Vitellogenic II*  
192 (VII), “mid-stage” vitellogenic oocytes that clearly possess an eosinophilic granulated cytoplasm, but  
193 whose diameter is less than double that of the germinal vesicle; 4) *Vitellogenic III* (VIII), “late”  
194 vitellogenic oocytes with large eosinophilic cytoplasmic reserves, whose diameter exceeds double  
195 that of the germinal vesicle; 5) *Asymmetric* (As), late vitellogenic oocytes with germinal vesicles  
196 located asymmetrically and in contact with the cell membrane, the precursor to germinal vesicle  
197 breakdown (GVBD) and onset of meiosis I; 6) *Polar bodies* (PB), oocytes that have undergone  
198 GVBD, with evidence of peripheral polar bodies, germinal vesicle lacking; and 7) *Mature* (M), fully  
199 mature oocytes, possessing only a small pronucleus (after Wessel et al., 2004).

200 Overall state of gonad maturity was assessed visually in terms of gonad aspect within the bursa and  
201 histological appearance. Gonad state was either defined as “immature” (no gonad), “no gametes”  
202 (gonad but no gametogenesis), “developing” (gametogenesis at all stages of development but with  
203 interstitial spaces remaining, equivalent to stages I and II in Tyler, 1977), “nearly ripe” (late-stage  
204 gametes dominate – spermatozoa in males or *VIII-to-Mature*, denoted here as “VIII<sub>plus</sub>” in females –  
205 but gonad is not yet replete, equivalent to stage III in Tyler, 1977), “ripe” (fully mature gametes and  
206 no interstitial space, equivalent to stage IV in Tyler, 1977) and “post-spawning / recovery” (some  
207 residual near-mature gametes remain alongside degraded material, epithelial and myoepithelial layers  
208 are thickened and nutritive phagocytes are typically present, equivalent to stages V in Tyler, 1977).  
209 For *Ophiophalma glabrum*, the percentage area occupied by oocytes relative to gonad area and a  
210 maturity stage index (MSI) were also calculated, the latter using the 4<sup>th</sup> formula proposed from  
211 Doyle, Hamel and Mercier (2012):  $Oocyte\ density \times Size\ of\ individual^{-1} \times Oocyte\ surface\ area \times$   
212  $0.01$ , where oocyte density in the current study refers to oocytes mm<sup>-2</sup> of all gonads in cross section,

213 size of individual is disc diameter in mm (whose reciprocal value compensates for any size bias) and  
214 oocyte surface area is derived from the mean feret diameter ( $\frac{1}{4}\pi d^2$ ).  
215

## 216 2.4 Statistical analyses

217 Sex ratios for each species were assessed by  $\chi^2$  test. The statistical significance of rank-based  
218 differences was tested by Kruskal-Wallis H test for: 1) disc diameter as a function of sex (including a  
219 juvenile category); 2) oocyte feret diameter as a function of year, and of disc diameter (for a given  
220 visual gonad state) and; 3) percentage gonad occupied by oocytes, MSI and mean oocyte feret  
221 diameter each as a function of visual gonad state. Post-hoc pairwise comparisons were by Dunn test.  
222 To assess whether a trade-off exists between oocyte diameter and oocyte density (and thus,  
223 fecundity), a Spearman rank-order correlation was used to assess the strength of any proportional  
224 relationship between oocyte density and mean oocyte feret diameter. Expressions of variation around  
225 average values are standard deviation (sd., for means) and median absolute deviation (mad., for  
226 medians). All statistical and graphical analyses were performed in R 4.0.3 (R Core Team, 2020)<sup>1</sup>,  
227 using packages *svglite*, *tidyverse*, *cowplot*, *ggExtra* and *ggpubr* (Attali and Baker, 2019; Wickham et  
228 al., 2019, 2020; Kassambara and Kassambara, 2020; Wilke, 2020), with figures prepared in Inkscape  
229 1.0.2 (Inkscape Project)<sup>2</sup>.

## 230 3 Results

### 231 3.1 Sex ratios, size-class frequencies and size at first maturation

232 A total of seventy-six *Ophiosphalma glabrum* individuals (22 in 2015, 54 in 2019) and twenty-three  
233 *Ophiacantha cosmica* individuals (8 in 2015, 15 in 2019) were processed. Molecular analyses of the  
234 arms of specimens in the current study used for species' confirmation in a subset of individuals have  
235 been compiled into dedicated DOI-indexed dataset containing accession codes (Genbank), BOLD  
236 IDs and photos, trace files and collection data and specimen metadata (<http://dx.doi.org/10.5883/DS-CCZ4>). Of the two species, *Ophiosphalma glabrum* was larger (across entire sampling area, mean  
238 disc diameter  $16.0 \pm \text{sd. } 4.02$  vs. *Ophiacantha cosmica* mean disc diameter  $4.9 \pm \text{sd. } 2.03$ , example  
239 specimens in Figure 2). Diameters ranged from 5.7 – 25.2 mm in *O. glabrum* and 2.2 – 10.0 mm in  
240 *Ophiacantha cosmica*. Although male *Ophiosphalma glabrum* specimens were numerically dominant  
241 (39 vs. 25 individuals), overall sex ratios did not differ significantly from a 1:1 ratio ( $\chi^2_1 = 3.06$ ,  $p >$   
242  $0.05$ ). The three intermediate size classes for *O. glabrum* (together ranging from 12.5 – 20 mm) were  
243 characterised by equal numbers of males and females; however, smaller and larger mature *O.*  
244 *glabrum* individuals outside these size classes were exclusively male (Figure 3). Ranked-disc  
245 diameters did not significantly differ between sexes in *O. glabrum*, only between mature  
246 (male/female) and immature specimens, resulting in significant global differences across the three  
247 categories when immature specimens were included in analyses (Kruskal-Wallis  $\chi^2_2 = 31.39$ ,  $p <$   
248  $0.01$ , Figure 3). Sample sizes were particularly small for specimens of *Ophiacantha cosmica*. Despite  
249 this, due to an over-whelming dominance of females (7:1) sex ratios were found to be significantly  
250 different ( $\chi^2_1 = 4.50$ ,  $p < 0.05$ ). The only male *O. cosmica* collected was the largest individual of this  
251 species, making statistical comparisons of disc diameter between sexes impossible.

---

<sup>1</sup> <https://www.R-project.org/>

<sup>2</sup> <https://inkscape.org>

252 For both species, several immature specimens were retrieved (Figures 2 and 3), allowing rough  
253 estimates of size at first maturity to be made. In *Ophiosphalma glabrum*, the largest immature  
254 specimen (lacking discernible gonads) had an 11.93-mm wide disc; a further 11 smaller specimens  
255 also lacked gonads. The smallest *O. glabrum* individual that possessed a gonad was a male at 12.07  
256 mm disc diameter, while the smallest female was 14.14 mm (gametogenesis observed in both),  
257 placing approximate sizes at first maturity in males at < 12 mm disc diameter and at < 14.2 mm disc  
258 diameter in females. In *Ophiacantha cosmica*, size at first maturity is less concrete. The largest  
259 specimen with no discernible gonad had a disc diameter of 5.12 mm, with two smaller (4.28, 4.34  
260 mm) and two larger (6.00, 7.04 mm) specimens each in possession of 1 – 2 very small gonad buds  
261 (ca. 100 $\mu$ m diameter) not yet furnished with gametes. The smallest individual in which  
262 gametogenesis was identified was a female of 4.96 mm with six larger females with disc diameters of  
263 5.37 – 7.88 mm (Figure 3, select specimens in Figure 2). The largest individual – the only *O. cosmica*  
264 male – had a 9.98-mm wide disc.

### 265 3.2 Gonad state and gametogenesis

266 Gonad state and gametogenesis were assessed qualitatively in males (Figure 4 and 5) and both  
267 qualitatively and semi-quantitatively in females (Figures 4, 5 and 6). No evidence of simultaneous or  
268 sequential hermaphroditism (i.e., ovotestes / sex-specific size stratification) were identified in either  
269 species. Most *Ophiosphalma glabrum* males' testes were *developing* (49 %) with easily identifiable  
270 spermatogenic columns, composed of progressively more-advanced stages of spermatogenesis,  
271 extending from the inner-sac membrane into the central lumen (Figure 4a). Testes were somewhat  
272 angular (Figure 4g), lacking the creamy engorged appearance typical of ripe individuals (example in  
273 Figure 4h). A further 35 % were considered *nearly ripe*, where testes aspect appears unchanged but  
274 spermatogenic columns are no longer clearly visible, with roughly equal proportions of central  
275 mature spermatozoa, and surrounding tightly packed cells at earlier stages of spermatogenesis. Three  
276 specimens were *ripe* (8 %), where gonads appear engorged, extensively spread throughout bursae and  
277 replete with spermatozoa (Figure 4b, h). Putative evidence of nutritive phagocytes was used as the  
278 basis for discriminating a minority of male specimens as being in a *post-spawn / recovery* state (8 %,  
279 Figure 4 c, with gonad aspect in i). The single *Ophiacantha cosmica* male collected was at the  
280 *developing* stage, with evident spermatogenic columns (Figure 5a).

281 No *ripe* females were identified in either species. However, most *Ophiosphalma glabrum* females  
282 had ovaries in a *nearly ripe* state (56 % overall, 100 % in 2015, 39 % in 2019), where VIII<sub>plus</sub> oocytes  
283 dominate but the ovary is not replete and has not yet spread far into the bursa (e.g. Figure 4e, k). A  
284 further 33 % of individuals in *post-spawn / recovery* and 27 % with *developing* ovaries (see Figure  
285 4d and f) were also identified, all in 2019. All-but-one of the *Ophiacantha cosmica* females were  
286 *developing* (e.g., Figure 5b). The smallest female was in a *post-spawn / recovery* state (or possibly  
287 *developing* for the first time).

288 Oocytes at every stage of oogenesis were identified in *Ophiosphalma glabrum* (Figure 6a, b and c).  
289 Maximum oocyte feret diameters for *Ophiosphalma glabrum* and *Ophiacantha cosmica* were a  
290 mature oocyte of 453  $\mu$ m and VIII oocyte of 273  $\mu$ m, respectively. However, unlike *Ophiosphalma*  
291 *glabrum*, oocytes at stages more advanced than VIII were not observed in *Ophiacantha cosmica*  
292 generally (Figure 6d and e), so it is likely that maximum oocyte diameters in this species are  
293 underestimated. The higher proportion of *nearly ripe* *Ophiosphalma glabrum* females in 2015 versus  
294 2019, is reflected in significant differences in ranked oocyte feret diameters between 2015 and 2019  
295 (Kruskal-Wallis  $\chi^2_1 = 63.5$ ,  $p < 0.0001$ ). These differences, echoed by mean and median oocyte feret  
296 diameters for each year (2015- mean 159.1  $\pm$  sd. 91.7, median 149.5  $\pm$  mad. 109.0; and 2019- mean

297 112.0 ± sd. 78.3, median 88.0 ± mad. 57.8), relate to higher frequencies of VIII<sub>plus</sub> oocytes in the  
298 ovaries of specimens from 2015, clearly visible in the size-frequency data for both years (Figure 6b).  
299 Unfortunately, low sample sizes prohibit the quantitative comparison of oocyte frequency  
300 distributions as a function of contract area. That said, the proportion of large, late-stage oocytes  
301 found in specimens at the eastern-most sites appears higher (particularly for 2019, Figure 5c). No  
302 significant differences in ranked oocyte feret diameters between the two sampling years was found  
303 for *Ophiacantha cosmica* (Kruskal-Wallis  $\chi^2_1 = 2.34$ ,  $p > 0.05$ ), with similar oocyte size-class means,  
304 medians and distribution profiles identified for this species in both years (2015- mean 82.3 ± sd. 40.7,  
305 median 79.1 ± mad. 43.7; and 2019- mean 94.4 ± sd. 40.0, median 90.8 ± mad. 39.3; profiles in  
306 Figure 6e), though very low sampling sizes are likely undermining the statistical power of the test.

307 In addition to classifying oogenic stage and measuring oocyte feret diameters, the cross-sectional  
308 area occupied by oocytes relative to gonad area (inner-sac membrane) was calculated for  
309 *Ophiosphalma glabrum* – where tissue section quality allowed – as a proxy for the degree to which  
310 female gonads were full. A maturity stage index (MSI) previously demonstrated to be more sensitive  
311 to subtle changes in gonad maturation (Doyle et al., 2012), was also calculated for *O. glabrum*.  
312 Percentage of gonad occupied by oocytes (Kruskal-Wallis  $\chi^2_2 = 11.37$ ,  $p < 0.01$ ), mean oocyte feret  
313 diameter (Kruskal-Wallis  $\chi^2_2 = 10.55$ ,  $p < 0.01$ ) and MSI (Kruskal-Wallis  $\chi^2_2 = 9.13$ ,  $p < 0.05$ ) all  
314 differed significantly as a function of *O. glabrum* gonad state (Figure 7). Evident differences existed  
315 in MSI and in the relative gonad area occupied by oocytes in *nearly ripe* females; however, these  
316 metrics both failed to resolve differences between *developing* and *post-spawn* females, with post-hoc  
317 pairwise comparisons revealing significant group differences only between *nearly ripe* females and  
318 the two other gonad states (Figure 7). Group differences in mean oocyte feret diameter were  
319 restricted to *nearly ripe* females and those classified as *post-spawn / recovery* (Figure 6), reflecting  
320 similar (non-significant) mean feret diameters between *developing* and *nearly ripe* *O. glabrum*  
321 females. Spearman-rank correlative analysis revealed oocyte density mm<sup>-2</sup> of gonad cross-sectional  
322 area to be significantly, inversely related to mean oocyte feret diameter (coefficient  $R = -0.74$ ,  $p <$   
323  $0.0001$ , Figure 7) indicating a trade-off between investment per oocyte (i.e., size of yolk reserves)  
324 and the space available to house oocytes in each gonad.

325 Finally, intraindividual variation in the number and size of ovaries and oocyte densities per ovary in  
326 *O. glabrum* was considerable. Several *developing* females possessed neighbouring gonads at  
327 different stages of maturity based on visual aspect (e.g. Figure 4j). The presence of oocytes at various  
328 stages of oogenesis resulted in large variability in oocyte diameters (Figure 8), with large variances  
329 around median values (Supplementary figure 1). Not unexpectedly – since one directly informed the  
330 other – the proportion of oocytes at each stage of oogenesis was relatively consistent in a given  
331 gonad state, irrespective of specimen size (Figure 8). However, ranked oocyte feret diameters overall  
332 were significantly higher in the largest *nearly ripe* disc-diameter size class, 17.5 – <20 mm, when  
333 compared with smaller size classes 12.5 – <15 mm and 15 – <17.5 mm (based on post-hoc  
334 comparisons, following a highly significant Kruskal-Wallis test for gonad state: Kruskal-Wallis  $\chi^2_2 =$   
335  $18.94$ ,  $p < 0.0001$ , Supplementary figure 1). Significant post-hoc differences in ranked oocyte feret  
336 diameters were also identified across size classes in individuals in a state of *post-spawn / recovery*  
337 (Kruskal-Wallis  $\chi^2_2 = 12.63$ ,  $p < 0.01$ ), due to the relative dominance of previtellogenic oocytes in  
338 one individual from the intermediate 15 – <17.5 mm size category for this gonad state (Figure 8). No  
339 significant size-related differences were identified in the oocyte feret diameters of *developing*  
340 individuals of either species.

341 As a result of intra- and interindividual variability in gonad maturity overall, a reliable measure of  
342 fecundity proved impossible. However, extrapolating from 25µm of tissue sectioned per individual,



343 late-stage (VIII<sub>plus</sub>) oocyte counts mm-sectioned<sup>-1</sup> ovary<sup>-1</sup> ranged from 1.3 – 12.0 oocytes in  
344 *developing* females (n = 4), 5.0 – 30.0 oocytes mm-sectioned<sup>-1</sup> ovary<sup>-1</sup> in *nearly ripe* females (n =  
345 14) and 1.5 – 5.0 oocytes mm-sectioned<sup>-1</sup> ovary<sup>-1</sup> in *post-spawn / recovery* females (n = 2).

346

#### 347 4 Discussion

348 The current study provides new ecologically relevant reproductive data for two species of ophiuroid  
349 living in an oligotrophic, highly stable low-energy environment in the NE equatorial abyss which,  
350 due to the presence of polymetallic nodules, is under future threat from deep-sea mining activities  
351 (Weaver et al., 2018). The current study documents the reproductive biology of *Ophiosphalma*  
352 *glabrum* for the first time. Equal sex ratios for intermediate modal disc-diameter size classes and the  
353 absence of any simultaneous hermaphrodites both point to gonochorism in *O. glabrum*.  
354 Unfortunately, the manner (and possibly timing) of sampling may have created biases in the size  
355 classes of each sex. Large (and ripe) females (i.e., > 20-mm disc diameters) were conspicuously  
356 absent, suggesting either an unlikely upper limit on female disc diameter, or most probably, that large  
357 females were overlooked. This may simply be symptomatic of a patchy (or sex-specific) species  
358 distributions, where large communal echinoderm aggregations in the soft-sediment abyss only really  
359 occur during the episodic arrival of labile organic matter to the seafloor (Kuhnz et al., 2014; Smith et  
360 al., 2018) or during aggregative spawning events (Mercier and Hamel, 2009).

361 Oocyte feret diameters frequently exceeding 300 µm in the current study (max 453 µm in a mature  
362 oocyte) are indicative of a lecithotrophic (non-feeding) larval mode with substantial yolk-protein and  
363 lipid reserves (Sewell and Young, 1997; Young, 2003). Although this places an upper limit on  
364 transport time relative to planktotrophy, lecithotrophy releases larvae of nutritional constraints that  
365 likely exist in food-impovertished transport environments. In addition, if lecithotrophic dispersal  
366 occurs in deep waters where temperatures remain relatively low, this can act to extend transport times  
367 through metabolic suppression, with capacities for dispersal equivalent to planktotrophy (Mercier et  
368 al., 2013). Planktotrophic (feeding) larvae, by contrast, would be confined to water masses with  
369 higher detrital input (Young et al., 1997). Lecithotrophy necessitates greater energy investment per  
370 oocyte than in planktotrophy. This likely places constraints on fecundity in a food-limiting  
371 environment (Ramirez Llodra, 2002), as evidenced by the inverse relationship between oocyte  
372 densities and feret diameter in the current study. Ovaries in the current study, when *nearly ripe*, were  
373 classified as such based mainly on oogenic characteristics, since striking external indications of  
374 maturity were lacking in female specimens. Coloration was inconsistent and ovaries were not  
375 engorged, nor had they spread extensively into the bursae, as was witnessed in at least one ripe male.  
376 This indicates considerable scope remained for further reproductive investment in the females  
377 collected, under suitable environmental conditions. Without ripe females and intra- and interannual  
378 time-series sampling it is not possible to ascertain whether gametogenesis is seasonal (Tyler and  
379 Gage, 1980; Gage and Tyler, 1982) or aperiodic ('continuous'), though the presence of all oogenic  
380 stages in most specimens suggests aperiodic or semi-continuous spawning behaviour (Brogger et al.,  
381 2013). Oocyte size-class data also appear to suggest that slight differences exist between 2015 and  
382 2019, with a higher proportion of females approaching maturity in 2015. This could reflect the  
383 slightly different timing of cruises, as no *post-spawn recovery* females were found in 2015 or site-  
384 related differences for each year since site locations were not the same. Further data are necessary to  
385 confirm this.

386 In an oligotrophic environment lacking strong seasonal fluctuations in POC flux, apparent aperiodic  
387 (or ‘continuous’) gametogenesis may arise in species that spawn 1) periodically, but histological  
388 studies fail to identify their cyclical nature (Mercier et al., 2007; Mercier and Hamel, 2008) or 2)  
389 opportunistically, occurring in rapid response to increased food supply related to episodic massive  
390 changes in surface productivity and as such, remain undetected (Mercier and Hamel, 2009). Coupled  
391 with lecithotrophy, aperiodic opportunistic spawning would be resource-driven, allowing a species to  
392 respond to fluctuating food availability by investing in gametogenesis only when suitable conditions  
393 arise (e.g., Booth et al., 2008). Responsive reproductive modes of this sort appear to be a feature of  
394 bathyal and abyssal ecosystems in the tropical NE Pacific (Kuhnz et al., 2014; Smith et al., 2018)  
395 where the influences of episodic disturbance events are of greater influence than seasonal changes in  
396 surface productivity. However, additional sampling from highly oligotrophic NW regions of the  
397 CCZ (e.g. APEI 3, Vanreusel et al., 2016; Christodoulou et al., 2020) would be needed to establish  
398 whether lower POC flux translates into reduced energetic investment in reproduction.

399 Maximum sizes recorded for *O. glabrum* vary considerably in the literature but the largest attributed  
400 to this species is a 35 mm disc diameter (Clark, 1913), though there exists an *Ophiomusium*  
401 *multispinum* specimen – now synonymised with *O. glabrum* – with a 40-mm wide disc (Clark, 1911).  
402 In either case, the largest individual in the current study falls considerably short of these sizes, at 25.2  
403 mm. Aside from some concerns around species assignment in historical samples and difficulties in  
404 collecting representative samples of species that occur at low densities in expansive and remote  
405 environments, these larger specimens also originate from shallower habitats (e.g. Cocos, Malpelo and  
406 Carnegie Ridge, Panama Basin, depths 800 – 3200 m, Clark, 1911, 1913), where greater food  
407 availability arriving from productive coastal systems (Pennington et al., 2006) could enable larger  
408 maximum sizes. Although smaller specimens were undoubtedly underrepresented, enough immature  
409 *O. glabrum* were collected to establish a rough size at first maturity of < 12 mm, around 30 - 35 %  
410 maximum size. Without knowledge of growth rates, the time taken to reach these sizes remains  
411 unknown; however, if measures of growth (e.g. Gage et al., 2004) or temporal size-class frequency  
412 analyses can be compiled in future studies, this value could be easily converted to an estimate of age  
413 at first maturity, a highly relevant conservation metric for response to disturbance.

414 Sample sizes for the smaller species *Ophiacantha cosmica* limit any detailed interpretation of their  
415 reproductive biology. However, some data on size-class distributions and oocyte feret diameters  
416 already exist for this species from nodule-free habitats at Station M in the NE Pacific and around  
417 Crozet Island in the Southern Indian Ocean (Booth et al., 2008; Billett et al., 2013). Although sex  
418 ratios were significantly different in the current study, little stock can be placed in this result as the  
419 total number of mature specimens numbered less than ten and maximum disc diameters for both  
420 sexes are markedly lower than in the literature. Evidence from other studies indicate that sex ratios  
421 follow a 1:1 ratio when sampled in larger numbers (Billett et al., 2013), with maximum disc  
422 diameters of 11 – 12 mm (Booth et al., 2008; Billett et al., 2013; M. Christodoulou, personal  
423 observations), although the disc diameter for this species’ holotype is unaccountably large, at 18 mm  
424 (Lyman, 1878). Maximum oocyte feret diameter in the current study (VIII oocyte at 273 µm) also  
425 appears to be underestimated, when compared with those of specimens from the Crozet Plateau  
426 (Billett et al., 2013), which reached maximum feret diameters exceeding 500 µm, indicating  
427 lecithotrophy (or direct development, though no evidence of brooding has ever been recorded, Billett  
428 et al., 2013; this study). This is to be expected as females in the current study were relatively small by  
429 comparison and only in *developing* states, with no oocytes in the final stages of meiosis (i.e.,  
430 *asymmetric* or later). The only individual classified as *post-spawn / recovery* was probably  
431 developing for the first time, particularly in light of its small disc diameter. Unlike the protandric  
432 hermaphrodite *Ophiacantha fraterna* (Tyler and Gage, 1982; species identification updated from

433 *Ophiacantha bidentata* by Martynov and Litvinova, 2008), data from the current study –  
434 corroborated by that of Billett et al. (2013) – indicate that *O. cosmica* is gonochoric. However, the  
435 current study lacks sufficient data to confirm whether *O. cosmica* is also iteroparous, as is the case  
436 for *Ophiacantha fraterna* (Tyler and Gage, 1982). Size at first maturity for *O. cosmica* was assessed  
437 in the current study but remains approximate at < 4.96-mm disc diameter (in females), due to  
438 ambiguity around two relatively large specimens (6 – 7 µm disc diameters) that possessed tiny bud-  
439 like gonads in which no evidence for gametogenesis could be found. These gonads did possess nodes  
440 in which cell clumps with highly basophilic nuclei were located, which are believed to be gonadal  
441 precursors housing primordial germ cells (Figure 5c).

442 *Ophiacantha* spp. have been recorded from various hard substrata and vertically elevated fauna, such  
443 as deep-sea corals (Tyler and Gage, 1980) and tube worms (Lauerman et al., 1996; Billett et al.,  
444 2013). In the current study, this species is recorded on stalked-sponge species *Caulophacus* sp.  
445 and *Hyalonema* spp for the first time. Although alternative hard substrates are available in the CCZ  
446 (most obviously, polymetallic nodules), *O. cosmica* specimens here were exclusively epizoic; this  
447 species was not encountered elsewhere. Stalked sponges are some of the most elevated of fauna on  
448 the seafloor in the CCZ; colonising them at positions above the benthic boundary layer would  
449 mitigate the influences of shear on current speeds, which likely aids in a suspension-feeding lifestyle  
450 (Booth et al., 2008). The specimens in the current study either occurred as single individuals or, in  
451 certain instances, as size-stratified groups (Supplementary figure 3), suggestive of gregarious  
452 behaviour, offspring retention or fissiparity (though pentamer *Ophiacantha* spp. are not known to  
453 be fissiparous, Lee et al., 2019). A more detailed molecular work, beyond the scope of this study,  
454 would help to reveal common or distinct genetic origins for the members of these groups.

455 In contrast, *Ophiosphalma glabrum* examined in the current study were epibenthic as found in  
456 previous studies both within the CCZ (Amon et al., 2016; Glover et al., 2016; Christodoulou et al.,  
457 2020) and more generally in the NE Pacific (Booth et al., 2008). Stomach contents of dissected  
458 specimens also indicate that *O. glabrum* is a deposit feeder, like members of the closely related genus  
459 *Ophiomusium* (Pearson and Gage, 1984). Single individuals generally occurred in the sediment  
460 around nodules, or under habitat-forming fauna such as non-stalked sponges and xenophyophores –  
461 giant, deep-sea foraminifera with delicate agglutinated tests (Goineau and Gooday, 2019).

462 The limited availability of food in the deep-sea soft-sediment benthos is a principal driver in  
463 structuring deep-sea benthic communities characterised by low population densities but high levels of  
464 diversity (Hardy et al., 2015). The CCZ is a vast, food-limited ecosystem, reliant on the arrival of  
465 particulate organic matter (POM) to the seafloor, dictated largely by productivity at the surface  
466 (Pennington et al., 2006). While nodule substrate availability plays a role in determining species  
467 distributions (Vanreusel et al., 2016), food availability – largely dependent on POM flux – will  
468 ultimately determine population densities. Having evolved under these relatively stable conditions,  
469 communities in the abyssal deep-sea may be poorly adapted and thus highly susceptible to future  
470 mining impacts. If, for example, elevated substrata provide a nursery-type habitat for *Ophiacantha*  
471 *cosmica*, then the ramifications for reproductive success following future mining disturbance events  
472 are cause for concern. In addition, filter-feeding organisms are expected to be severely impacted by  
473 plumes and settling aggregates generated by the resuspension of sea-floor sediments during nodule  
474 collections, resulting in long-term loss of suspension feeding organisms (Simon-Lledó et al., 2019).  
475 As with all deposit feeders, changes in surface-sediment chemical and physical characteristics  
476 following mining activity (e.g., remobilisation of formerly sequestered heavy metals and sediment  
477 compaction) could increase the toxicity of ingested sediments and impact *Ophiosphalma glabrum*'s  
478 ability to forage for food.

479 Food availability (i.e., POC flux) in soft-sediment abyssal habitats is subject to spatial variability  
480 both regionally, due to an undulating seafloor topography and at ocean-basin scales, due its  
481 dependency on surface productivity (Smith et al., 2008). Such heterogeneity in POC flux could create  
482 habitat networks of richer or poorer food supply over spatial scales at which reproductive kinetics  
483 and larval dispersal become ecologically relevant (Hardy et al., 2015). The CCZ lies along a POC  
484 flux gradient: lowest in regions that underlie central oligotrophic ocean gyres and highest beneath or  
485 adjacent to coastal and equatorial regions characterised by productive upwelling zones (Smith et al.,  
486 2008). Since population densities decrease concomitantly with POC flux (Tittensor et al., 2011),  
487 species in food impoverished areas often occur at densities below the minimum needed for  
488 reproductive success (e.g. critically low encounter rates for mating), rendering them wholly  
489 dependent on larval supply from populations in higher POC-flux habitats (the oligotrophic sink  
490 hypothesis, Hardy et al., 2015). The two species examined in the current study are relatively common  
491 in the CCZ and beyond (Booth et al., 2008; Amon et al., 2016; Christodoulou et al., 2019, 2020;  
492 Simon-Lledó et al., 2019). In fact, it is for this reason that the current reproductive study was even  
493 possible. However, the relative densities at which they occur at regional scales (such as between  
494 contract areas / APEIs) varies considerably (e.g. Christodoulou et al., 2020). Should mining activities  
495 proceed in regions of higher-POC flux that play a formative role as larval sources, this may have  
496 wide-reaching detrimental effects on the most food-limited populations of these and other species  
497 that employ planktonic larval dispersal.

498 Reproductive kinetics play a fundamental role in mediating biogeographic patterns, population  
499 dynamics, metapopulation connectivity and ultimately, species survival (Ramirez Llodra, 2002).  
500 While molecular approaches can be used to examine both historical and contemporary connectivity,  
501 the temporal resolution of these data remains too poor to discriminate between sporadic regional  
502 genetic exchange that then spreads locally over successive generations, and regular regional genetic  
503 exchange that acts to supplement local populations to a biologically meaningful degree. Reproductive  
504 ecology remains vital in bridging gaps in our understanding. The current study sought to add to the  
505 paucity of reproductive data for deep-sea species in nodule environments. It also highlights an  
506 uncomfortable truth in deep-sea ecology: that classical reproductive studies of this sort, which  
507 necessitate large numbers of individuals, may not be practicable in habitats such as the CCZ where  
508 the most susceptible species are typically the rarest. Support for more ambitious approaches that  
509 compensate for sampling constraints, such as temporal studies or permanent monitoring networks are  
510 urgently needed in order for conservation measures to be effective and informed.

## 511 **5 Conflict of Interest**

512 The authors declare that the research was conducted in the absence of any commercial or financial  
513 relationships that could be construed as a potential conflict of interest.

## 514 **6 Author Contributions**

515 AH conceived reproductive study. AH, MC and PMA coordinated sample collection, fixation and  
516 preservation. MC and PMA performed all aspects of molecular ID. SRL performed specimen  
517 imagery, dissections, sectioning, histological, graphical and statistical analyses, prepared figures and  
518 wrote manuscript with scientific input from remaining authors.

## 519 **7 Funding**

520 Cruises SO239 and SO268 were financed by the German Ministry of Education and Science (BMBF)  
521 as a contribution to the European project JPI Oceans “Ecological Aspects of Deep-Sea Mining”.

522 PMA acknowledges funding from BMBF under contract 03F0707E and 03F0812E. SRL and AH are  
523 supported by FCT/MCTES through CESAM (UIDP/50017/2020 + UIDB/50017/2020) funded by  
524 national funds, through the project REDEEM (PTDC/BIA-BMA/2986102/SAICT/2017) funded  
525 by FEDER within the framework of COMPETE2020 - Programa Operacional Competitividade e  
526 Internacionalização (POCI) and by Portuguese funds through FCT in special support of the JPIO  
527 pilot action “Ecological aspects of deep-sea mining” and the project MiningImpact2 (JPI Mining  
528 2017, ref. Mining2/0002/2017), program 3599-PPCDT, Ciências do Mar - Sistemas Oceânicos e do  
529 Mar Profundo.

## 530 **8 Acknowledgments**

531 We would like to acknowledge the captain and crew of the R/V Sonne and ROV Pilots for the Kiel  
532 6000 (GEOMAR) and to the deep-sea scientists involved in cruise organisation as well as collection  
533 and processing of samples on board. Our thanks to António and Sandra Calado for the use of an  
534 ultramicrotome. A pre-print of this manuscript is available on bioRxiv, Laming et al. (2020) at  
535 <https://doi.org/10.1101/2021.02.06.428832>.

536

## 537 **9 References**

### 538 **9.1 Peer-reviewed**

- 539 Adams, N. L., Heyland, A., Rice, L. L., and Foltz, K. R. (2019). Procuring animals and culturing of  
540 eggs and embryos. *Methods in Cell Biology* 150, 3–46.
- 541 Amon, D. J., Ziegler, A. F., Dahlgren, T. G., Glover, A. G., Goineau, A., Gooday, A. J., et al. (2016).  
542 Insights into the abundance and diversity of abyssal megafauna in a polymetallic-nodule  
543 region in the eastern Clarion-Clipperton Zone. *Scientific Reports* 6, 1–12.
- 544 Baker, A. N. (2016). An illustrated catalogue of type specimens of the bathyal brittlestar genera  
545 *Ophiomusium* Lyman and *Ophiosphalma* HL Clark (Echinodermata: Ophiuroidea). *Zootaxa*  
546 4097, 1–40.
- 547 Billett, D. S. M., Bett, B. J., Evans, R., Cross, I., Tyler, P. A., and Wolff, G. A. (2013). The  
548 reproductive ecology of deep-sea ophiuroids around the Crozet plateau, Southern Indian  
549 ocean, under contrasting productivity regimes. *Deep Sea Research Part II: Topical Studies in*  
550 *Oceanography* 92, 18–26. doi:10.1016/j.dsr2.2013.03.002.
- 551 Booth, J. A. T., Ruhl, H. A., Lovell, L. L., Bailey, D. M., and Smith, K. L. (2008). Size–frequency  
552 dynamics of NE Pacific abyssal ophiuroids (Echinodermata: Ophiuroidea). *Marine Biology*  
553 154, 933–941. doi:10.1007/s00227-008-0982-3.
- 554 Brogger, M. I., Martinez, M. I., Zabala, S., and Penchaszadeh, P. E. (2013). Reproduction of  
555 *Ophioplocus januarii* (Echinodermata: Ophiuroidea): a continuous breeder in northern  
556 Patagonia, Argentina. *Aquatic Biology* 19, 275–285.
- 557 Brix, S., Osborn, K. J., Kaiser, S., Truskey, S. B., Schnurr, S. M., Brenke, N., et al. (2020). Adult life  
558 strategy affects distribution patterns in abyssal isopods—implications for conservation in  
559 Pacific nodule areas. *Biogeosciences* 17, 6163–6184.

- 560 Christodoulou, M., O'Hara, T. D., Hugall, A. F., and Arbizu, P. M. (2019). Dark Ophiuroid  
561 Biodiversity in a Prospective Abyssal Mine Field. *Current Biology* 29, 3909-3912.e3.  
562 doi:10.1016/j.cub.2019.09.012.
- 563 Christodoulou, M., O'Hara, T., Hugall, A. F., Khodami, S., Rodrigues, C. F., Hilario, A., et al.  
564 (2020). Unexpected high abyssal ophiuroid diversity in polymetallic nodule fields of the  
565 northeast Pacific Ocean and implications for conservation. *Biogeosciences* 17, 1845–1876.
- 566 Clark, A. H. (1949). Ophiuroidea of the Hawaiian islands. *Bulletin of the Bernice P. Bishop Museum*  
567 195, 3–133.
- 568 Clark, H. L. (1911). *North Pacific Ophiurans in the Collection of the United States National*  
569 *Museum*. US Government Printing Office.
- 570 Clark, H. L. (1913). *Echinoderms from Lower California, with descriptions of new species.*, ed.  
571 Allen J. A. (Joel Asaph) New York: American Museum of Natural History Available at:  
572 <https://www.biodiversitylibrary.org/item/86424>.
- 573 Danovaro, R., Aguzzi, J., Fanelli, E., Billett, D., Gjerde, K., Jamieson, A., et al. (2017). An  
574 ecosystem-based deep-ocean strategy. *Science* 355, 452–454.
- 575 De Smet, B., Pape, E., Riehl, T., Bonifácio, P., Colson, L., and Vanreusel, A. (2017). The community  
576 structure of deep-sea macrofauna associated with polymetallic nodules in the eastern part of  
577 the Clarion-Clipperton Fracture Zone. *Frontiers in Marine Science* 4, 103.
- 578 Doyle, G. M., Hamel, J.-F., and Mercier, A. (2012). A new quantitative analysis of ovarian  
579 development in echinoderms: the maturity stage index. *Marine biology* 159, 455–465.
- 580 Gage, J. D. (1982). Age structure in populations of the deep-sea brittle star *Ophiomusium lymani*: a  
581 regional comparison. *Deep Sea Research Part A. Oceanographic Research Papers* 29, 1565–  
582 1586. doi:10.1016/0198-0149(82)90044-9.
- 583 Gage, J. D., Anderson, R. M., Tyler, P. A., Chapman, R., and Dolan, E. (2004). Growth, reproduction  
584 and possible recruitment variability in the abyssal brittle star *Ophiocten hastatum*  
585 (Ophiuroidea: Echinodermata) in the NE Atlantic. *Deep Sea Research Part I: Oceanographic*  
586 *Research Papers* 51, 849–864. doi:10.1016/j.dsr.2004.01.007.
- 587 Gage, J. D., and Tyler, P. A. (1982). Growth and reproduction of the deep-sea brittlestar  
588 *Ophiomusium lymani* Wyville Thomson. *Oceanologica acta* 5, 73–83.
- 589 Gage, J. D., and Tyler, P. A. (1991). *Deep-sea biology: a natural history of organisms at the deep-*  
590 *sea floor*. Cambridge University Press.
- 591 Ghosh, A. K., and Mukhopadhyay, R. (2000). Mineral wealth of the ocean. *Rotterdam, The*  
592 *Netherlands: AA Balkema, Rotterdam* 260.
- 593 Gielazyn, M. L., Stancyk, S. E., and Piegorsch, W. W. (1999). Experimental evidence of subsurface  
594 feeding by the burrowing ophiuroid *Amphipholis gracillima* (Echinodermata). *Marine*  
595 *Ecology Progress Series* 184, 129–138.

- 596 Glover, A. G., Wiklund, H., Rabone, M., Amon, D. J., Smith, C. R., O'Hara, T., et al. (2016).  
597 Abyssal fauna of the UK-1 polymetallic nodule exploration claim, Clarion-Clipperton Zone,  
598 central Pacific Ocean: Echinodermata. *BDJ* 4, e7251. doi:10.3897/BDJ.4.e7251.
- 599 Goineau, A., and Gooday, A. J. (2019). Diversity and spatial patterns of foraminiferal assemblages in  
600 the eastern Clarion-Clipperton zone (abyssal eastern equatorial Pacific). *Deep Sea Research*  
601 *Part I: Oceanographic Research Papers* 149, 103036. doi:10.1016/j.dsr.2019.04.014.
- 602 Hardy, S. M., Smith, C. R., and Thurnherr, A. M. (2015). Can the source-sink hypothesis explain  
603 macrofaunal abundance patterns in the abyss? A modelling test. *Proceedings of the Royal*  
604 *Society B: Biological Sciences* 282, 20150193.
- 605 Hauquier, F., Macheriotou, L., Bezerra, T. N., Egho, G., Martínez Arbizu, P., Janssen, F., et al.  
606 (2018). Meiofaunal communities in the Clarion-Clipperton Zone: geographic distribution and  
607 link with environmental conditions. in.
- 608 Hein, J. R., Mizell, K., Koschinsky, A., and Conrad, T. A. (2013). Deep-ocean mineral deposits as a  
609 source of critical metals for high-and green-technology applications: Comparison with land-  
610 based resources. *Ore Geology Reviews* 51, 1-14.
- 611 Hendler, G. (1991). Echinodermata: Ophiuroidea. In: Giese, A.C., Pearse, J.S., Pearse, V. (eds.)  
612 *Reproduction of marine invertebrates, Vol VI*. Boxwood Press, Pacific Grove, CA, p 356-510
- 613 Kuhnz, L. A., Ruhl, H. A., Huffard, C. L., and Smith, K. L. (2014). Rapid changes and long-term  
614 cycles in the benthic megafaunal community observed over 24 years in the abyssal northeast  
615 Pacific. *Progress in Oceanography* 124, 1-11. doi:10.1016/j.pocean.2014.04.007.
- 616 Laming, S. R., Hourdez, S., Cambon-Bonavita, M.-A., and Pradillon, F. (2020). Classical and  
617 computed tomographic anatomical analyses in a not-so-cryptic *Alviniconcha* species complex  
618 from hydrothermal vents in the SW Pacific. *Frontiers in Zoology* 17, 12. doi:10.1186/s12983-  
619 020-00357-x.
- 620 Lauerman, L. M. L., Kaufmann, R. S., and Smith, K. L. (1996). Distribution and abundance of  
621 epibenthic megafauna at a long time-series station in the abyssal northeast Pacific. *Deep Sea*  
622 *Research Part I: Oceanographic Research Papers* 43, 1075-1103. doi:10.1016/0967-  
623 0637(96)00045-3.
- 624 Lebrato, M., Iglesias-Rodríguez, D., Feely, R. A., Greeley, D., Jones, D. O. B., Suarez-Bosche, N., et  
625 al. (2010). Global contribution of echinoderms to the marine carbon cycle: CaCO<sub>3</sub> budget  
626 and benthic compartments. *Ecological Monographs* 80, 441-467. doi:10.1890/09-0553.1.
- 627 Lee, T., Stöhr, S., Bae, Y. J., and Shin, S. (2019). A New Fissiparous Brittle Star, *Ophiacantha*  
628 *scissionis* sp. nov. (Echinodermata, Ophiuroidea, Ophiacanthida), from Jeju Island, Korea.  
629 *Zool Stud* 58, e8-e8. doi:10.6620/ZS.2019.58-08.
- 630 Lütken, C. F., and Mortensen, T. (1899). The Ophiuridae. *Memoirs of the Museum of Comparative*  
631 *Zoölogy* 23, 93-208.
- 632 Lyman, T. (1878). Ophiuridae and Astrophytidae of the exploring voyage of HMS "Challenger"  
633 under Prof. Sir Wyville Thomson FRS. Part I. *Bull. Mus. Comp. Zool. Harvard* 5, 65-158.

- 634 Lyman, T. (1879). Ophiuridae and Astrophytidae of the exploring voyage of HMS “Challenger”  
635 under Prof. Sir Wyville Thomson FRS. Part II. *Bull. Mus. Comp. Zool. Harvard* 6, 17–83.
- 636 Lyman, T. (1882). Report on the Ophiuroidea dredged by HMS Challenger during the years 1873-  
637 1876. *Report of the Scientific Results of the Voyage of HMS Challenger during 1873-1876*,  
638 *Zoology* 5, 1–386.
- 639 Martynov, A. V., and Litvinova, N. M. (2008). Deep-water Ophiuroidea of the northern Atlantic with  
640 descriptions of three species and taxonomic remarks on certain genera and species. *Marine*  
641 *Biology research* 4, 76–111.
- 642 Mercier, A., and Hamel, J.-F. (2009). *Advances in Marine Biology: Endogenous and Exogenous*  
643 *Control of Gametogenesis and Spawning in Echinoderms*. Elsevier Science.
- 644 Mercier, A., Sewell, M. A., and Hamel, J.-F. (2013). Pelagic propagule duration and developmental  
645 mode: reassessment of a fading link. *Global Ecology and Biogeography* 22, 517–530.  
646 doi:10.1111/geb.12018.
- 647 Mercier, A., Ycaza, R. H., and Hamel, J.-F. (2007). Long-term study of gamete release in a  
648 broadcast-spawning holothurian: predictable lunar and diel periodicities. *Marine Ecology*  
649 *Progress Series* 329, 179–189.
- 650 O’Hara, T. D., Rowden, A. A., and Williams, A. (2008). Cold-water coral habitats on seamounts: do  
651 they have a specialist fauna? *Diversity and Distributions* 14, 925–934. doi:10.1111/j.1472-  
652 4642.2008.00495.x.
- 653 Paterson, G. L. (1985). The deep-sea Ophiuroidea of the north Atlantic Ocean. *Bulletin of the British*  
654 *Museum (Natural History)* 49, 1–162.
- 655 Pearson, M., and Gage, J. D. (1984). Diets of some deep-sea brittle stars in the Rockall Trough.  
656 *Marine Biology* 82, 247–258. doi:10.1007/BF00392406
- 657 Pennington, J. T., Mahoney, K. L., Kuwahara, V. S., Kolber, D. D., Calienes, R., and Chavez, F. P.  
658 (2006). Primary production in the eastern tropical Pacific: A review. *Progress in*  
659 *Oceanography* 69, 285–317. doi:10.1016/j.pocean.2006.03.012.
- 660 R Core Team (2020). *R: A Language and Environment for Statistical Computing*. Vienna, Austria: R  
661 Foundation for Statistical Computing Available at: <https://www.R-project.org/>.
- 662 Ramirez Llodra, E. (2002). Fecundity and life-history strategies in marine invertebrates. *Advances in*  
663 *Marine Biology* 43, 87–170. doi:10.1016/S0065-2881(02)43004-0.
- 664 Schindelin, J., Arganda-Carreras, I., Frise, E., Kaynig, V., Longair, M., Pietzsch, T., et al. (2012).  
665 Fiji: an open-source platform for biological-image analysis. *Nature Methods* 9, 676–682.  
666 doi:10.1038/nmeth.2019.
- 667 Sewell, M. A., and Young, C. M. (1997). Are Echinoderm Egg Size Distributions Bimodal? *The*  
668 *Biological Bulletin* 193, 297–305. doi:10.2307/1542932.



- 669 Shulse, C. N., Maillot, B., Smith, C. R., and Church, M. J. (2017). Polymetallic nodules, sediments,  
670 and deep waters in the equatorial North Pacific exhibit highly diverse and distinct bacterial,  
671 archaeal, and microeukaryotic communities. *MicrobiologyOpen* 6, e00428.  
672 doi:10.1002/mbo3.428.
- 673 Simon-Lledó, E., Bett, B. J., Huvenne, V. A. I., Köser, K., Schoening, T., Greinert, J., et al. (2019).  
674 Biological effects 26 years after simulated deep-sea mining. *Scientific Reports* 9, 8040.  
675 doi:10.1038/s41598-019-44492-w.
- 676 Simon-Lledó, E., Pomee, C., Ahokava, A., Drazen, J. C., Leitner, A. B., Flynn, A., et al. (2020).  
677 Multi-scale variations in invertebrate and fish megafauna in the mid-eastern Clarion  
678 Clipperton Zone. *Progress in Oceanography* 187, 102405.  
679 doi:10.1016/j.pocean.2020.102405.
- 680 Smith, C. R., De Leo, F. C., Bernardino, A. F., Sweetman, A. K., and Arbizu, P. M. (2008). Abyssal  
681 food limitation, ecosystem structure and climate change. *Trends in Ecology & Evolution* 23,  
682 518–528.
- 683 Smith, K. L., Ruhl, H. A., Huffard, C. L., Messié, M., and Kahru, M. (2018). Episodic organic  
684 carbon fluxes from surface ocean to abyssal depths during long-term monitoring in NE  
685 Pacific. *Proceedings of the National Academy of Sciences* 115, 12235–12240.  
686 doi:10.1073/pnas.1814559115.
- 687 Stearns, S. C. (2000). Life history evolution: successes, limitations, and prospects.  
688 *Naturwissenschaften* 87, 476–486.
- 689 Stöhr, S., O’Hara, T. D., and Thuy, B. (2012). Global diversity of brittle stars (Echinodermata:  
690 Ophiuroidea). *PLoS One* 7, e31940.
- 691 Tittensor, D. P., Rex, M. A., Stuart, C. T., McClain, C. R., and Smith, C. R. (2011). Species–energy  
692 relationships in deep-sea molluscs. *Biology Letters* 7, 718–722.
- 693 Tyler, P. A. (1977). Seasonal variation and ecology of gametogenesis in the genus *Ophiura*  
694 (Ophiuroidea: Echinodermata) from the Bristol channel. *Journal of Experimental Marine*  
695 *Biology and Ecology* 30, 185–197. doi:10.1016/0022-0981(77)90011-9
- 696 Tyler, P. A., and Gage, J. D. (1980). Reproduction and growth of the deep-sea brittlestar *Ophiura*  
697 *ljungmani* (Lyman). *Oceanologica acta* 3, 177–185.
- 698 Tyler, P. A., and Gage, J. D. (1982). The reproductive biology of *Ophiacantha bidentata*  
699 (Echinodermata: Ophiuroidea) from the Rockall Trough. *Journal of the Marine Biological*  
700 *Association of the United Kingdom* 62, 45–55. doi:10.1017/S0025315400020099.
- 701 Vanreusel, A., Hilario, A., Ribeiro, P. A., Menot, L., and Arbizu, P. M. (2016). Threatened by  
702 mining, polymetallic nodules are required to preserve abyssal epifauna. *Scientific Reports* 6,  
703 26808. doi:10.1038/srep26808.
- 704 Weaver, P. P. E., Billett, D. S. M., and Van Dover, C. L. (2018). “Environmental Risks of Deep-sea  
705 Mining,” in *Handbook on Marine Environment Protection* □: *Science, Impacts and*

- 706 *Sustainable Management*, eds. M. Salomon and T. Markus (Cham: Springer International  
707 Publishing), 215–245. Available at: [https://doi.org/10.1007/978-3-319-60156-4\\_11](https://doi.org/10.1007/978-3-319-60156-4_11).
- 708 Wessel, G. M., Voronina, E., and Brooks, J. M. (2004). Obtaining and Handling Echinoderm  
709 Oocytes. *Methods in Cell Biology* 74, 87–114. doi:10.1016/S0091-679X(04)74005-4.
- 710 Wickham, H., Averick, M., Bryan, J., Chang, W., McGowan, L. D., François, R., et al. (2019).  
711 Welcome to the Tidyverse. *Journal of Open Source Software* 4, 1686.
- 712 Wilkie, I. C. (2016). Functional Morphology of the Arm Spine Joint and Adjacent Structures of the  
713 Brittlestar *Ophiocomina nigra* (Echinodermata: Ophiuroidea). *PLOS ONE* 11, e0167533.  
714 doi:10.1371/journal.pone.0167533.
- 715 Wilson, G. D. F. (2017). Macrofauna abundance, species diversity and turnover at three sites in the  
716 Clipperton-Clarion Fracture Zone. *Marine Biodiversity* 47, 323–347. doi:10.1007/s12526-  
717 016-0609-8.
- 718 Young, C. M. (2003). “Reproduction, development and life-history traits,” in *Ecosystems of the deep*  
719 *oceans*, ed. P. A. Tyler (Amsterdam: Elsevier), 381–426.

720

## 721 **9.2 R software and package references (those not subject to peer review)**

- 722 R Core Team (2020). *R: A Language and Environment for Statistical Computing*. Vienna, Austria: R  
723 Foundation for Statistical Computing. Available at: <https://www.R-project.org/>.
- 724 Attali, D., and Baker, C. (2019). *ggExtra: Add Marginal Histograms to “ggplot2”, and More*  
725 *“ggplot2” Enhancements*. Available at: <https://CRAN.R-project.org/package=ggExtra>.
- 726 Kassambara, A., and Kassambara, M. A. (2020). *ggpubr: “ggplot2” Based Publication Ready Plots*.  
727 Available at: <https://CRAN.R-project.org/package=ggpubr>.
- 728 Wickham, H., Henry, L., Pedersen, T. L., Luciani, T. J., Decorde, M., and Lise, V. (2020). *svglite:*  
729 *An “SVG” Graphics Device*. Available at: <https://CRAN.R-project.org/package=svglite>.
- 730 Wilke, C. O. (2020). *cowplot: Streamlined Plot Theme and Plot Annotations for “ggplot2.”*  
731 Available at: <https://CRAN.R-project.org/package=cowplot>.

732

## 733 **10 Supplementary Material**

734 The Supplementary Material for this article can be found in an accompanying PDF presentation  
735 entitled “Supplementary material.pdf”.

736

## 737 **11 Data Availability Statement**

738 Oocyte feret diameter measurements used in this study can be made available upon request.  
739 Molecular data and sample metadata may be found here: <http://dx.doi.org/10.5883/DS-CCZ4>. This  
740 dataset contains accession codes (Genbank), BOLD IDs, disc diameters, assigned sex and gonad  
741 state, along with photos, trace files and collection data.

742

743 **12 Figures**

744 **Figure 1 Map of eastern Clarion-Clipperton Fracture Zone (CCZ) with sampling details**

745 Map depicts the eastern half of the Area within the CCZ. Large 400 x 400 km square regions are  
746 Areas of Particular Environmental Interest (APEI) that border numerous exploration contract areas in  
747 the centre (N.B. so-called “reserved” areas are not shown). The areas in which specimens were  
748 collected are identified along with site locations for each cruise. These were from the BGR area  
749 (Federal Institute for Geosciences and Natural Resources, Germany); the southern IOM area  
750 (Interoceanmetal Joint Organization); and both the central and the easternmost GSR areas (G-TEC  
751 Sea Mineral Resources NV, Belgium).

752

753 **Figure 2 Example discs of *Ophiosphalma glabrum* and *Ophiacantha cosmica* from the current**  
754 **study**

755 The aboral and oral faces of a subset of specimens encountered during the SO268 cruise in 2019 are  
756 pictured, representative of the size ranges encountered. Abbreviations: **Juv** juvenile; **Un**  
757 *undetermined sex* (see main text).

758

759 **Figure 3 Size-class frequency distributions of *Ophiosphalma glabrum* and *Ophiacantha cosmica***  
760 **disc diameters**

761 Frequency histograms are colour-coded by sex (including a ‘No gonad’ category for immature  
762 specimens and an “Inconclusive” category for specimens with gonads devoid of gametes). Main  $\chi^2$   
763 statistics relate to test for deviation from a 1:1 sex ratio (M vs F only). Marginal box and whisker  
764 plots depict medians (vertical line), inter-quartile (box width) and 90% (whisker) ranges in disc  
765 diameter for each sex category. Proximate K-W  $\chi^2$  statistic and p-value in a) relate to Kruskal-Wallis  
766 test for ranked differences in disc diameter as a function of all sex categories in *Ophiosphalma*  
767 *glabrum*. Significant post-hoc pairwise comparisons (Dunn’s tests) are those with no letter  
768 annotations in common. Size-classes for each species are the same for comparative purposes.

769

770 **Figure 4 Gametogenesis and gonad development in *Ophiosphalma glabrum***

771 Gonads at various stages of development in *O. glabrum*, as follows: a) *developing* testes in which  
772 spermatogenic columns (**SC**) are evident (indicated with arrows), b) *ripe* testes and c) *post-spawn /*  
773 *recovery* testes; d) *developing* ovaries, e) *nearly ripe* ovaries and f) *post-spawn / recovery* ovaries;  
774 visual aspect of g) *developing* testes [corresponding to a], h) *ripe* testes [corresponding to b] and i)  
775 *post-spawn / recovery* testes [corresponding to c] and finally, visual aspect of j) *developing* ovaries  
776 [corresponding to d], k) *nearly ripe* ovaries [corresponding to e] and l) a single ovary viewed down  
777 the distal-proximal axis, where late-stage oocytes are located distally (foreground), having previously  
778 developed from the basal region where early-stage oocytes are visible beneath. White arrowheads in  
779 g-l indicate single gonads, purple dotted lines are midlines of arm bases. Other abbreviations: **As**  
780 *Asymmetric oocytes*, **NPh** *Nutritive phagocytes*, **Pv** *Previtellogenic oocytes*, **R** *Residual oocytes*, **VI**  
781 *Vitellogenic I oocytes*, **VII** *Vitellogenic II oocytes*, **Sz** *Spermatazoa*, **VIII** *Vitellogenic III oocytes*.

782

783 **Figure 5 Gametogenesis and gonad development in *Ophiacantha cosmica***

784 Gonads at different stages of development in *O. cosmica*: a) *developing* testes, in which  
785 spermatogenic columns are evident (dotted arrow), where cells at progressive developmental stages  
786 form chains that extend from the inner-sac membrane into the central lumen; b) *developing* ovaries,  
787 in which various oogenic stages co-occur (largest oocytes are distal-most to region of gonad  
788 attachment); and c) pre-gametogenic gonadal tissue, with densely arranged pockets of putative  
789 primordial germ cells with basophilic nuclei that appear to form node-like gonadal precursors.

790 Abbreviations: **Og** *Oogonia (putative)*, **Pv** *Previtellogenic oocytes*, **VI** *Vitellogenic I oocytes*, **VII**  
791 *Vitellogenic II oocytes*, **VIII** *Vitellogenic III oocytes*.

792

### 793 **Figure 6 Oocyte size-class frequency distributions**

794 Frequency histograms display the relative proportions of oocytes in each size-class for feret  
795 diameters measured in females of each species. Only oocytes with nuclei were considered. Colour  
796 coding relates to associated oogenic developmental stages, assessed on a case-by-case basis for each  
797 oocyte counted and measured. Data for *Ophiosphalma glabrum* are on the left (a – c) displaying; a)  
798 whole *O. glabrum* dataset; b) data by sampling year and; c) data by site for each year. Data for  
799 *Ophiacantha cosmica* are on the right (d – e), displaying; d) whole *O. cosmica* dataset and e) data by  
800 sampling year (this species was only recovered from the BGR contract area). N = total number of  
801 females, n= total number of oocytes pooled from N females.

802

### 803 **Figure 7 Reproductive metrics plotted as a function of gonad state and oocyte density**

804 Analyses are based on 23 female specimens, of which 14 were *nearly ripe*, 5 were *developing* and 4  
805 were in *post-spawning / recovery*. a) Percentage-gonad occupied by oocytes, b) overall mean feret  
806 diameter per individual and c) a maturity stage index (MSI) developed by Doyle, Hamel, and Mercier  
807 (2012) were each calculated and evaluated as a function of gonad state, using Kruskal-Wallis Chi-  
808 squared tests on ranked data, the results of which are included in the top right corners for each.  
809 Significant post-hoc pairwise comparisons (Dunn's tests) are those with no letter annotations in  
810 common. Depicted in d) is the Spearman rank-correlation analysis performed to identify any  
811 relationship between mean oocyte diameters and corresponding densities, with the resulting Rho  
812 statistic (R), p-value and 95-% confidence intervals displayed.

813

### 814 **Figure 8 Variation in feret diameter in *O. glabrum* and *O. cosmica* with specimen size**

815 Analyses are based on twenty-five *O. glabrum* specimens, of which 14 were *nearly ripe*, 5 were  
816 *developing* and 6 were in *post-spawning / recovery* and seven *O. cosmica* specimens, of which all but  
817 one was *developing*. Scatterplots display variation in oocyte feret diameters as a function disc  
818 diameter for female specimens in each gonad state identified, where colour-coding depicts oogenic  
819 developmental stage of each oocyte. Significant differences in oocyte feret diameter across specimen  
820 size classes were assessed for each gonad state (where possible), using Kruskal-Wallis Chi-squared  
821 tests on ranked data (see main text and Supplementary figure 1 for Box and whisker plots of binned  
822 disc-diameter data).

823

### 824 **Figure 9 In-situ photograph of a group of *O. cosmica* on a stalked sponge**

825 Pictured are two females (large orange arrowhead) and several juvenile specimens (small green  
826 arrowheads) of *O. cosmica* that were sampled in the BGR contract area in 2019 during the SO268  
827 R/V Sonne cruise. NB. Dark rock-like deposits in sediment are polymetallic nodules. Photo credit:  
828 ROV Kiel 6000, GEOMAR

829

830

831

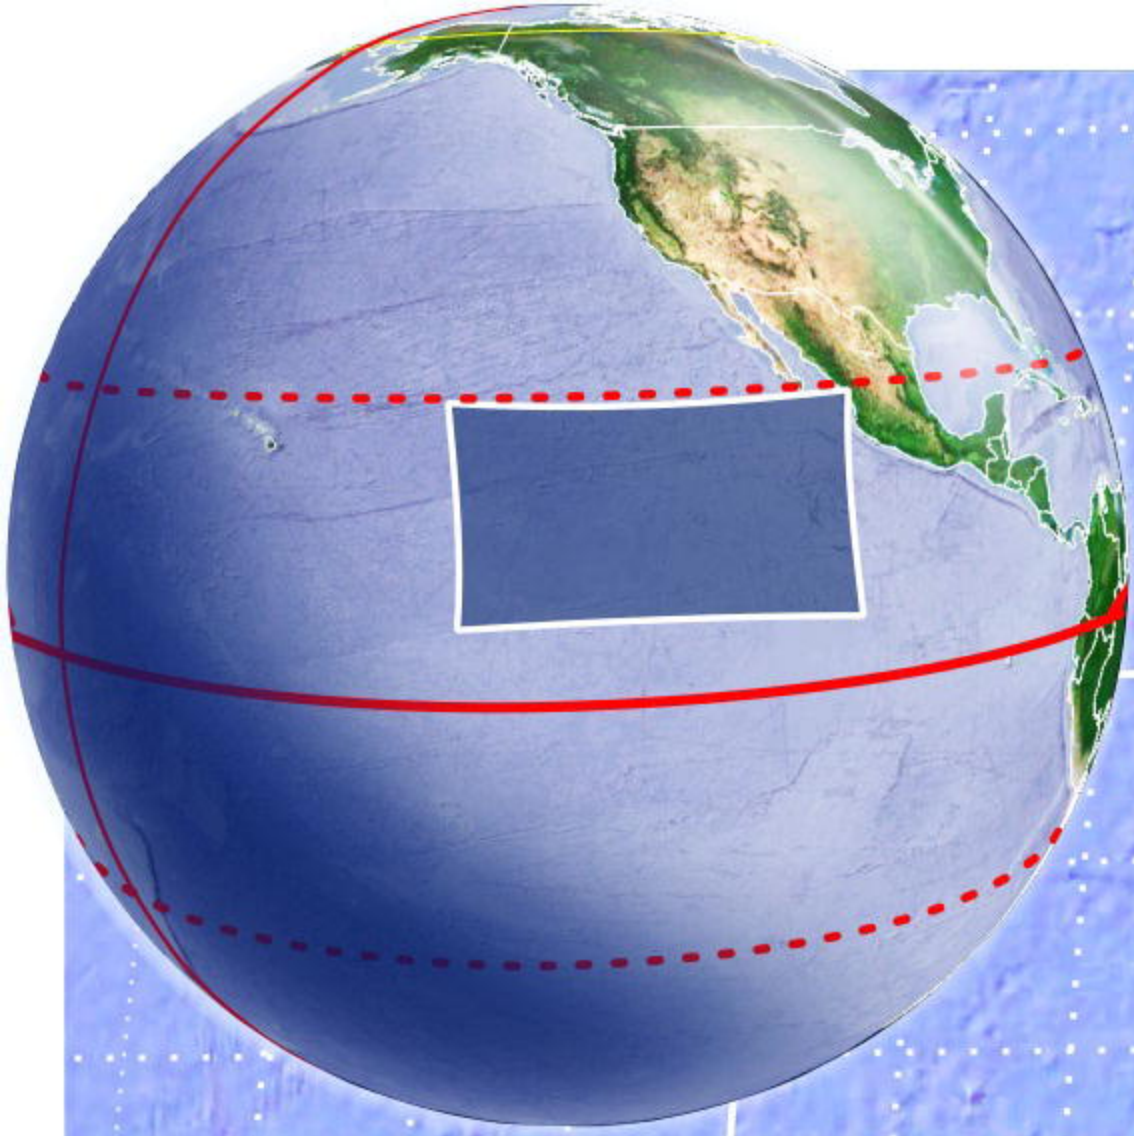

bioRxiv preprint doi: <https://doi.org/10.1101/2021.02.06.428832>; this version posted March 25, 2021. The copyright holder for this preprint (which was not certified by peer review) is the author/funder, who has granted bioRxiv a license to display the preprint in perpetuity. It is made available under aCC-BY-NC-ND 4.0 International license.

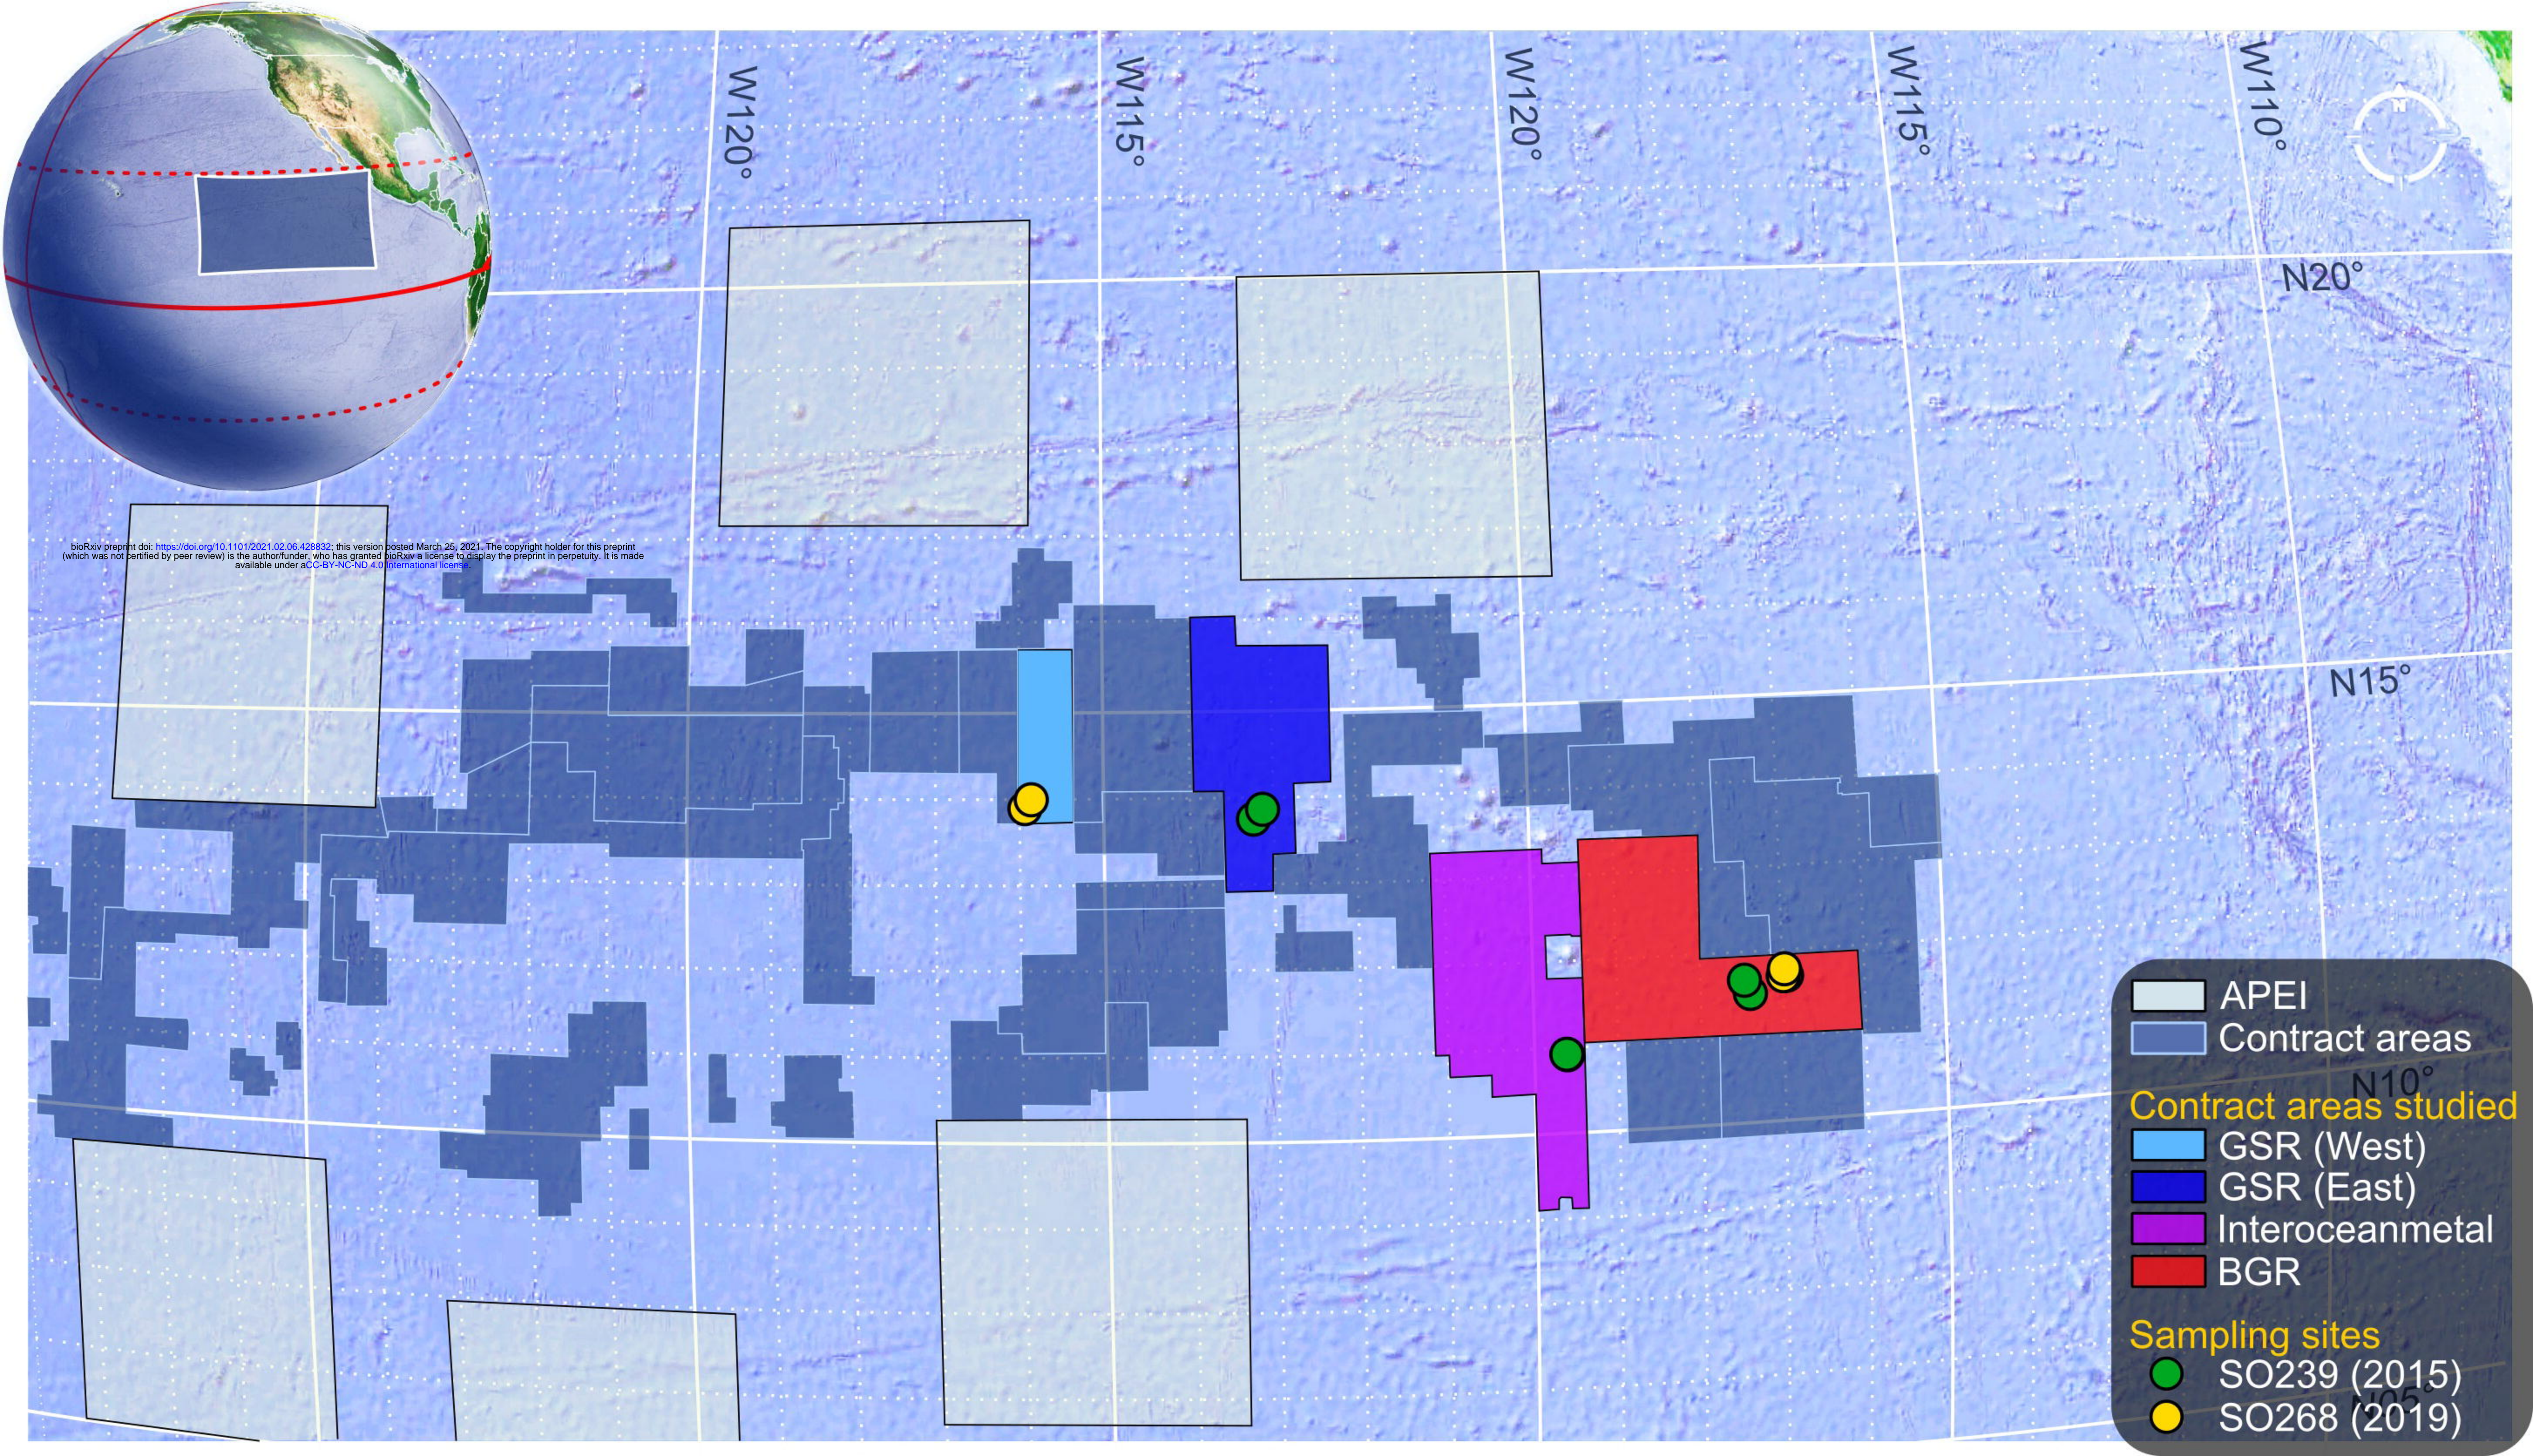

- APEI
- Contract areas
- Contract areas studied**
- GSR (West)
- GSR (East)
- Interoceanmetal
- BGR
- Sampling sites**
- SO239 (2015)
- SO268 (2019)

*Ophiosphalma glabrum*

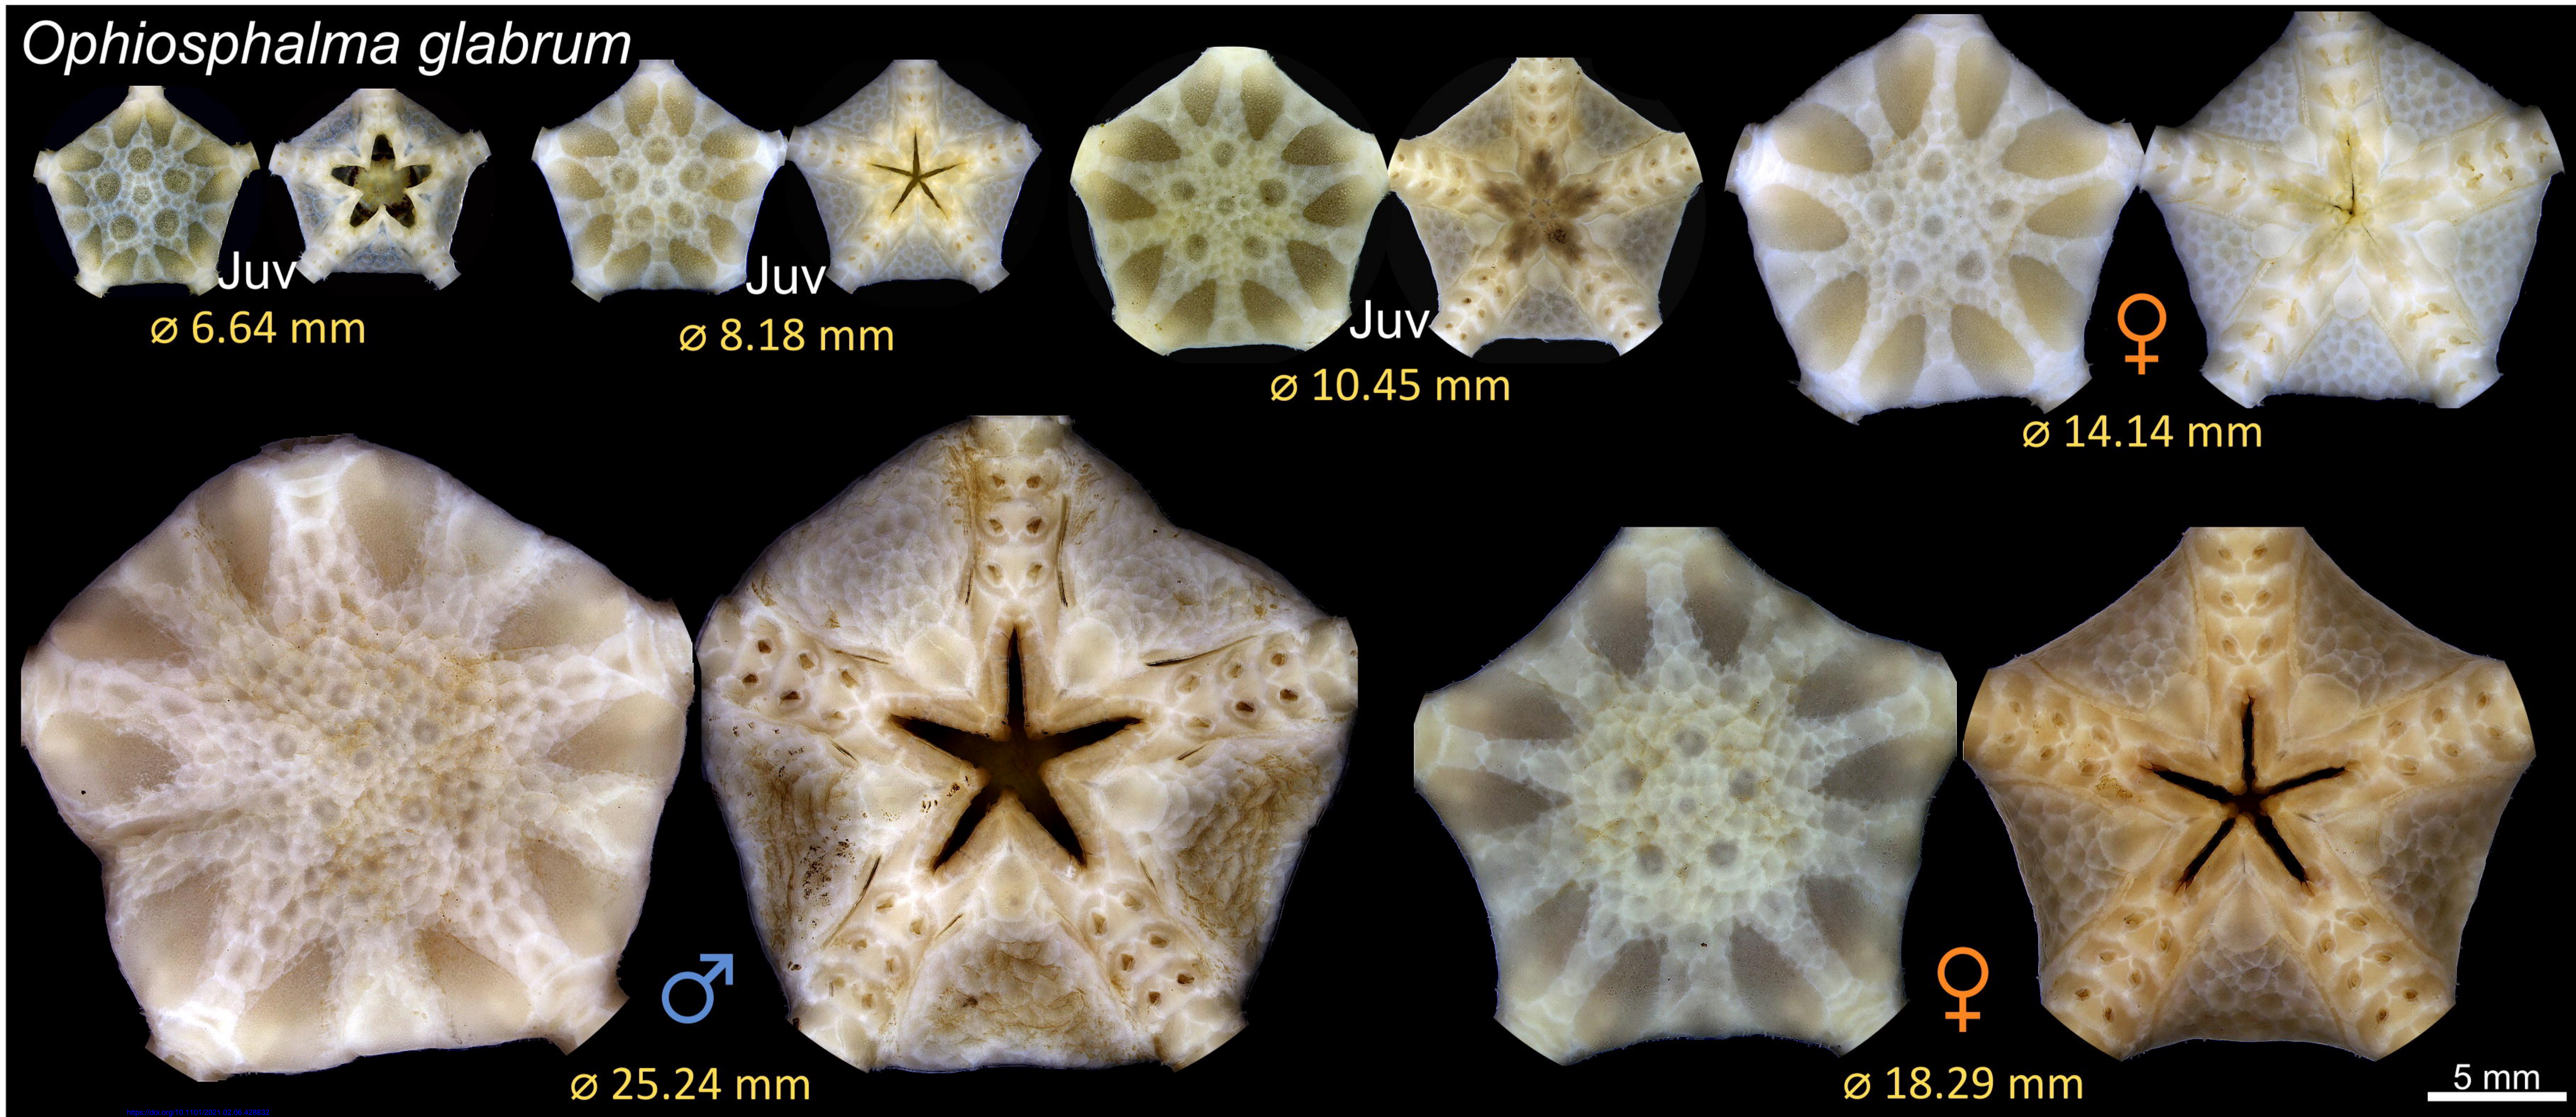

*Ophiacantha cosmica*

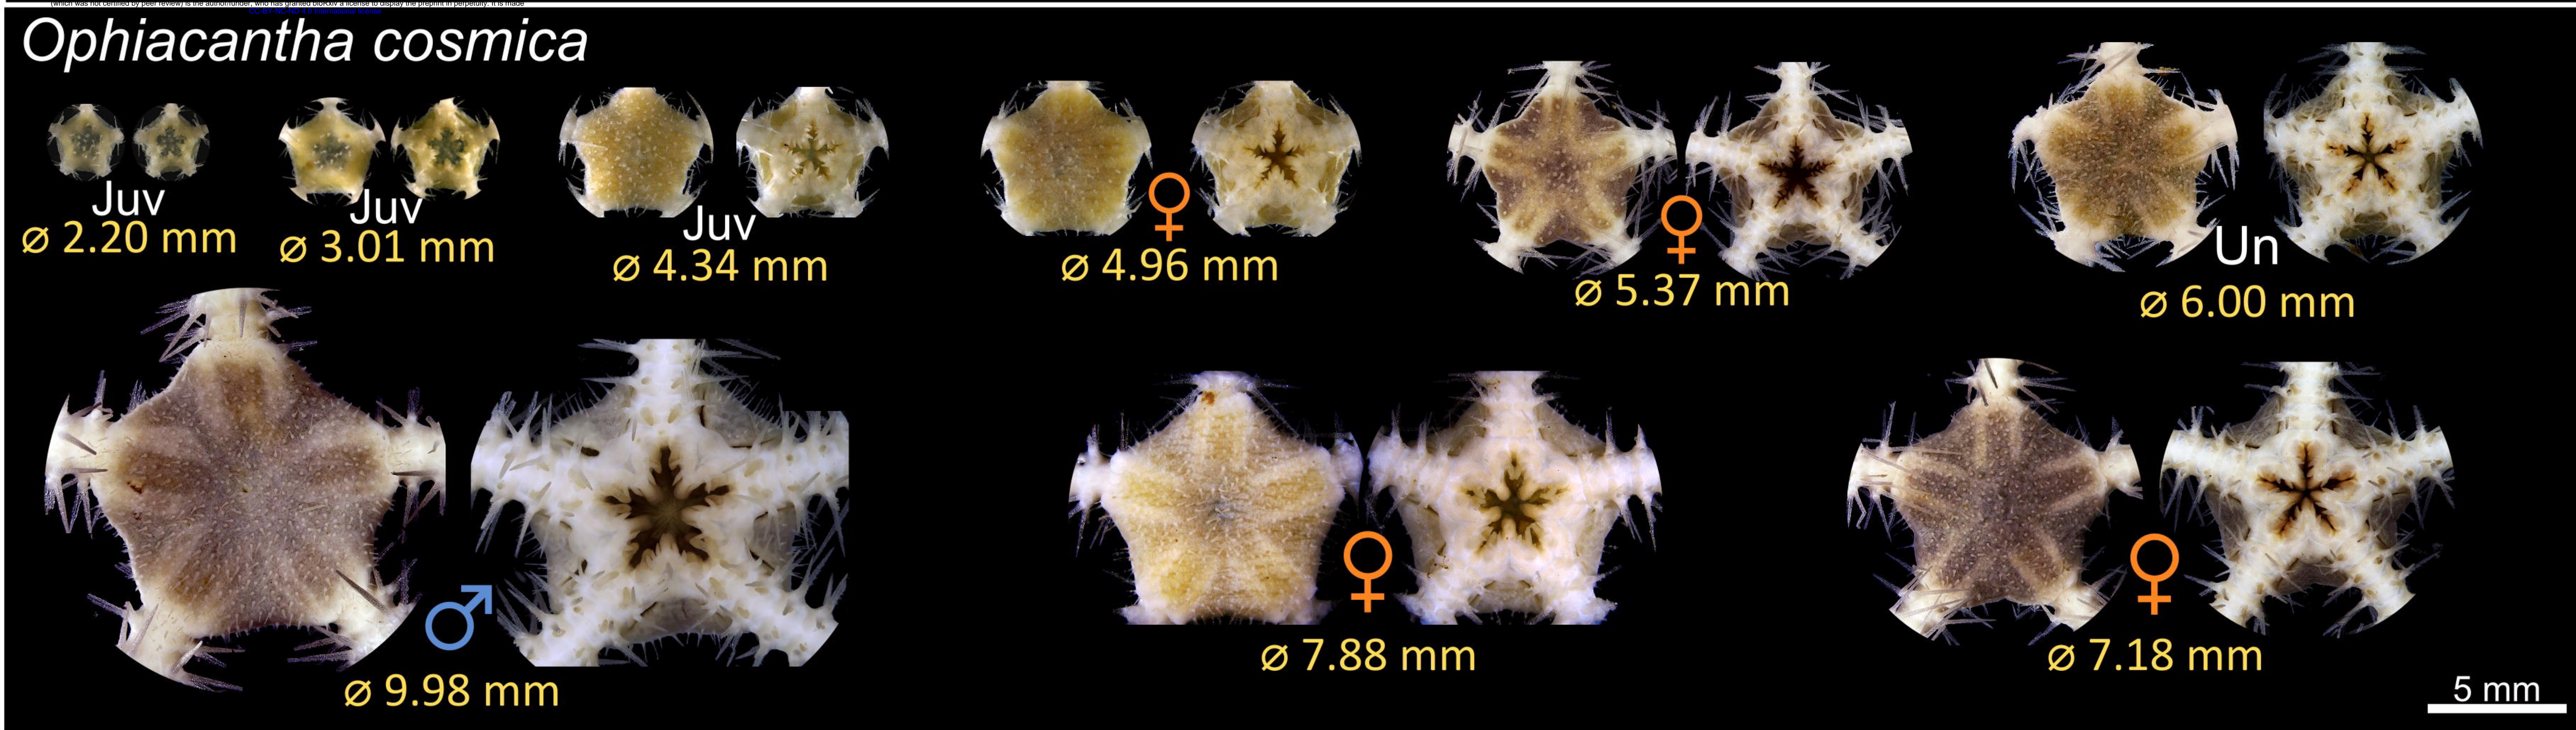

a) *Ophiosphalma glabrum*

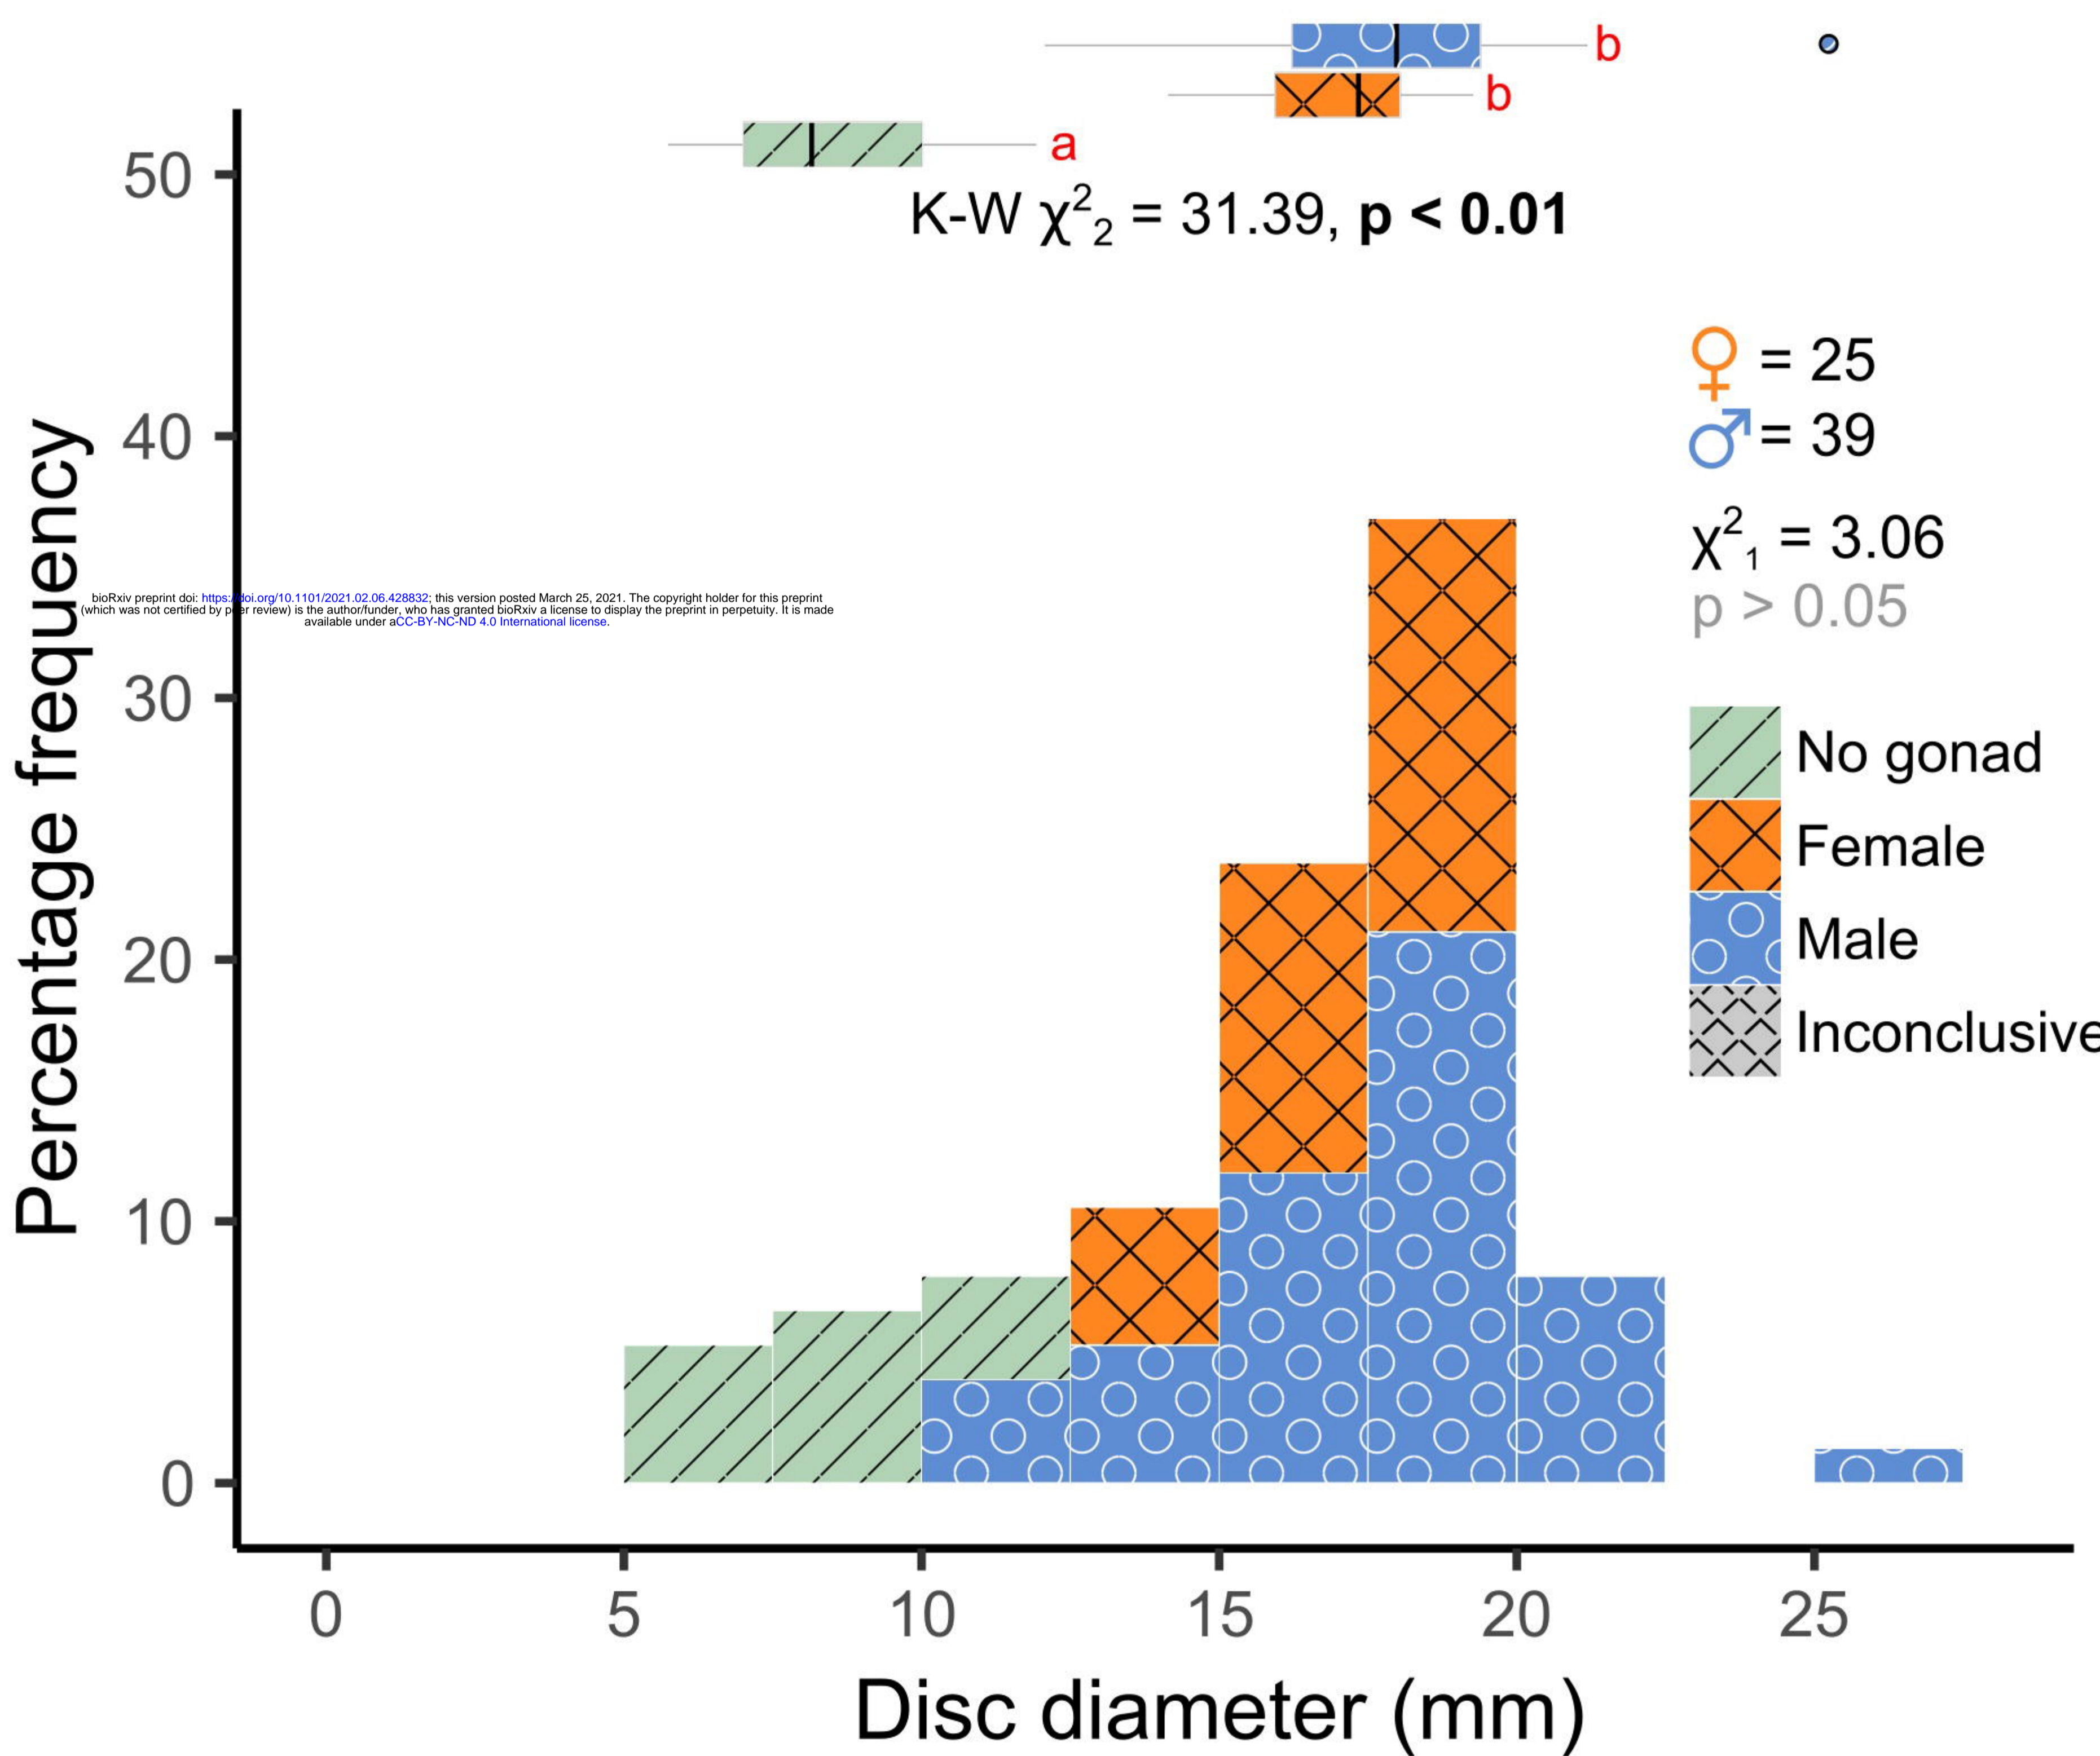

b) *Ophiacantha cosmica*

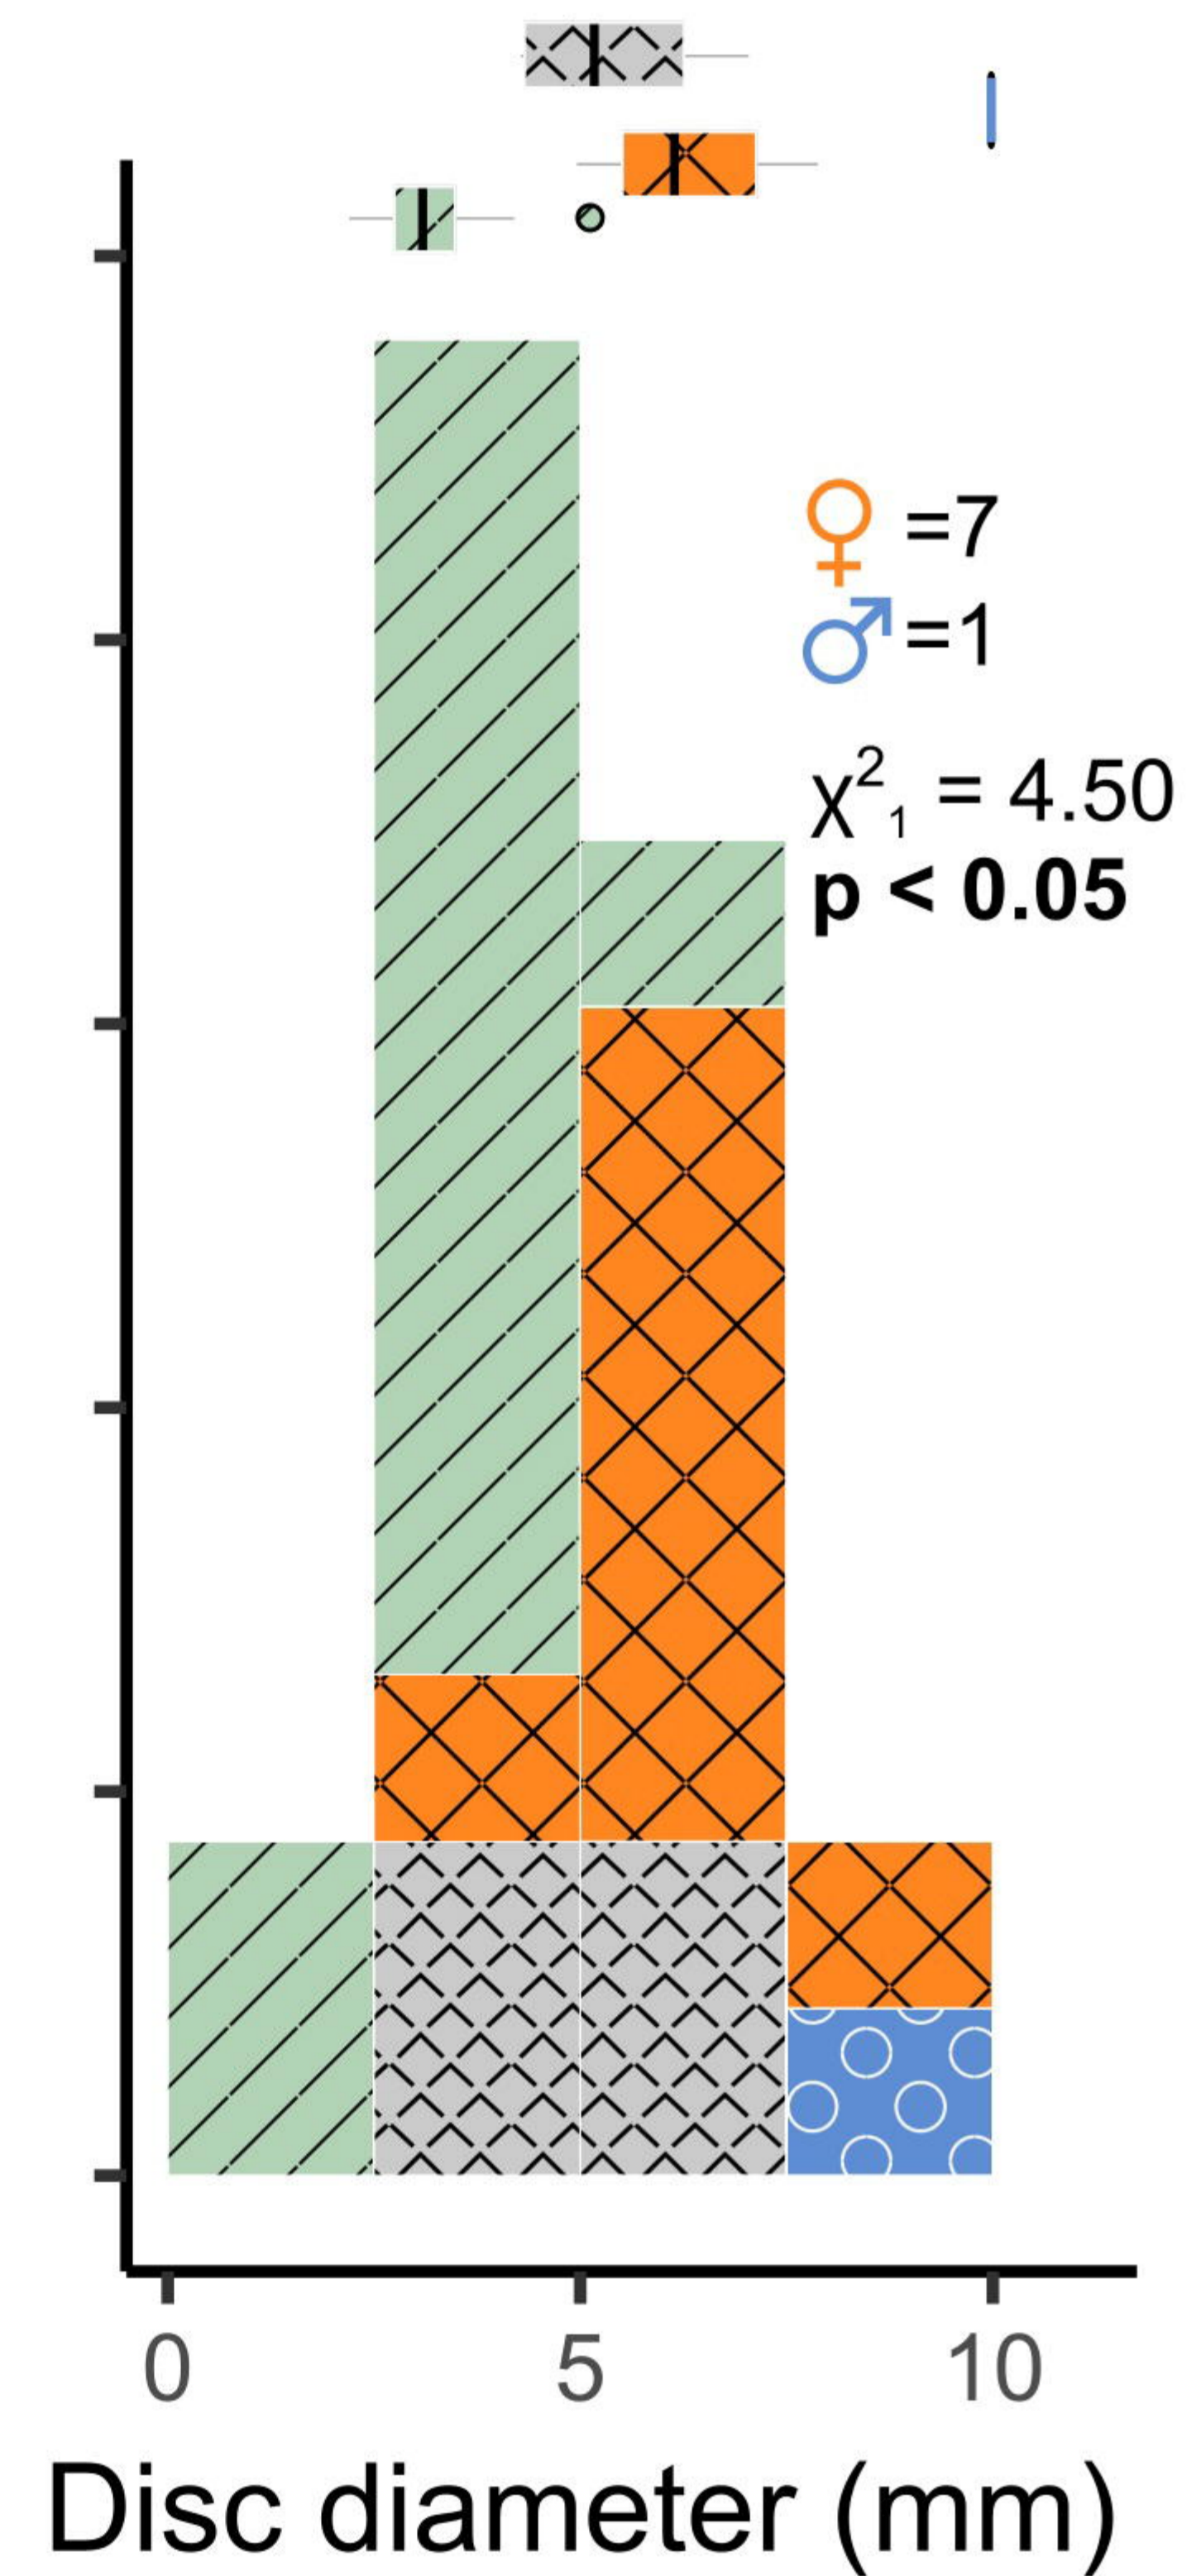



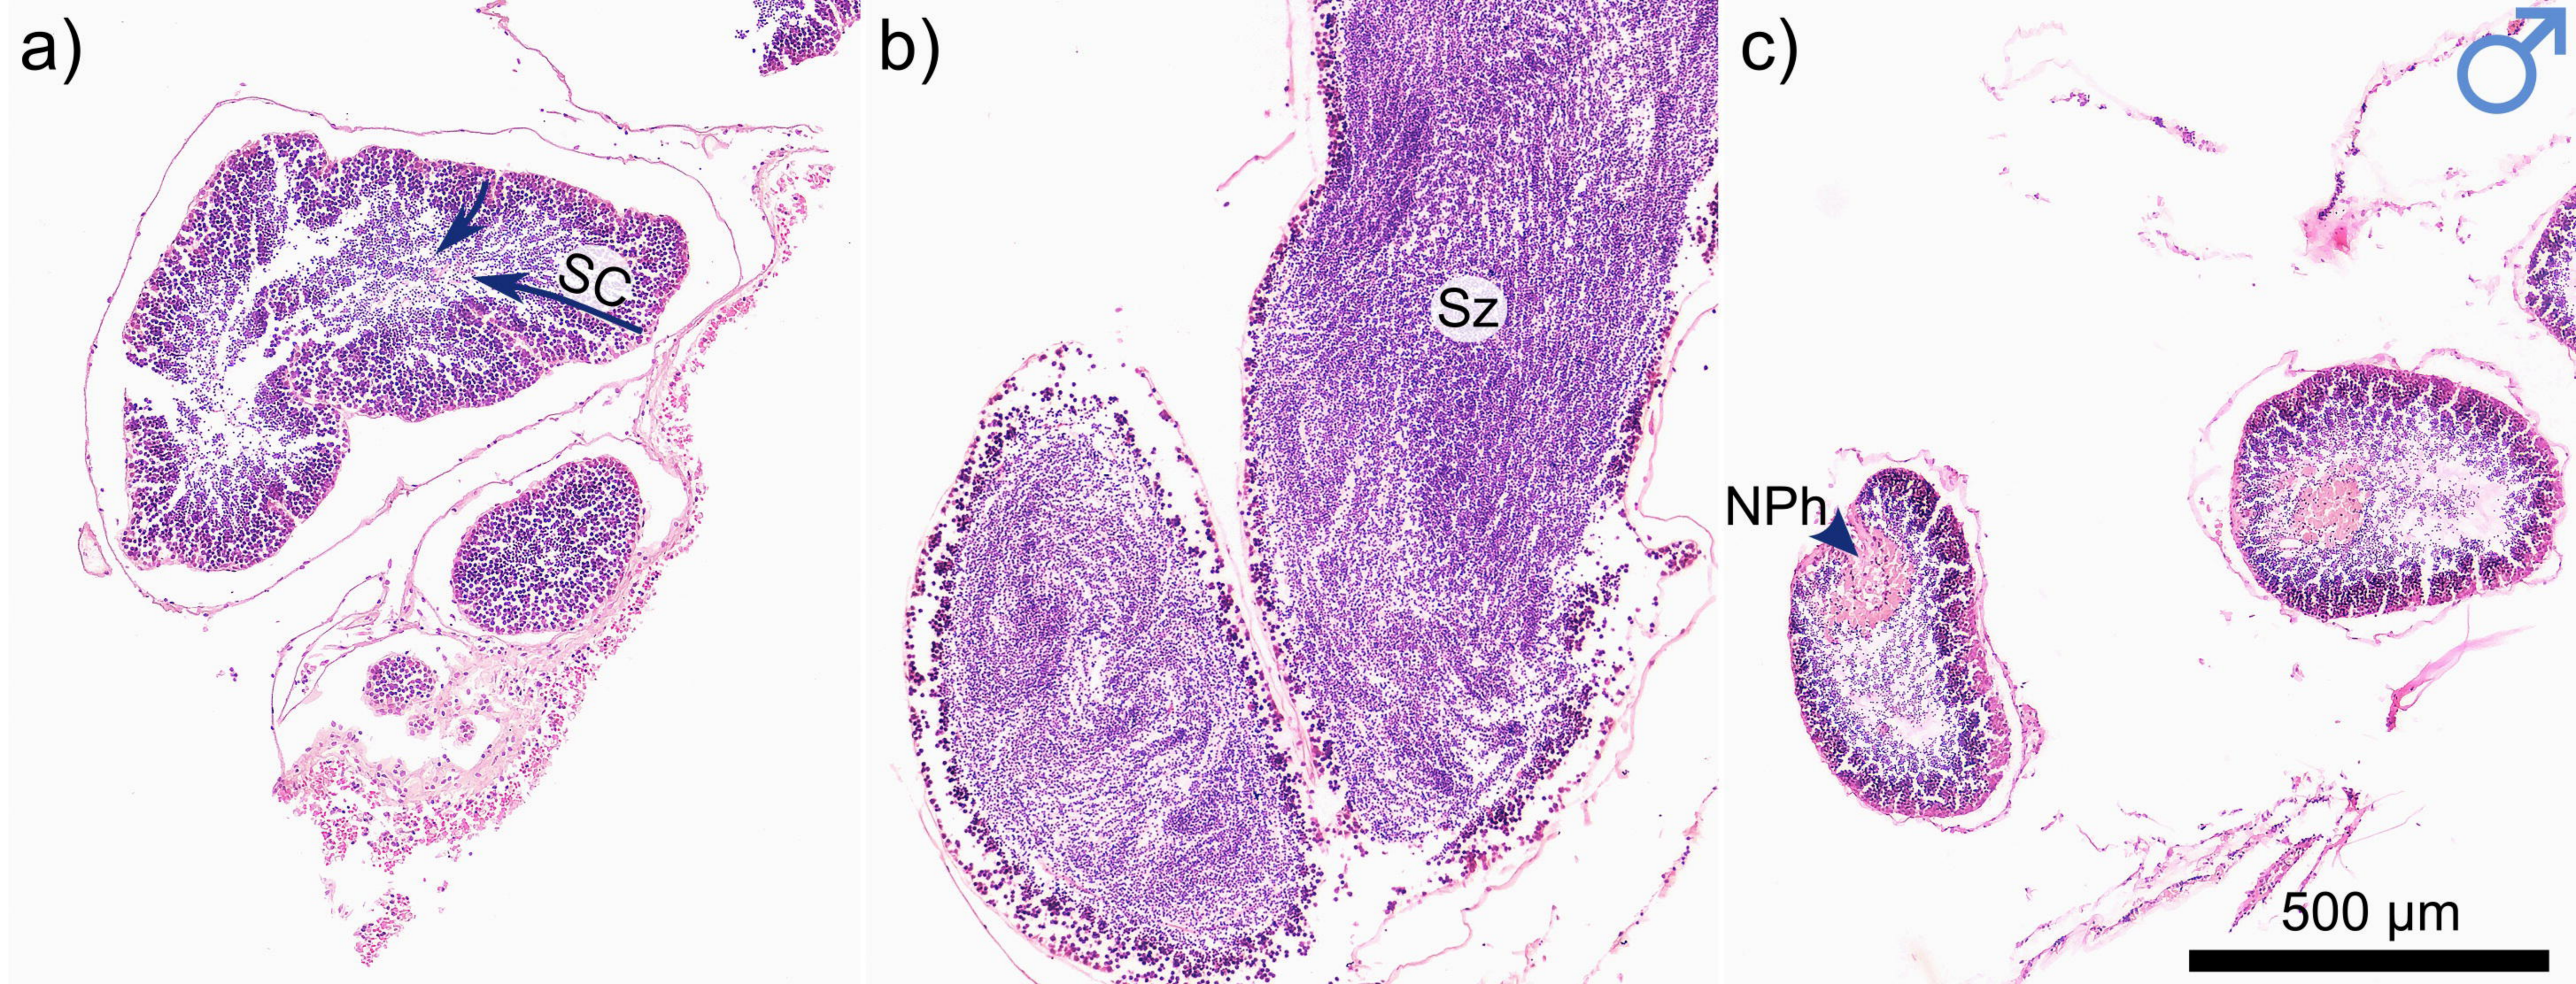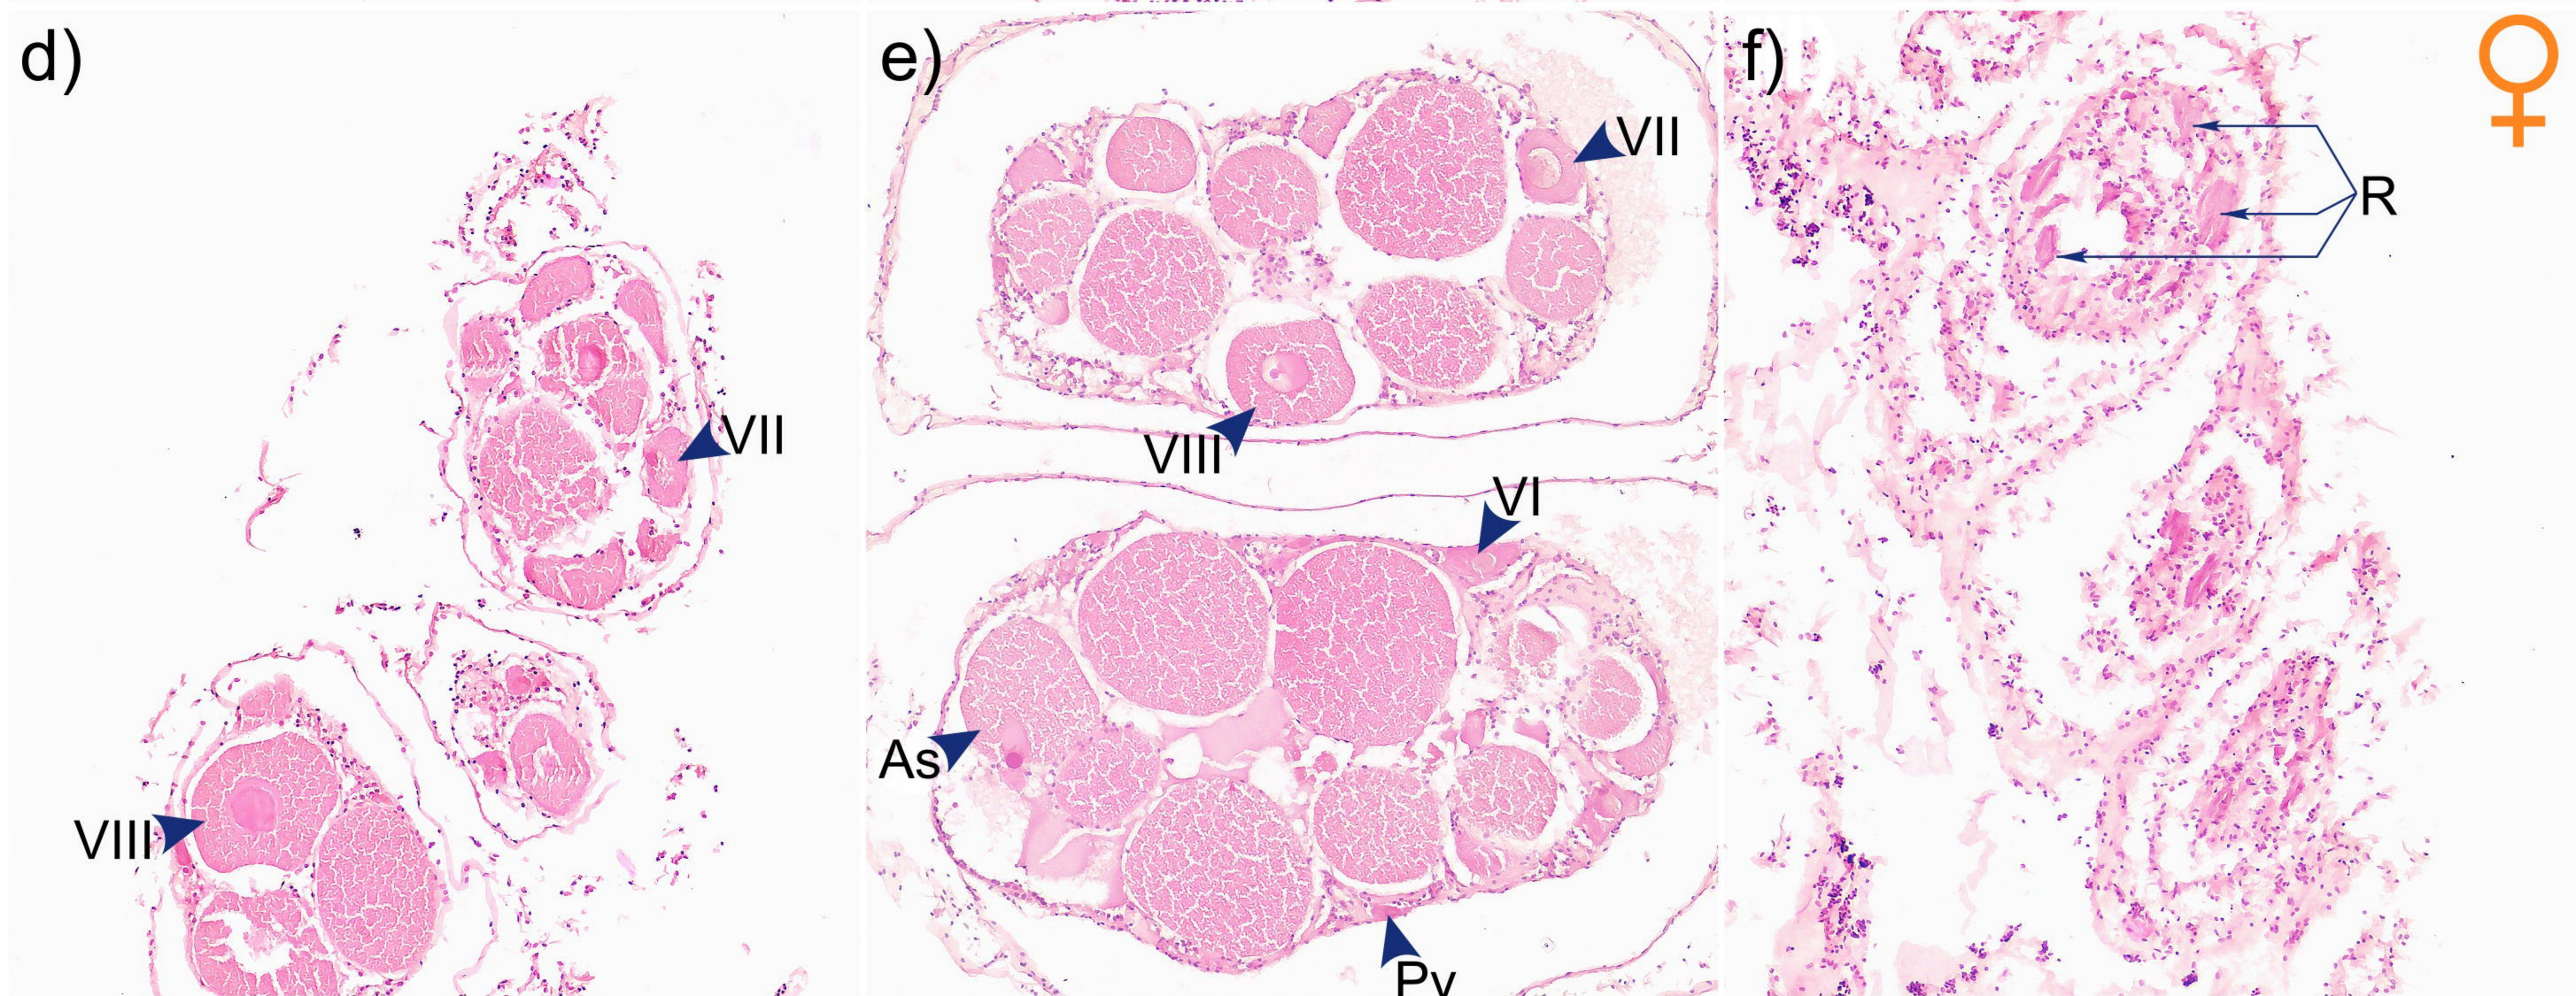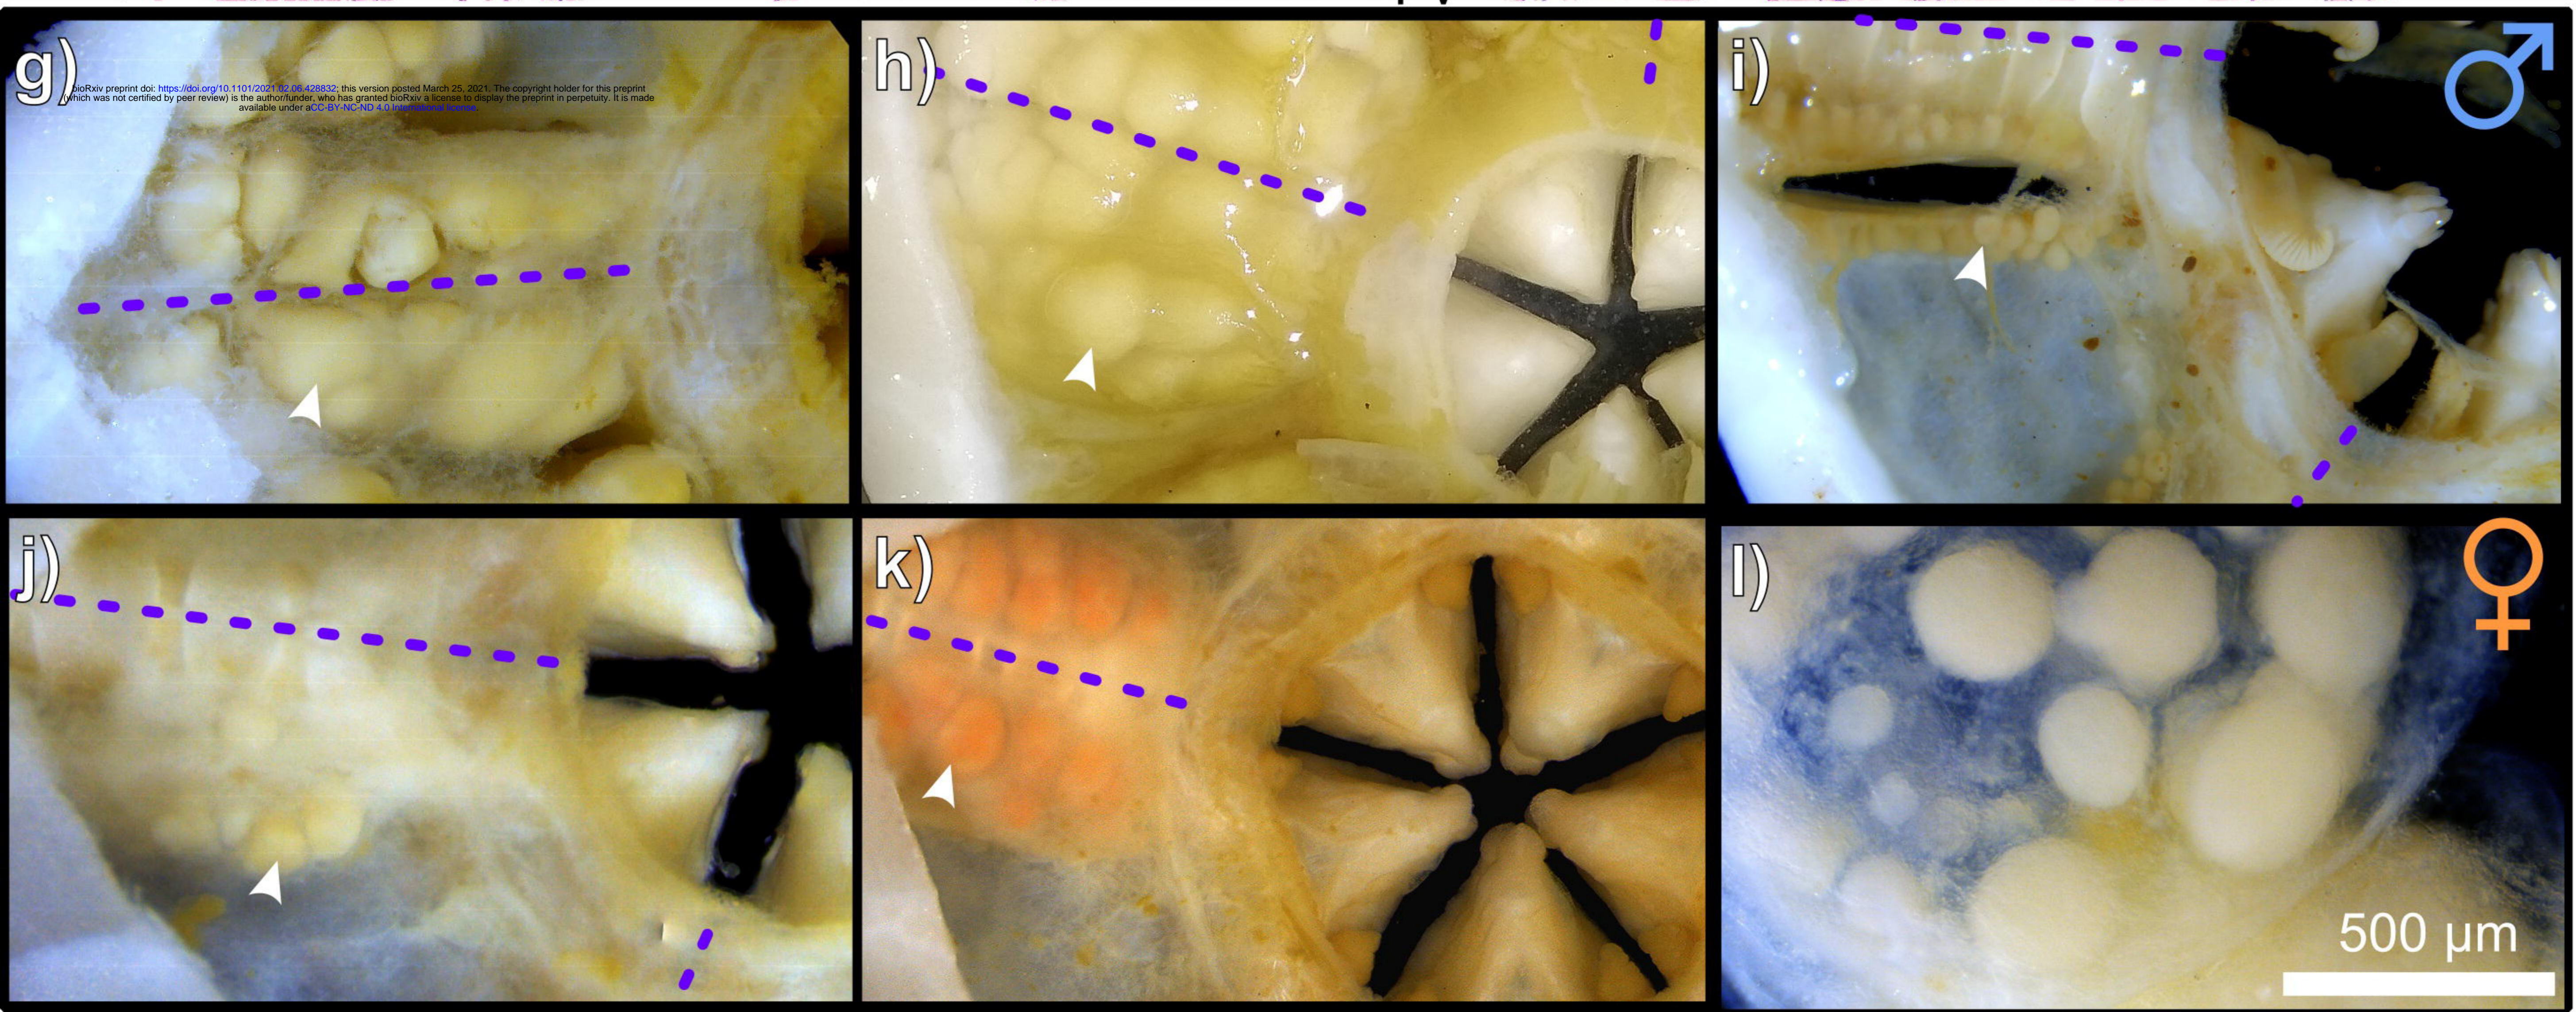

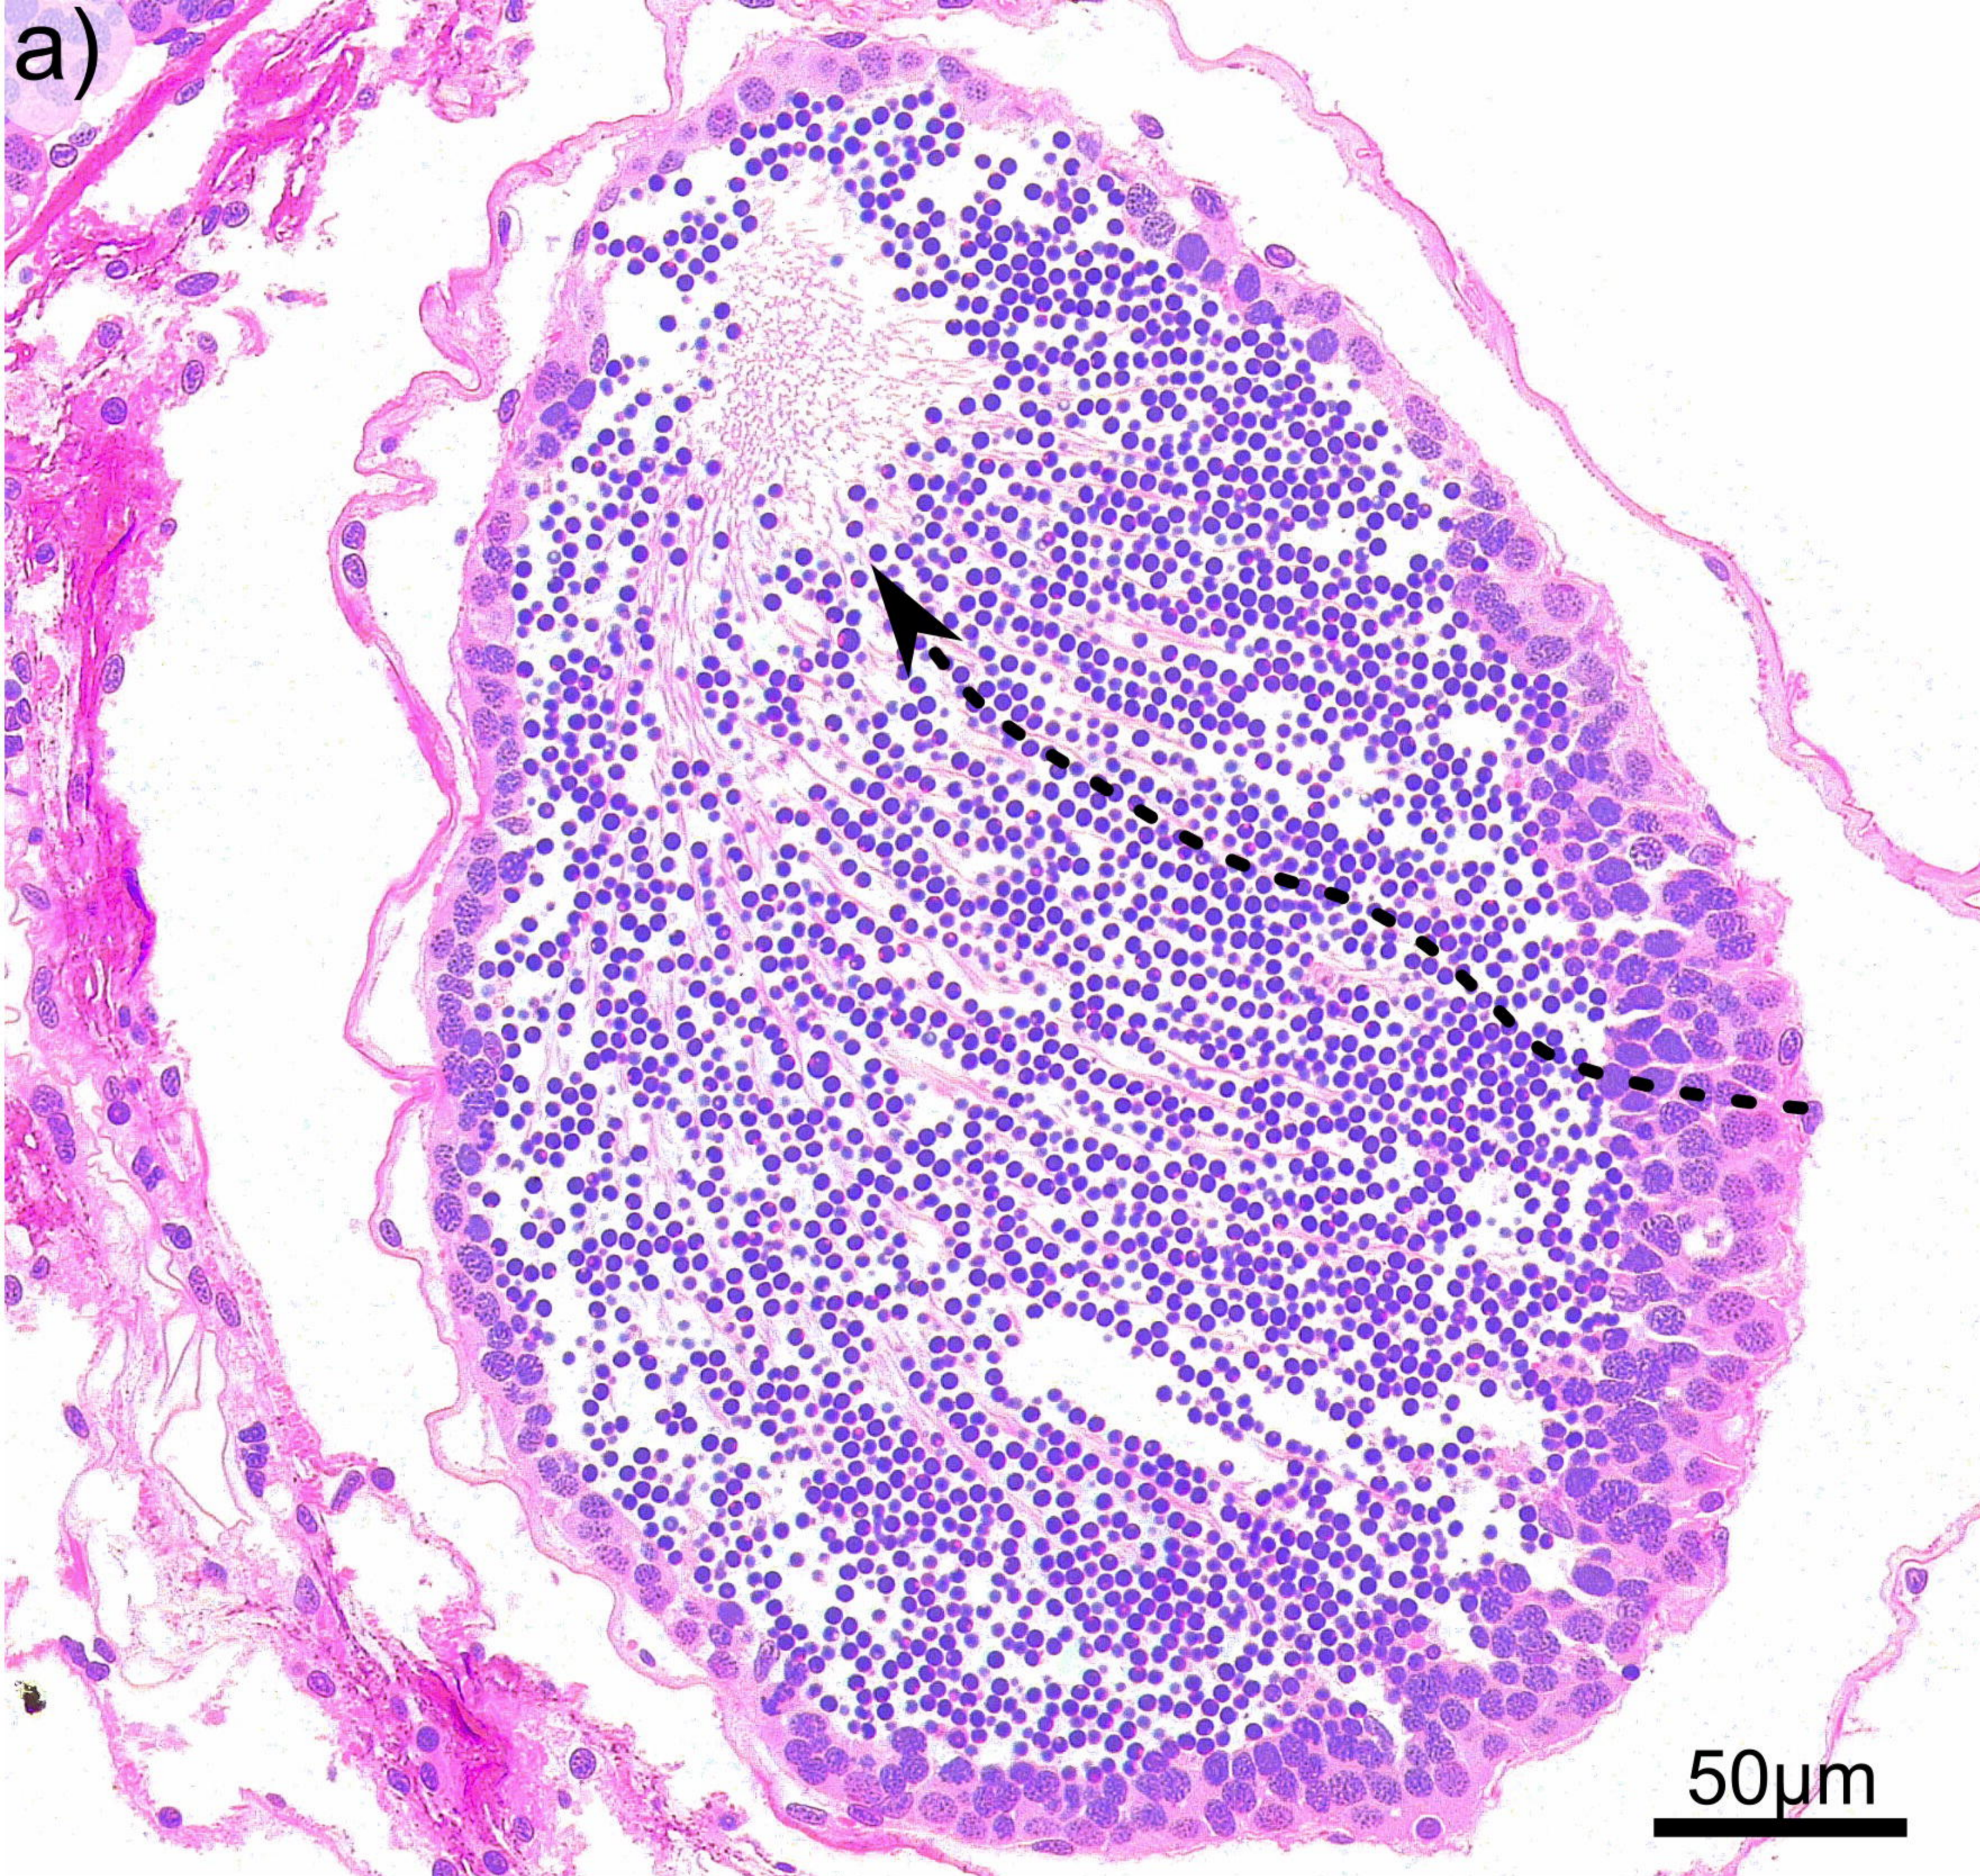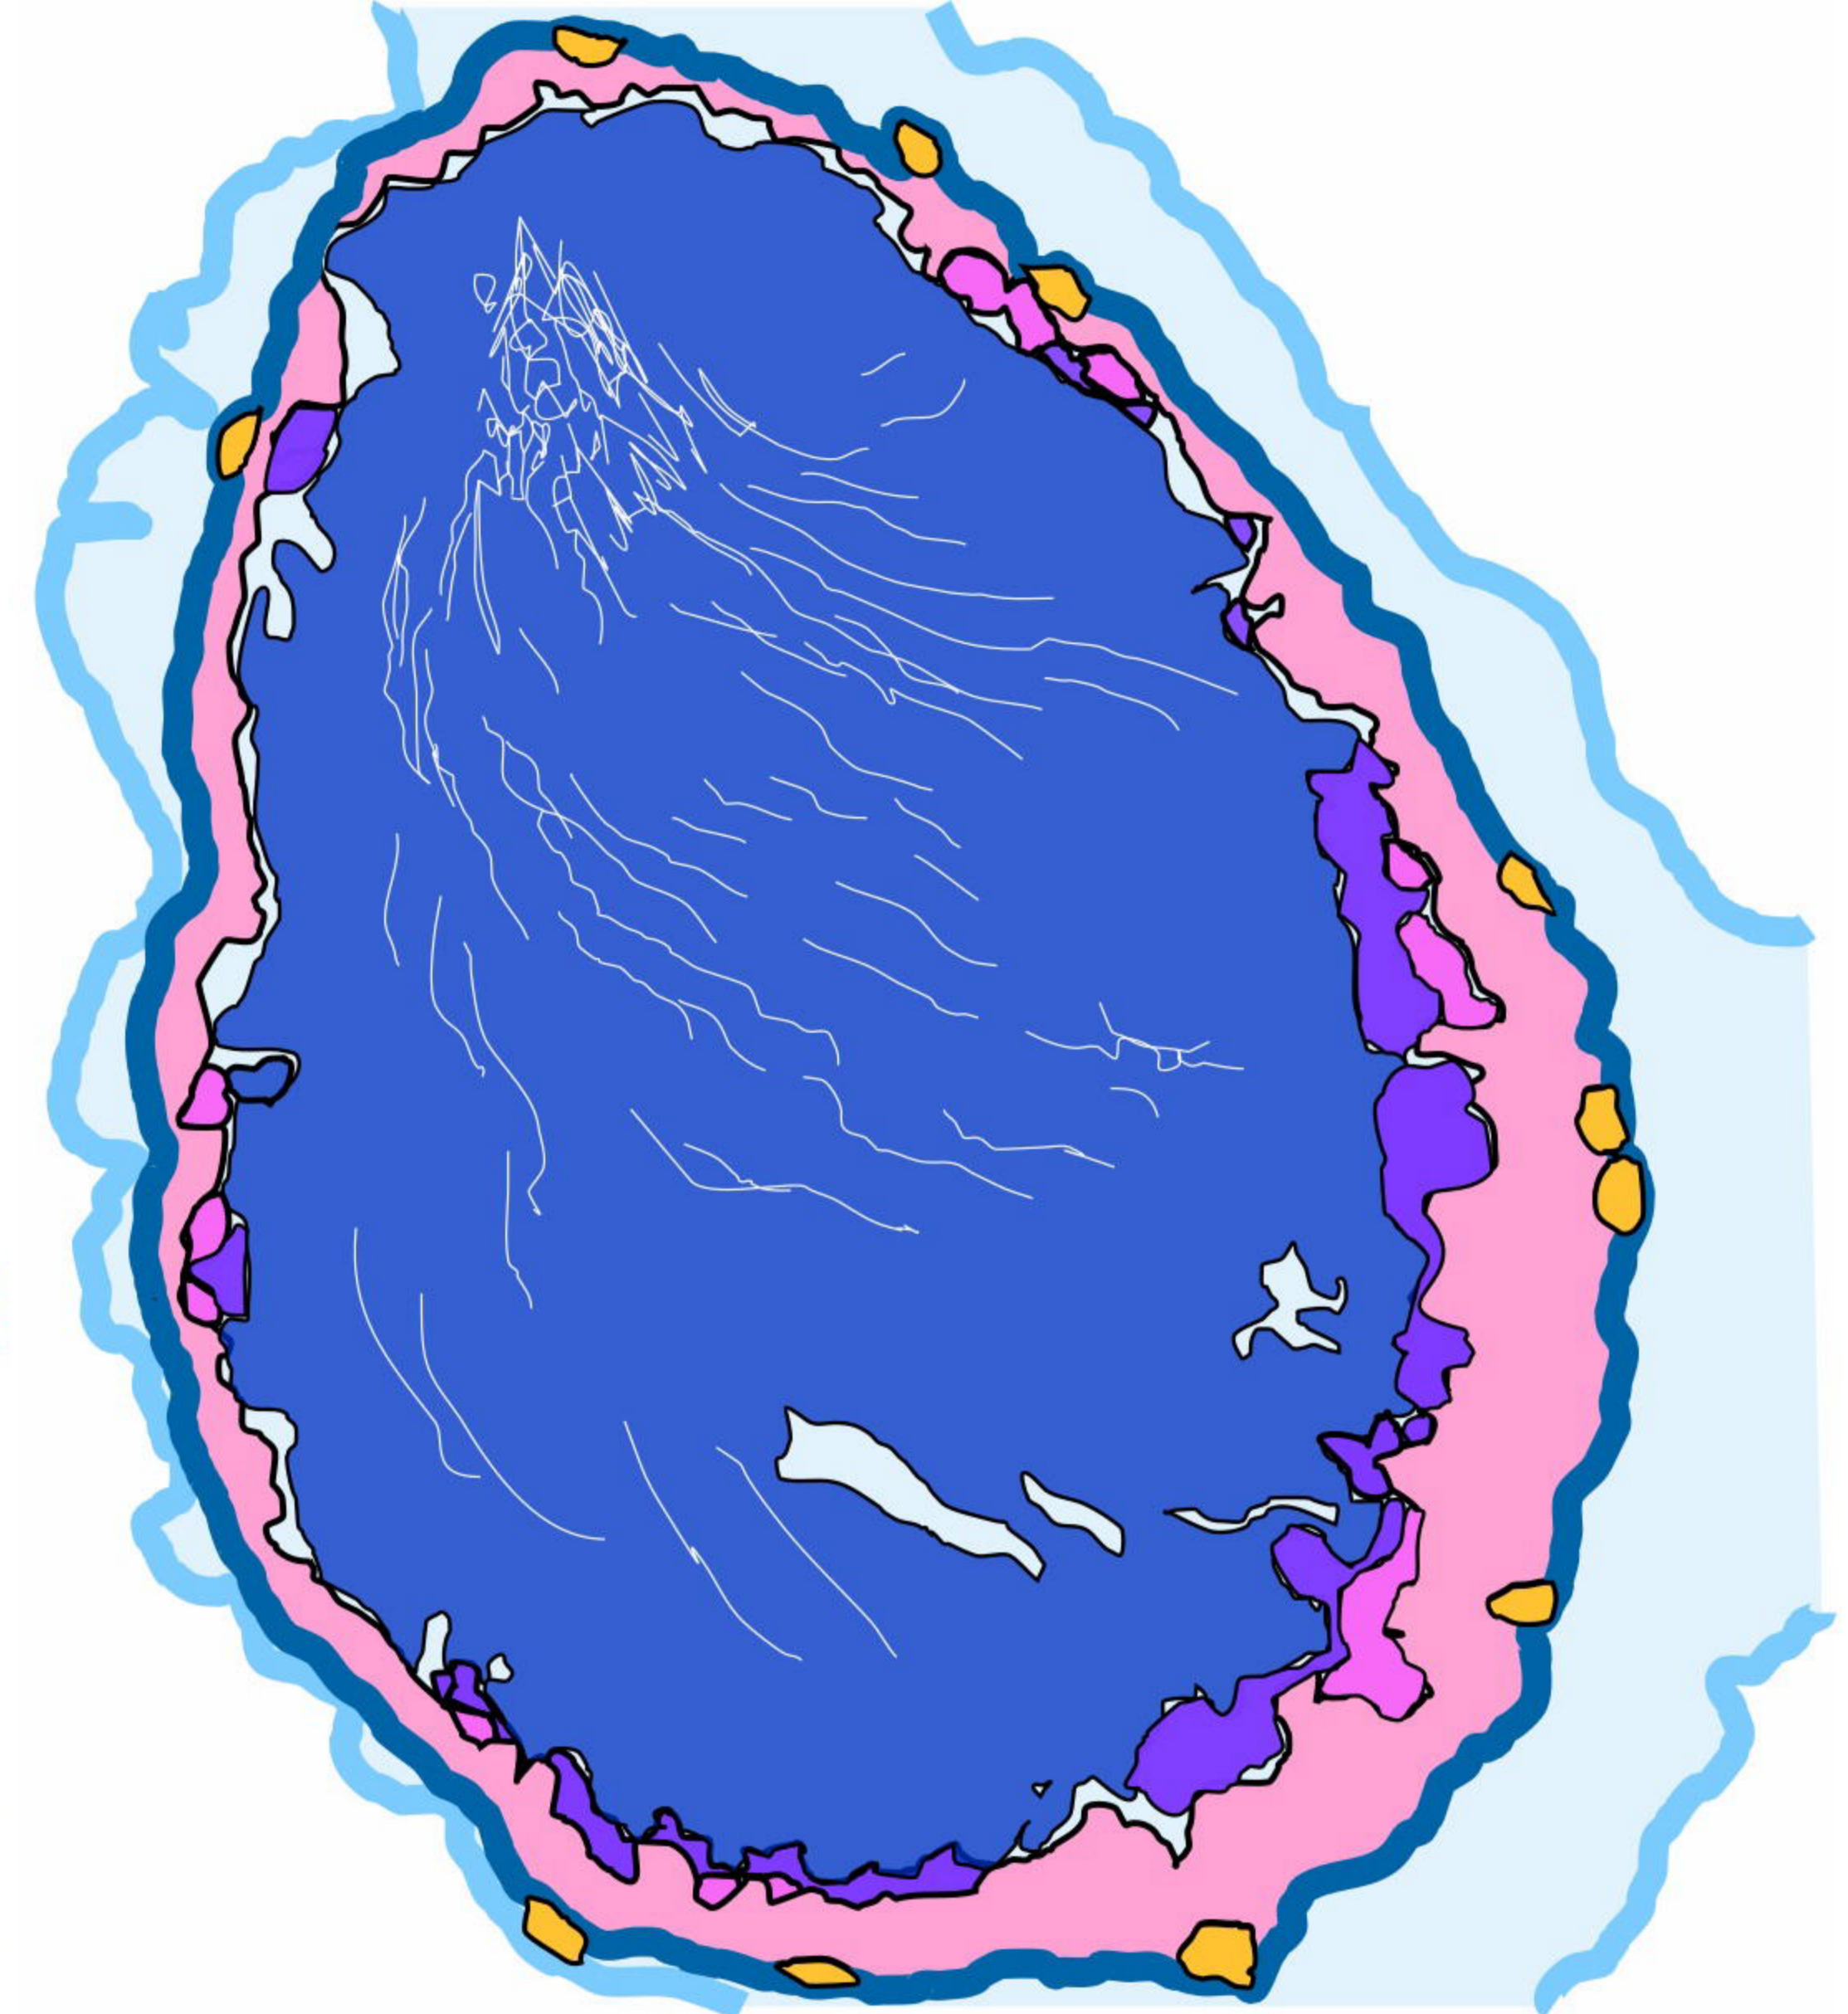

- Spermatogonia
- 1° Spermatocytes
- 2° Spermatocytes
- Spermatids
- Spermatozoa

- Inner-sac membrane
- Outer-sac membrane

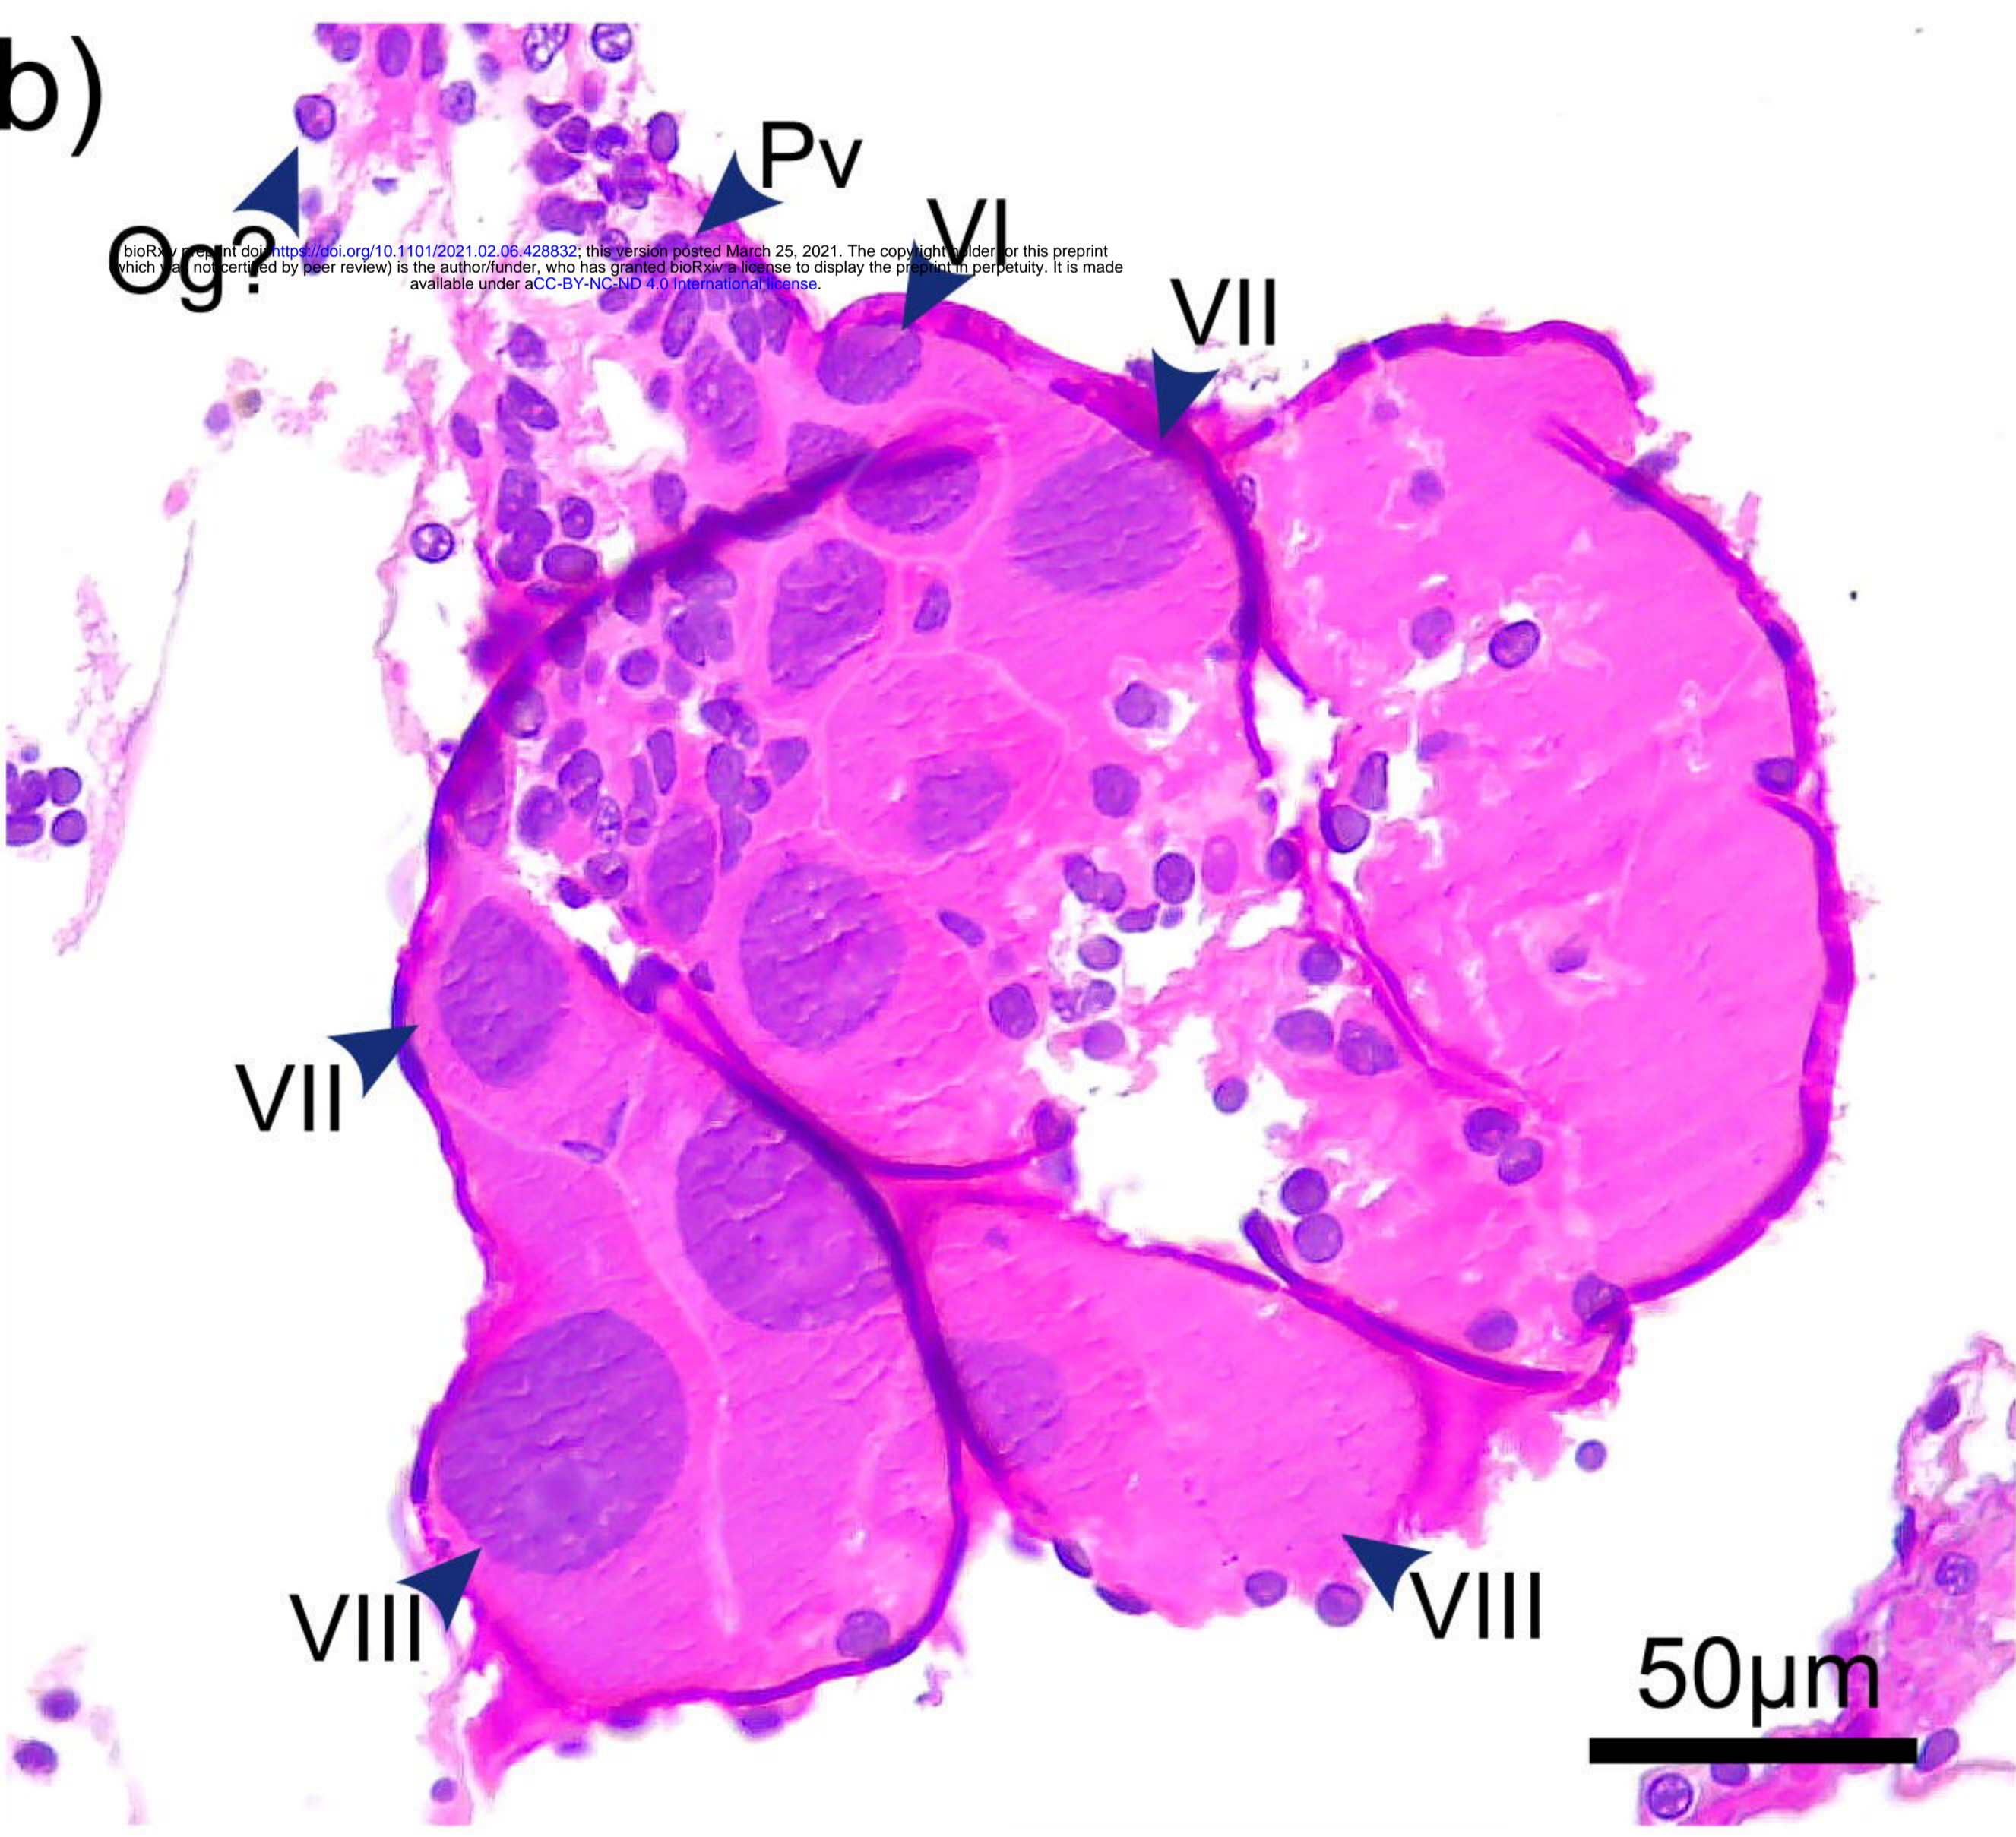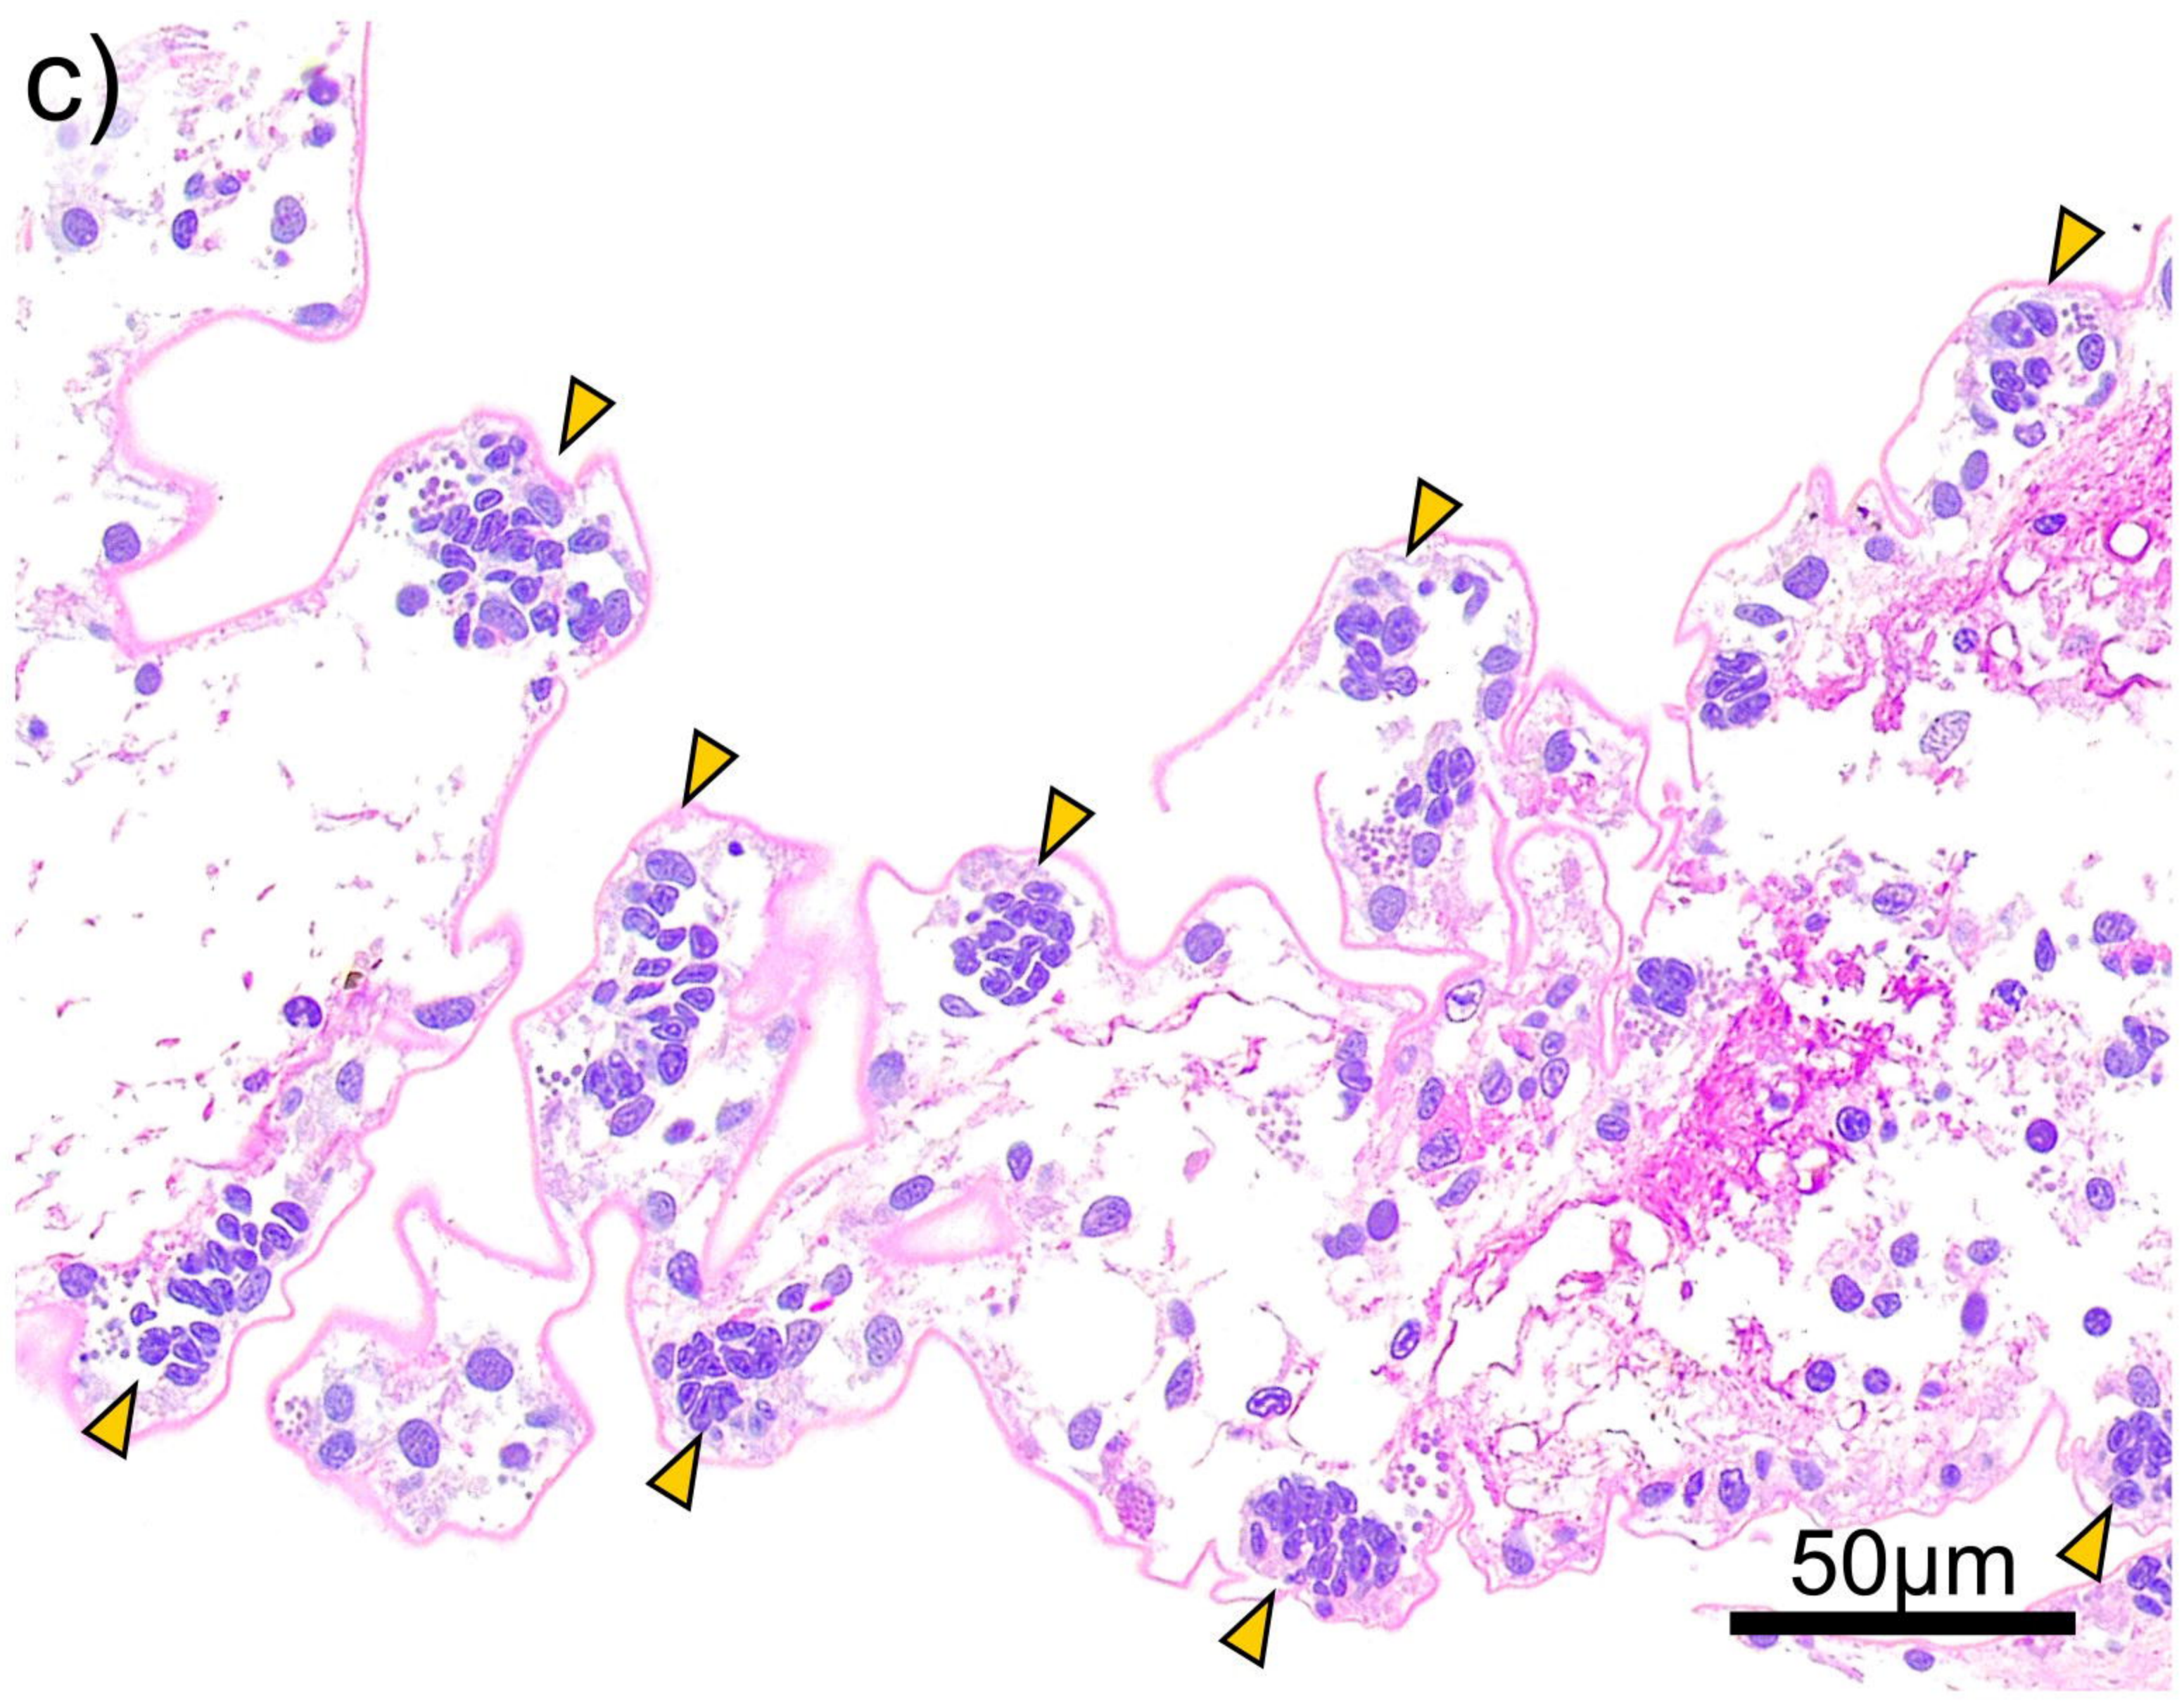

a) *Ophiosphalma glabrum*

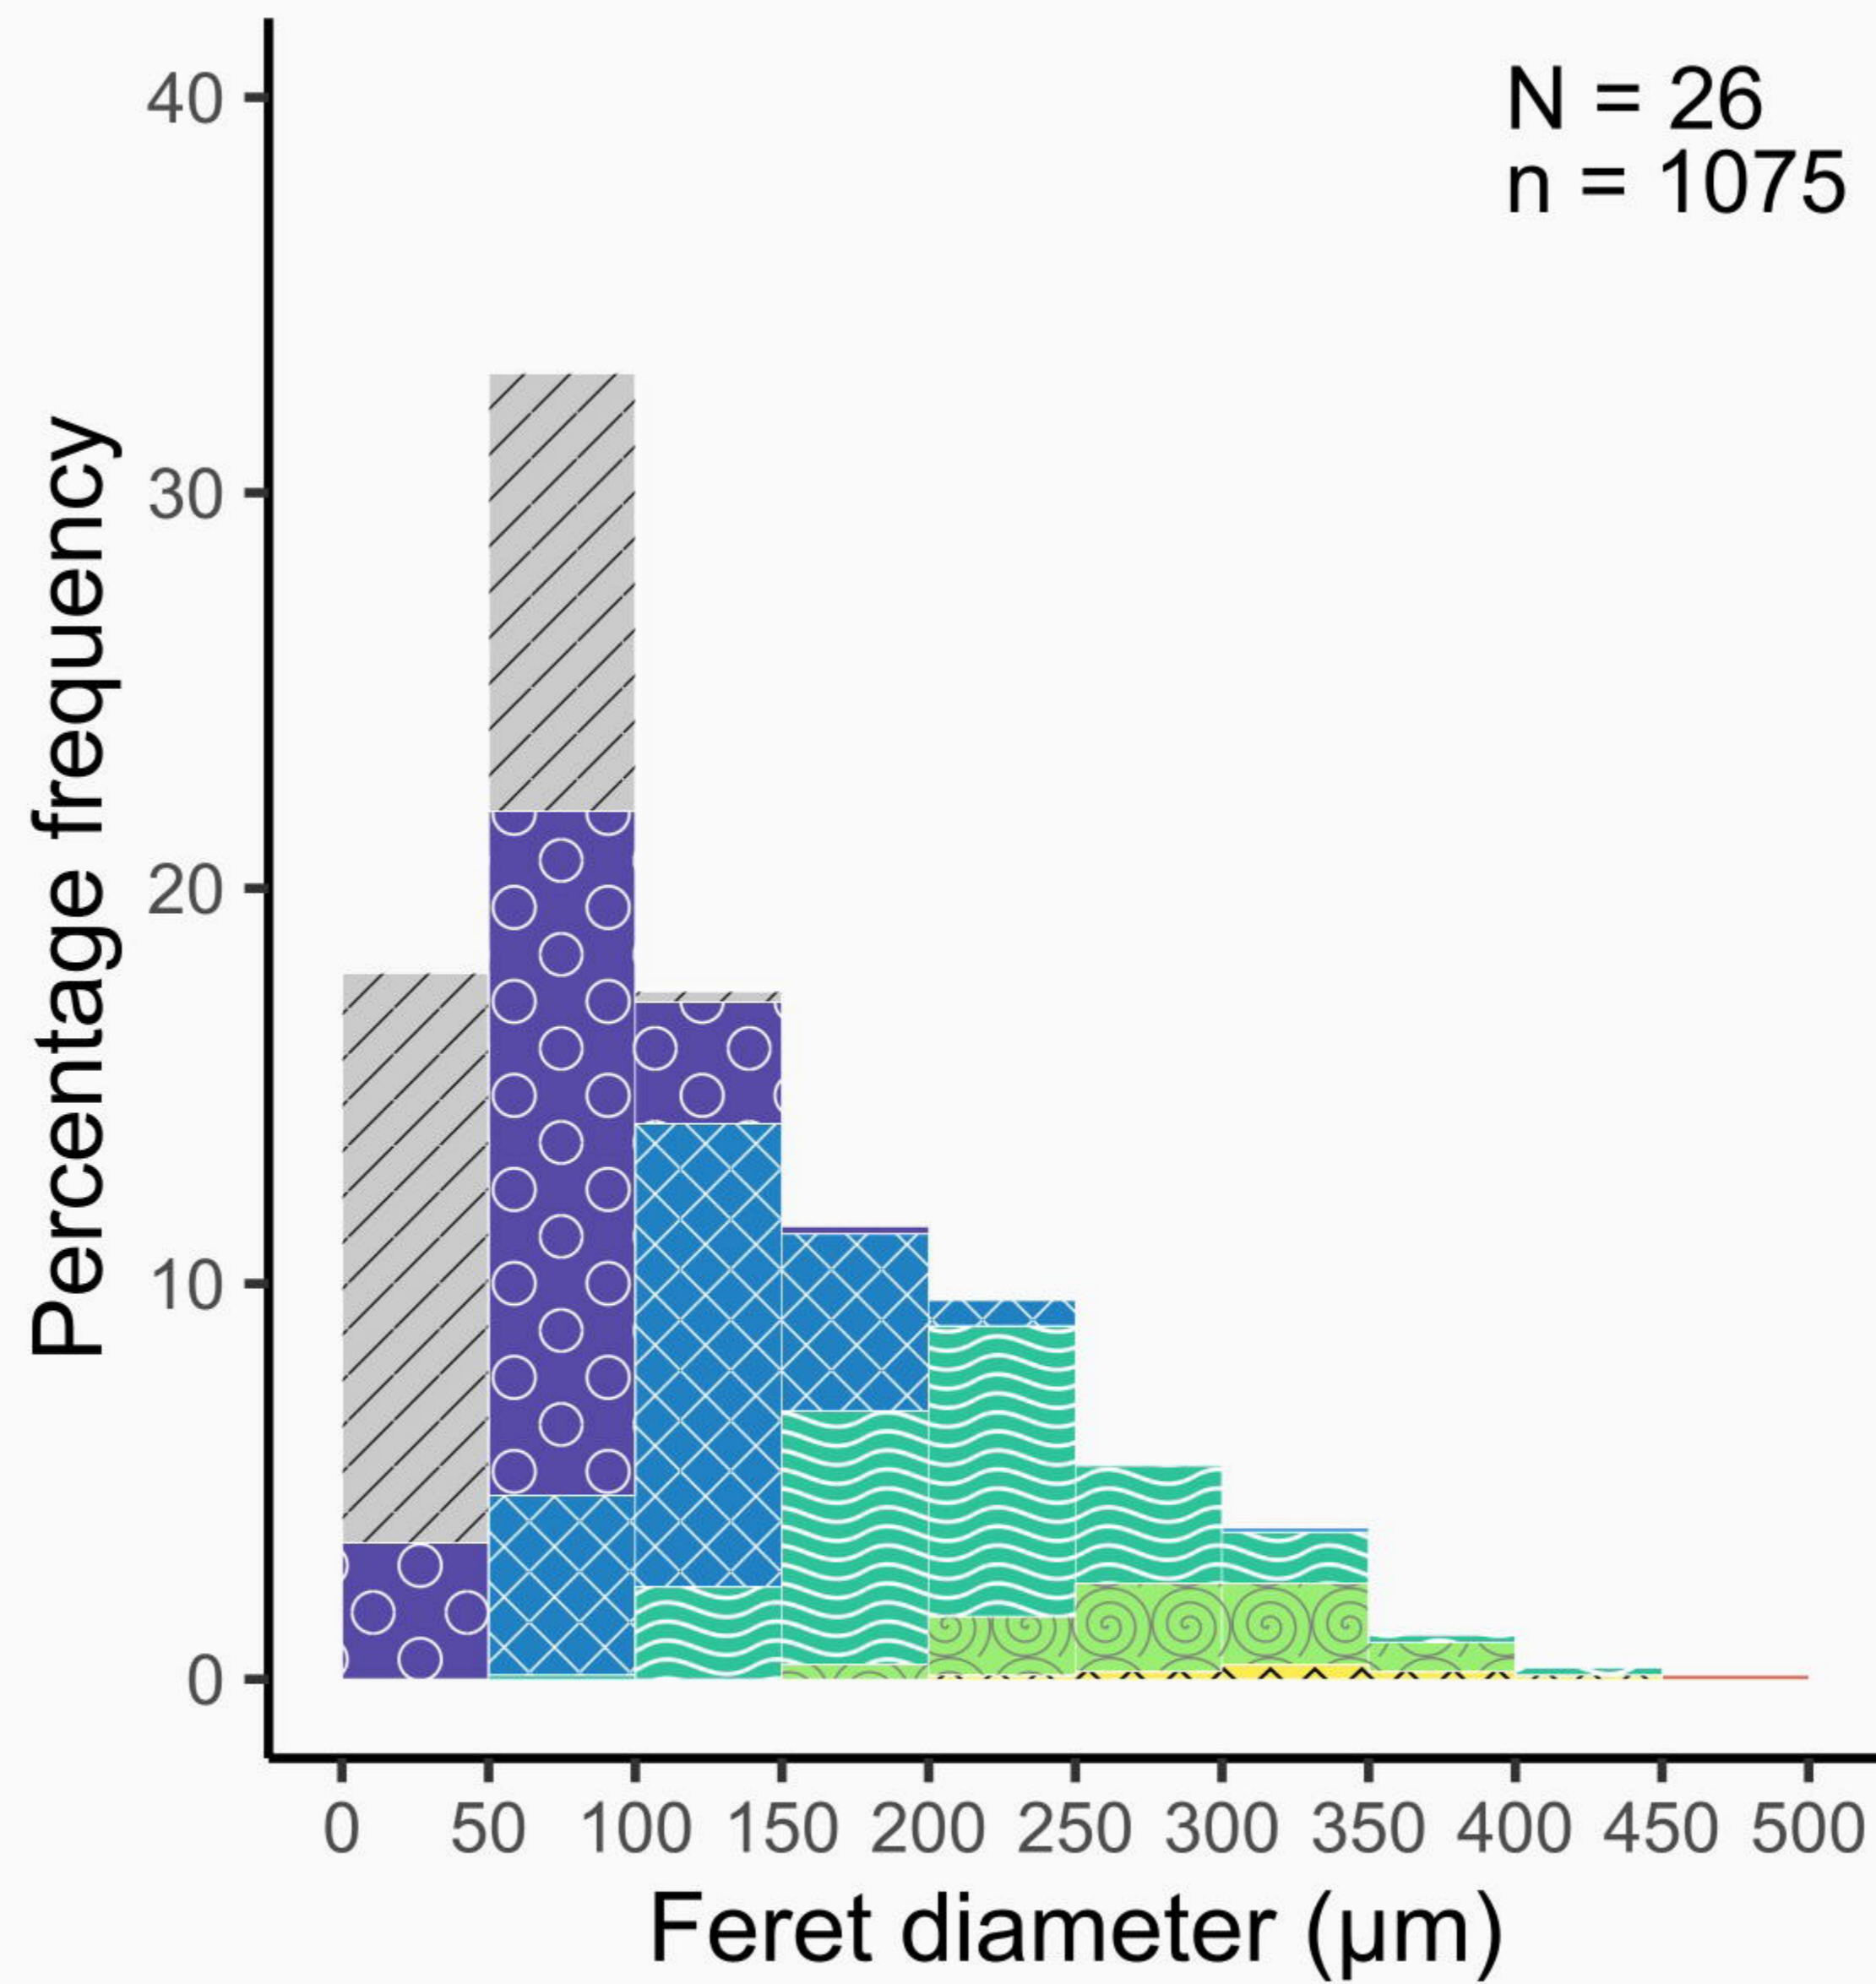

d) *Ophiacantha cosmica*

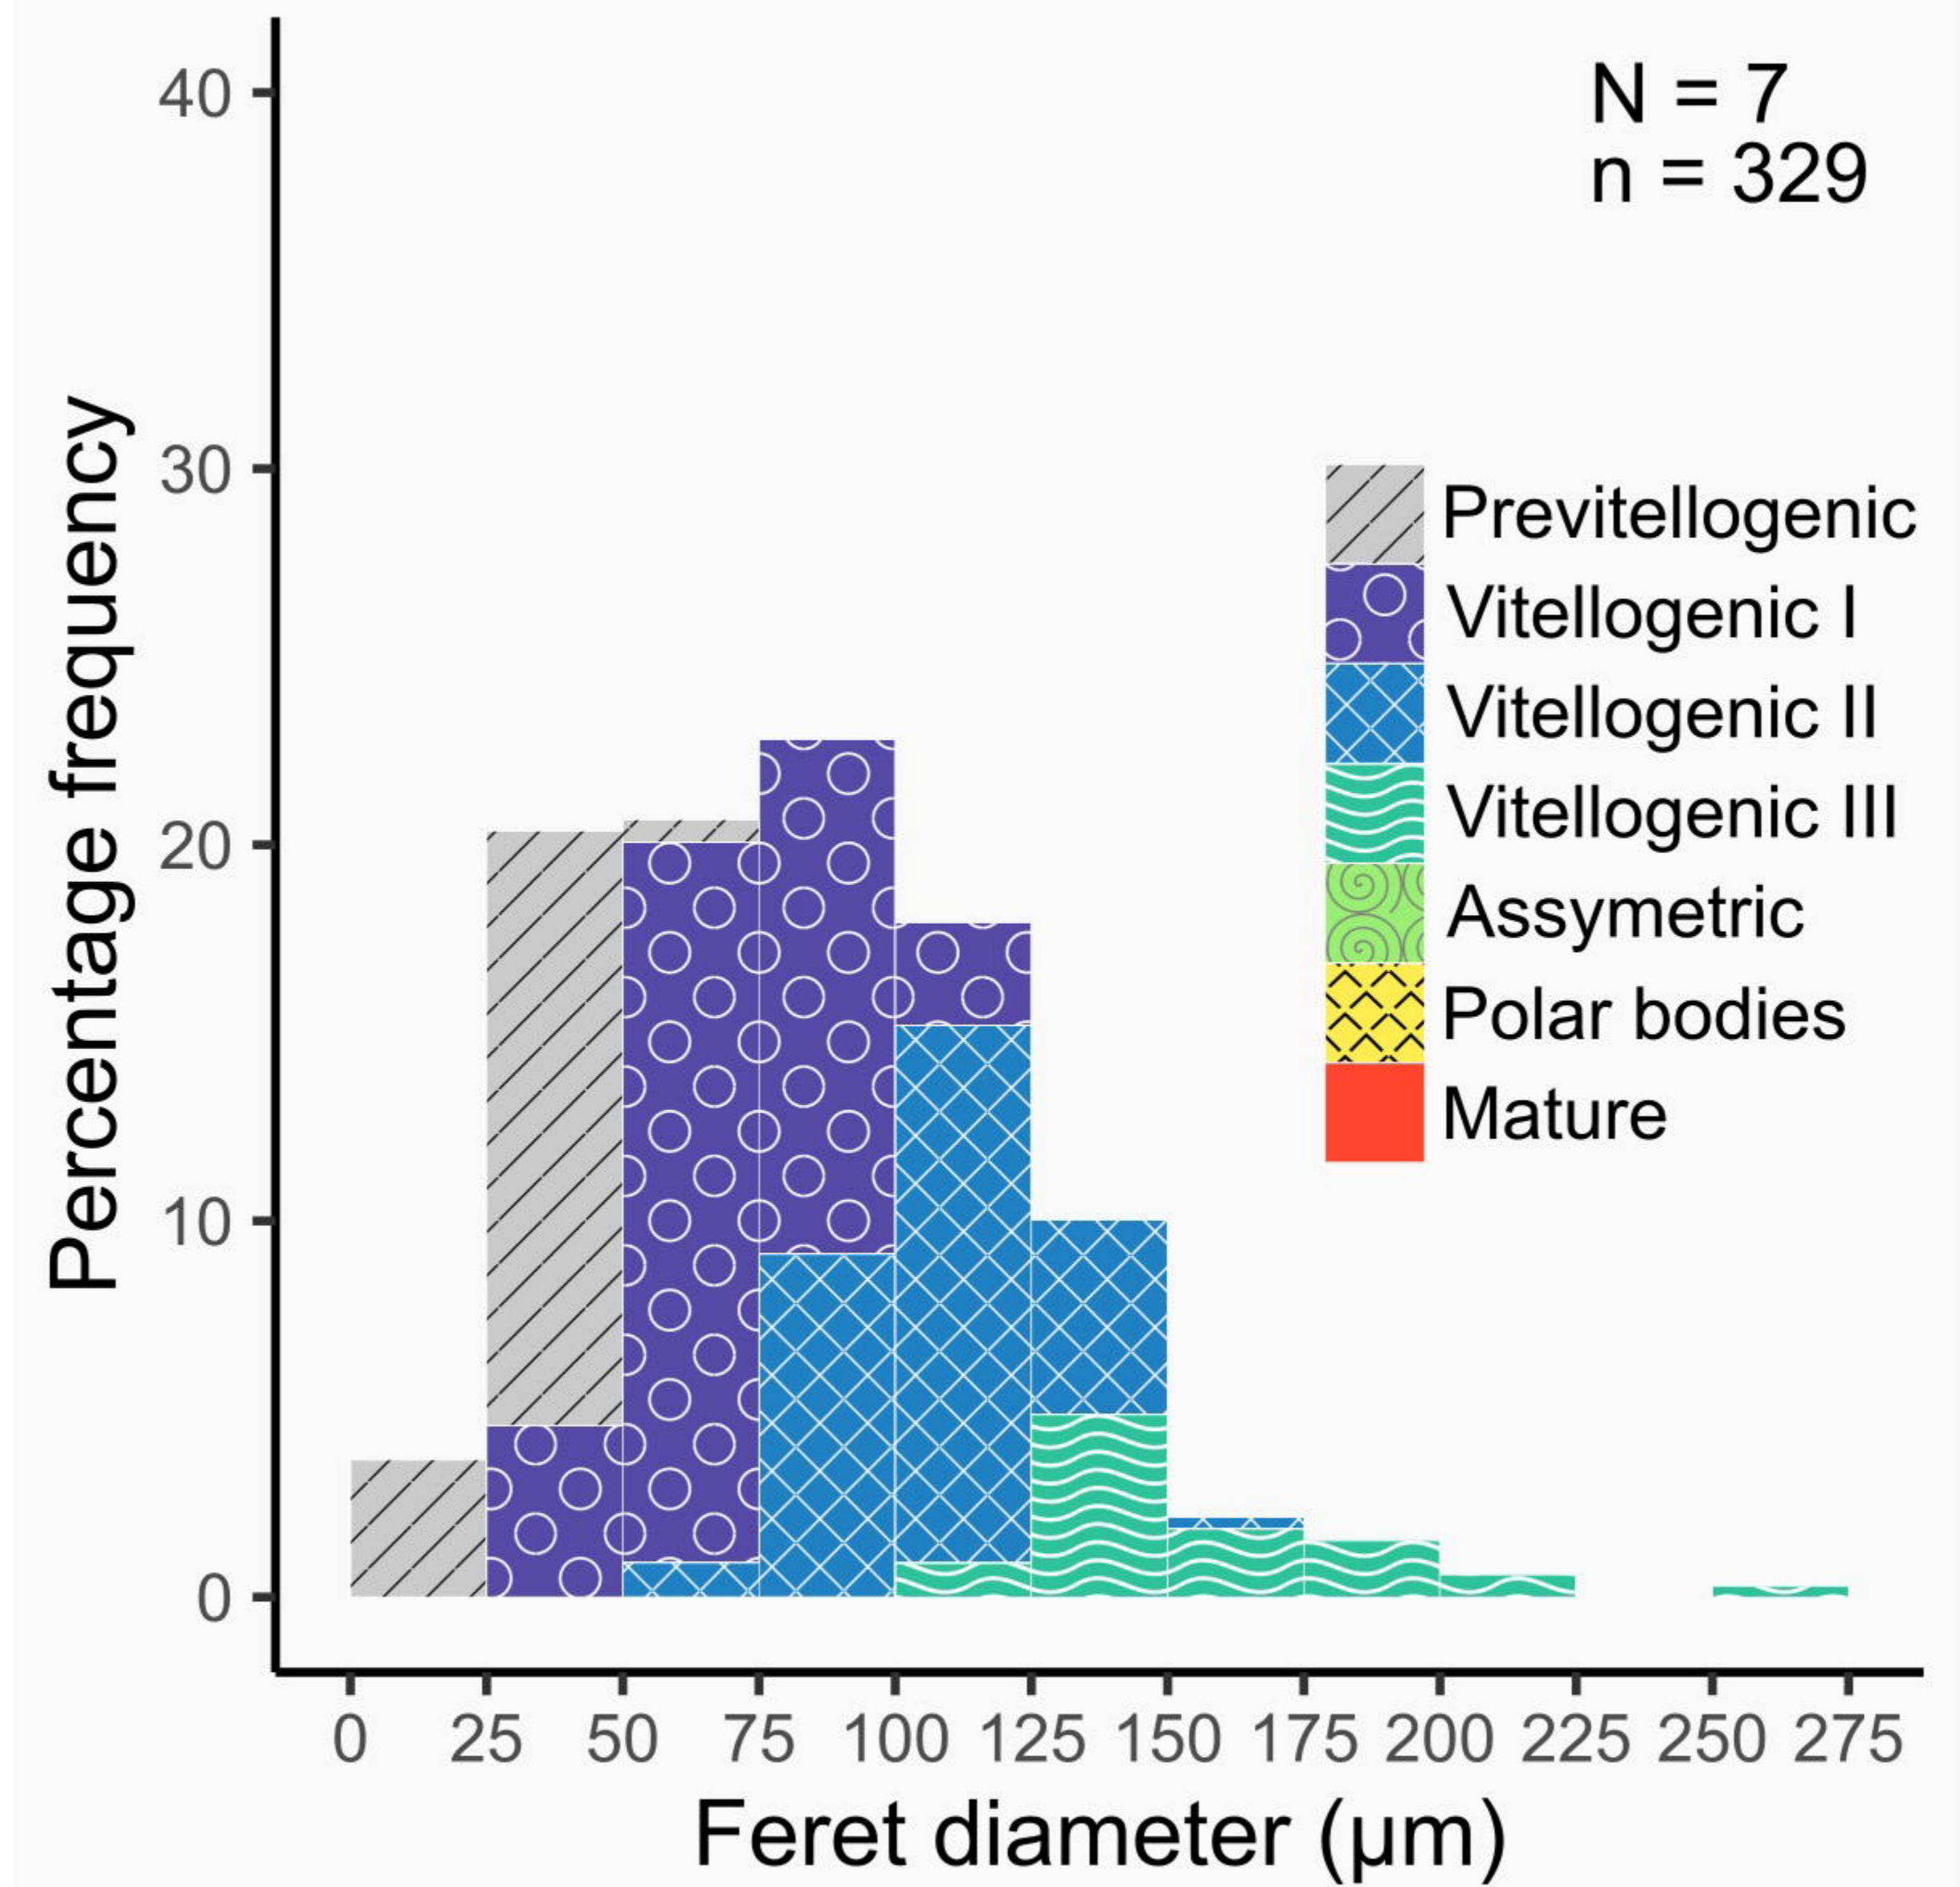

b) *O. glabrum* (by year)

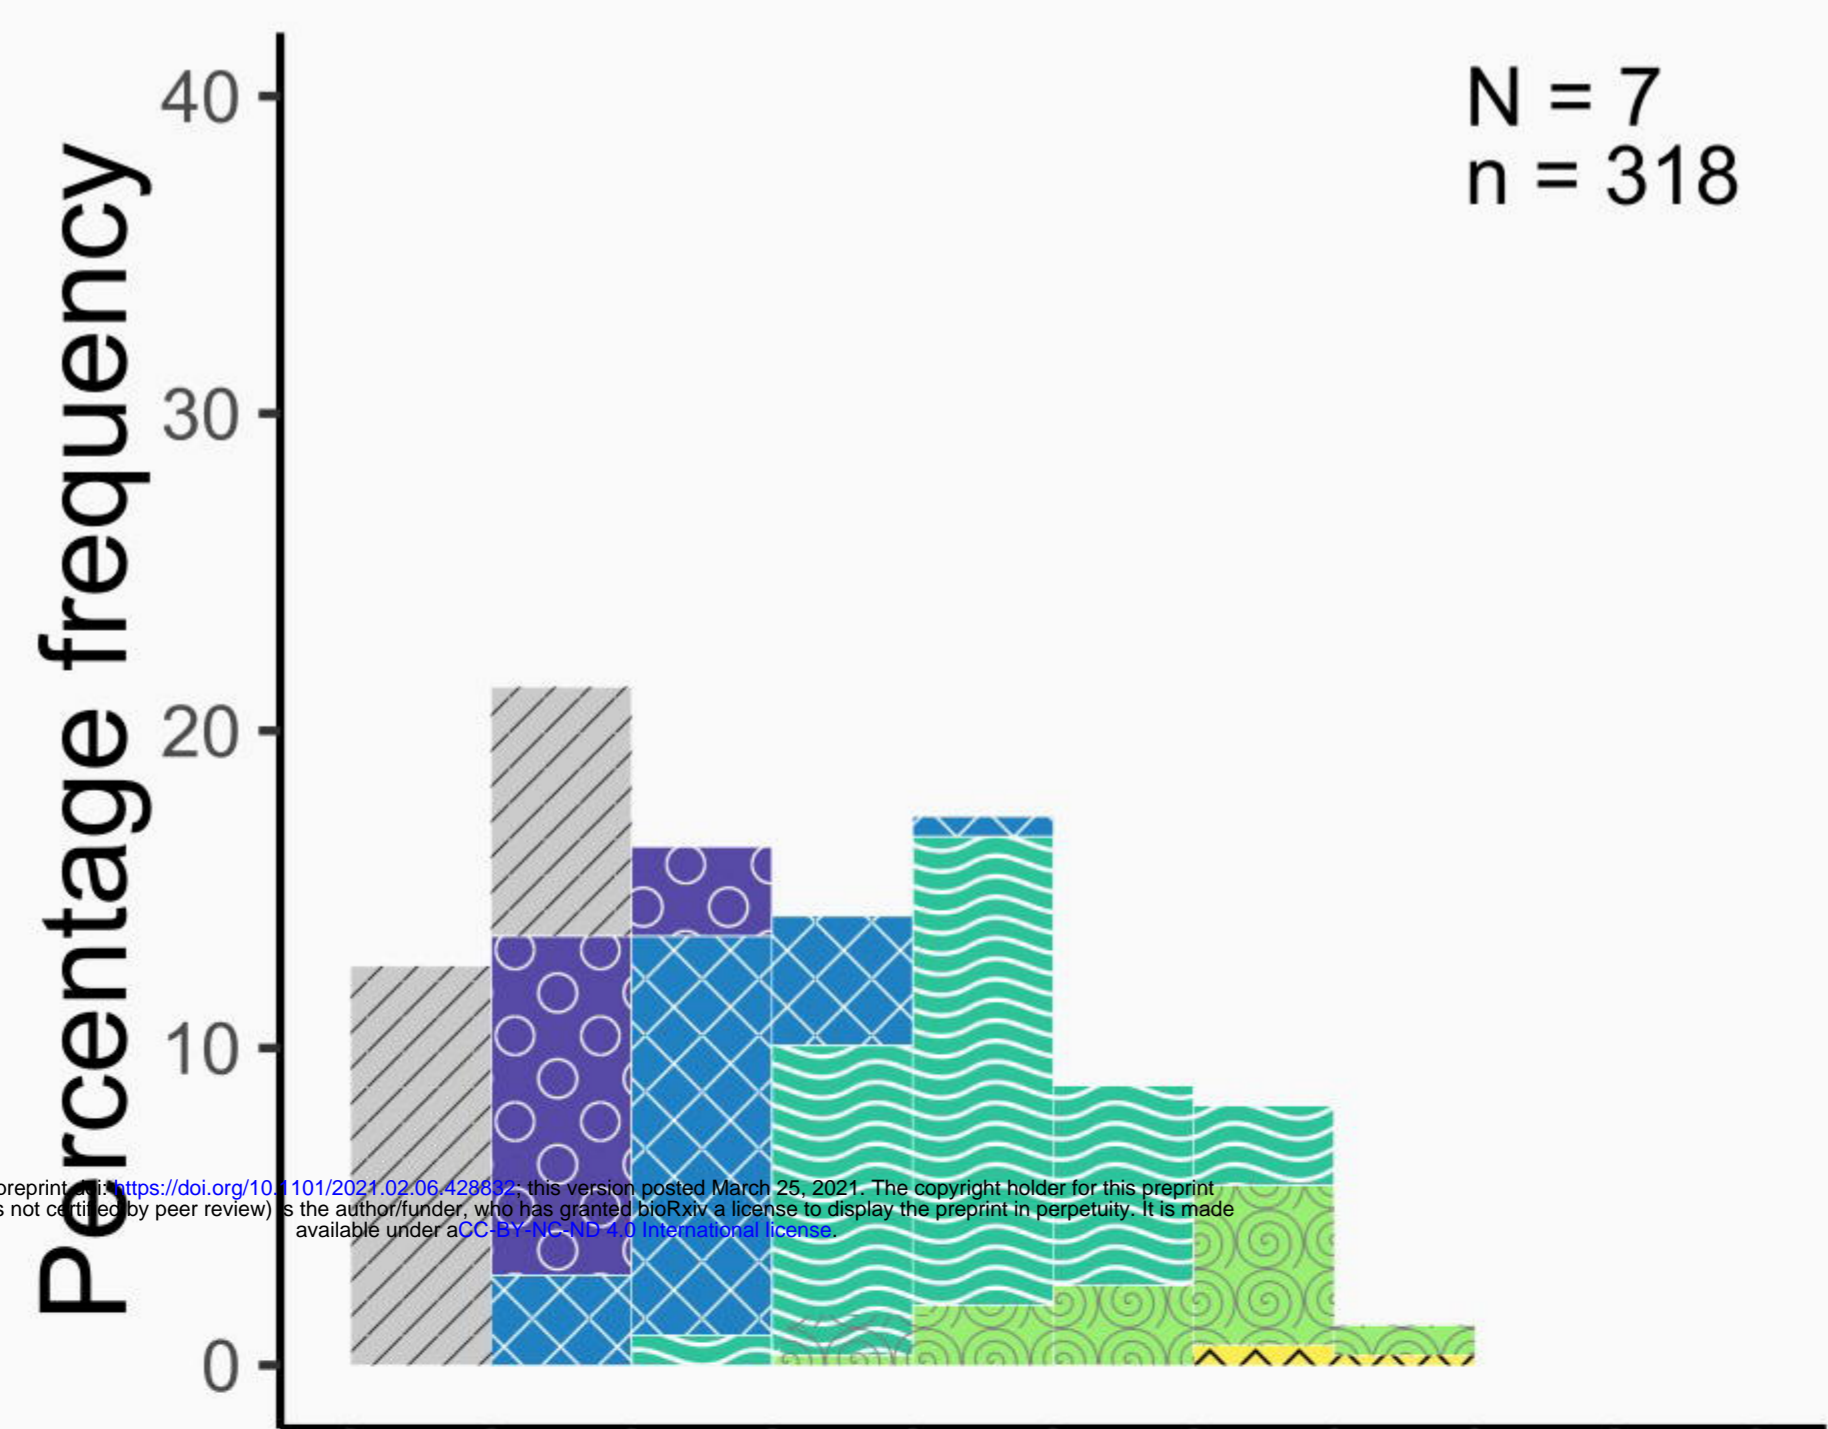

c) *O. glabrum* (year / area)

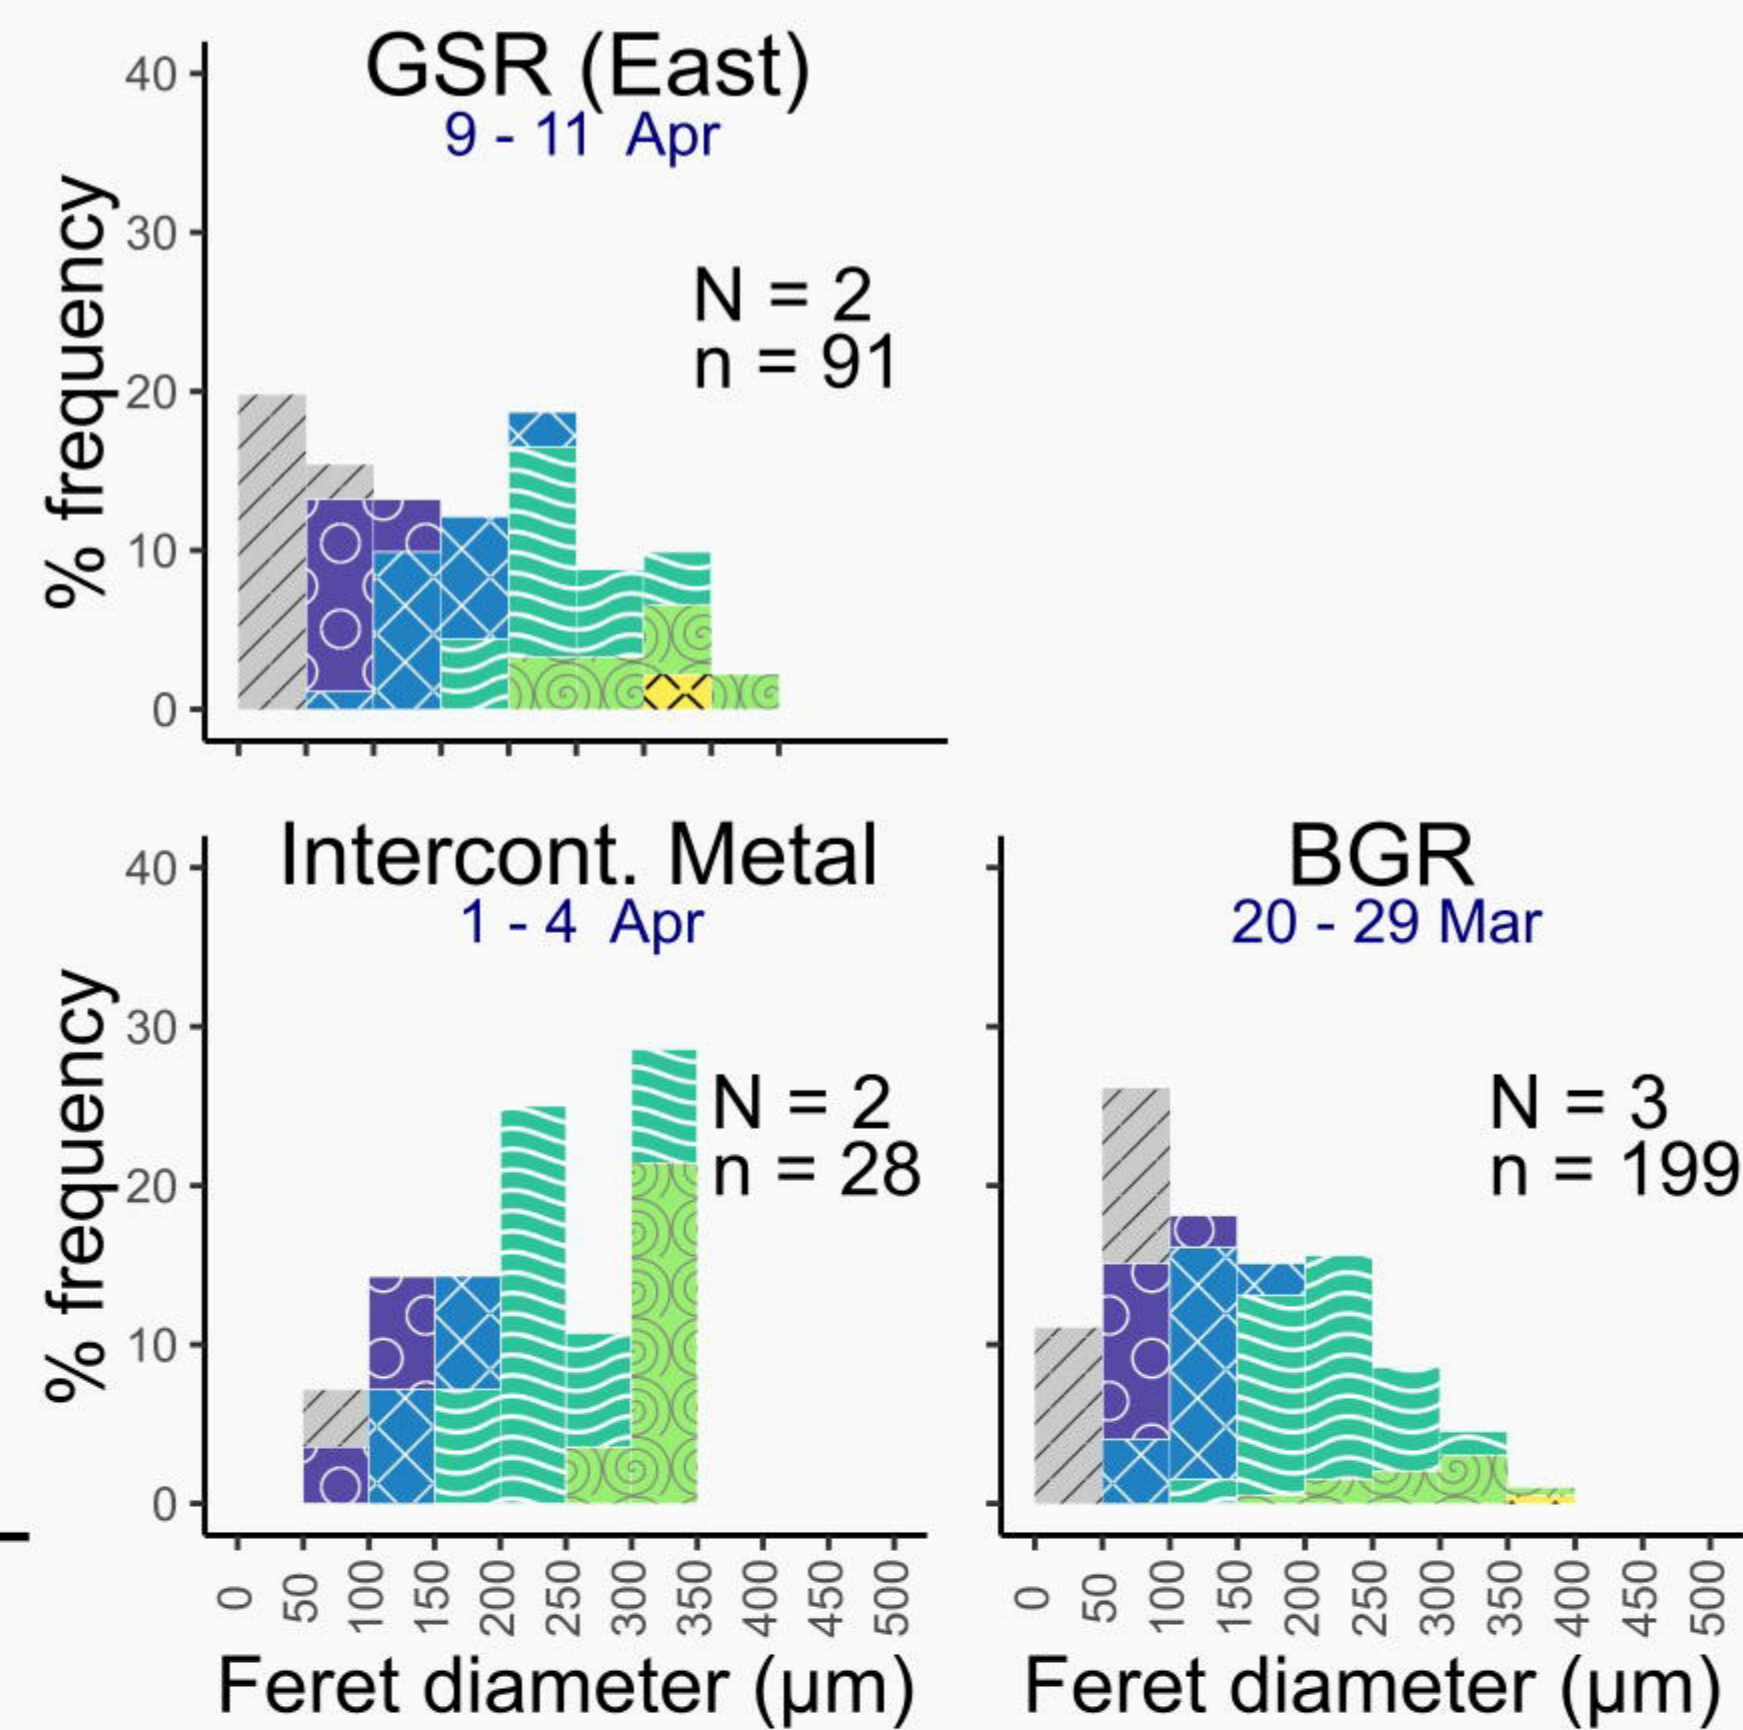

e) *O. cosmica* (by year)

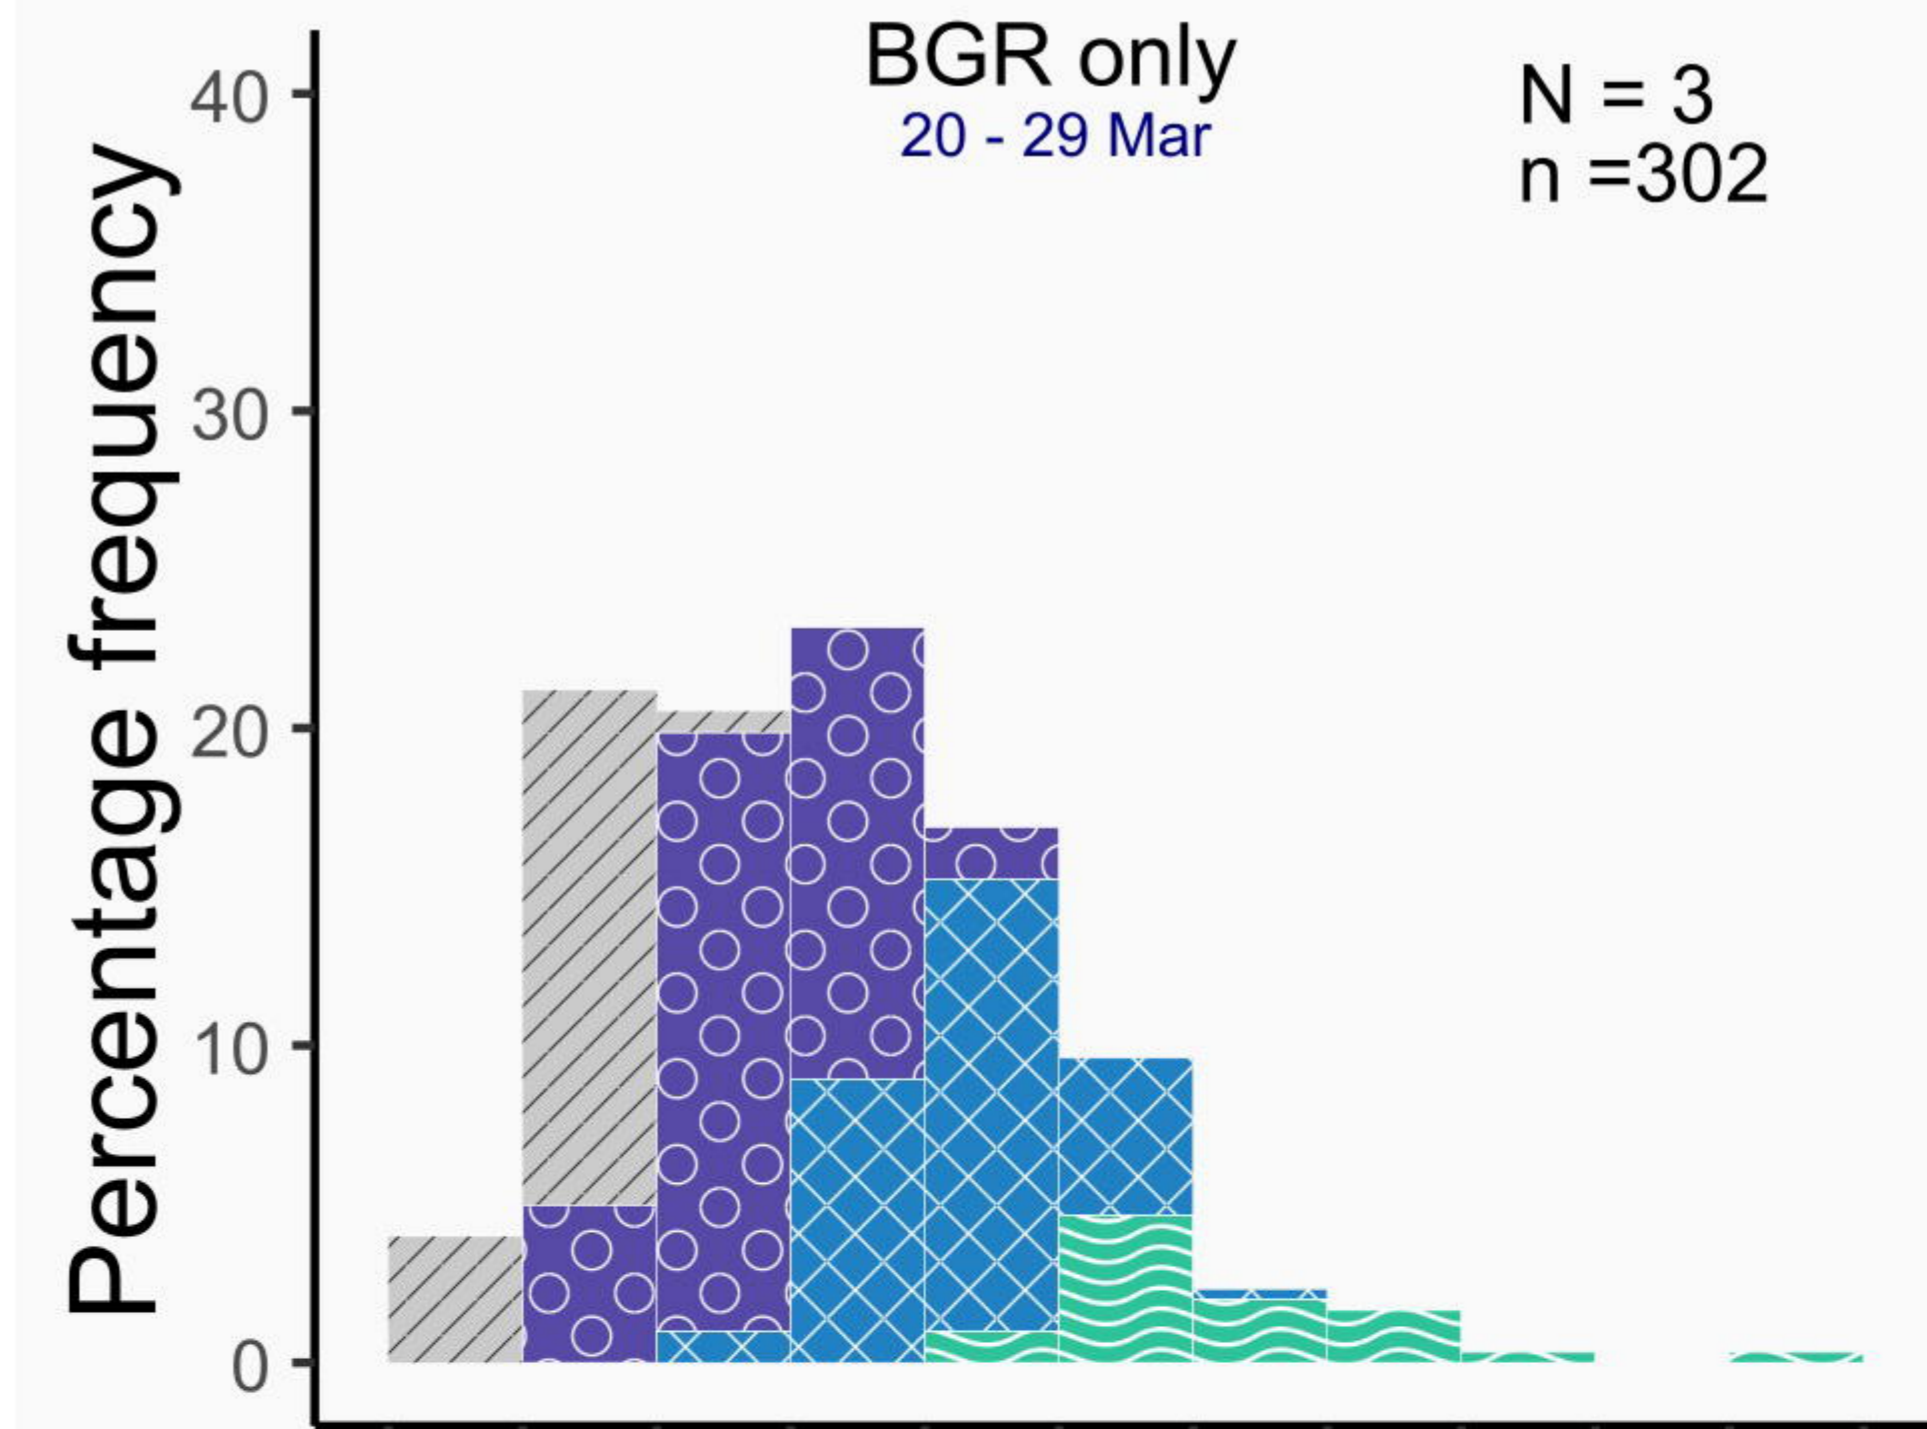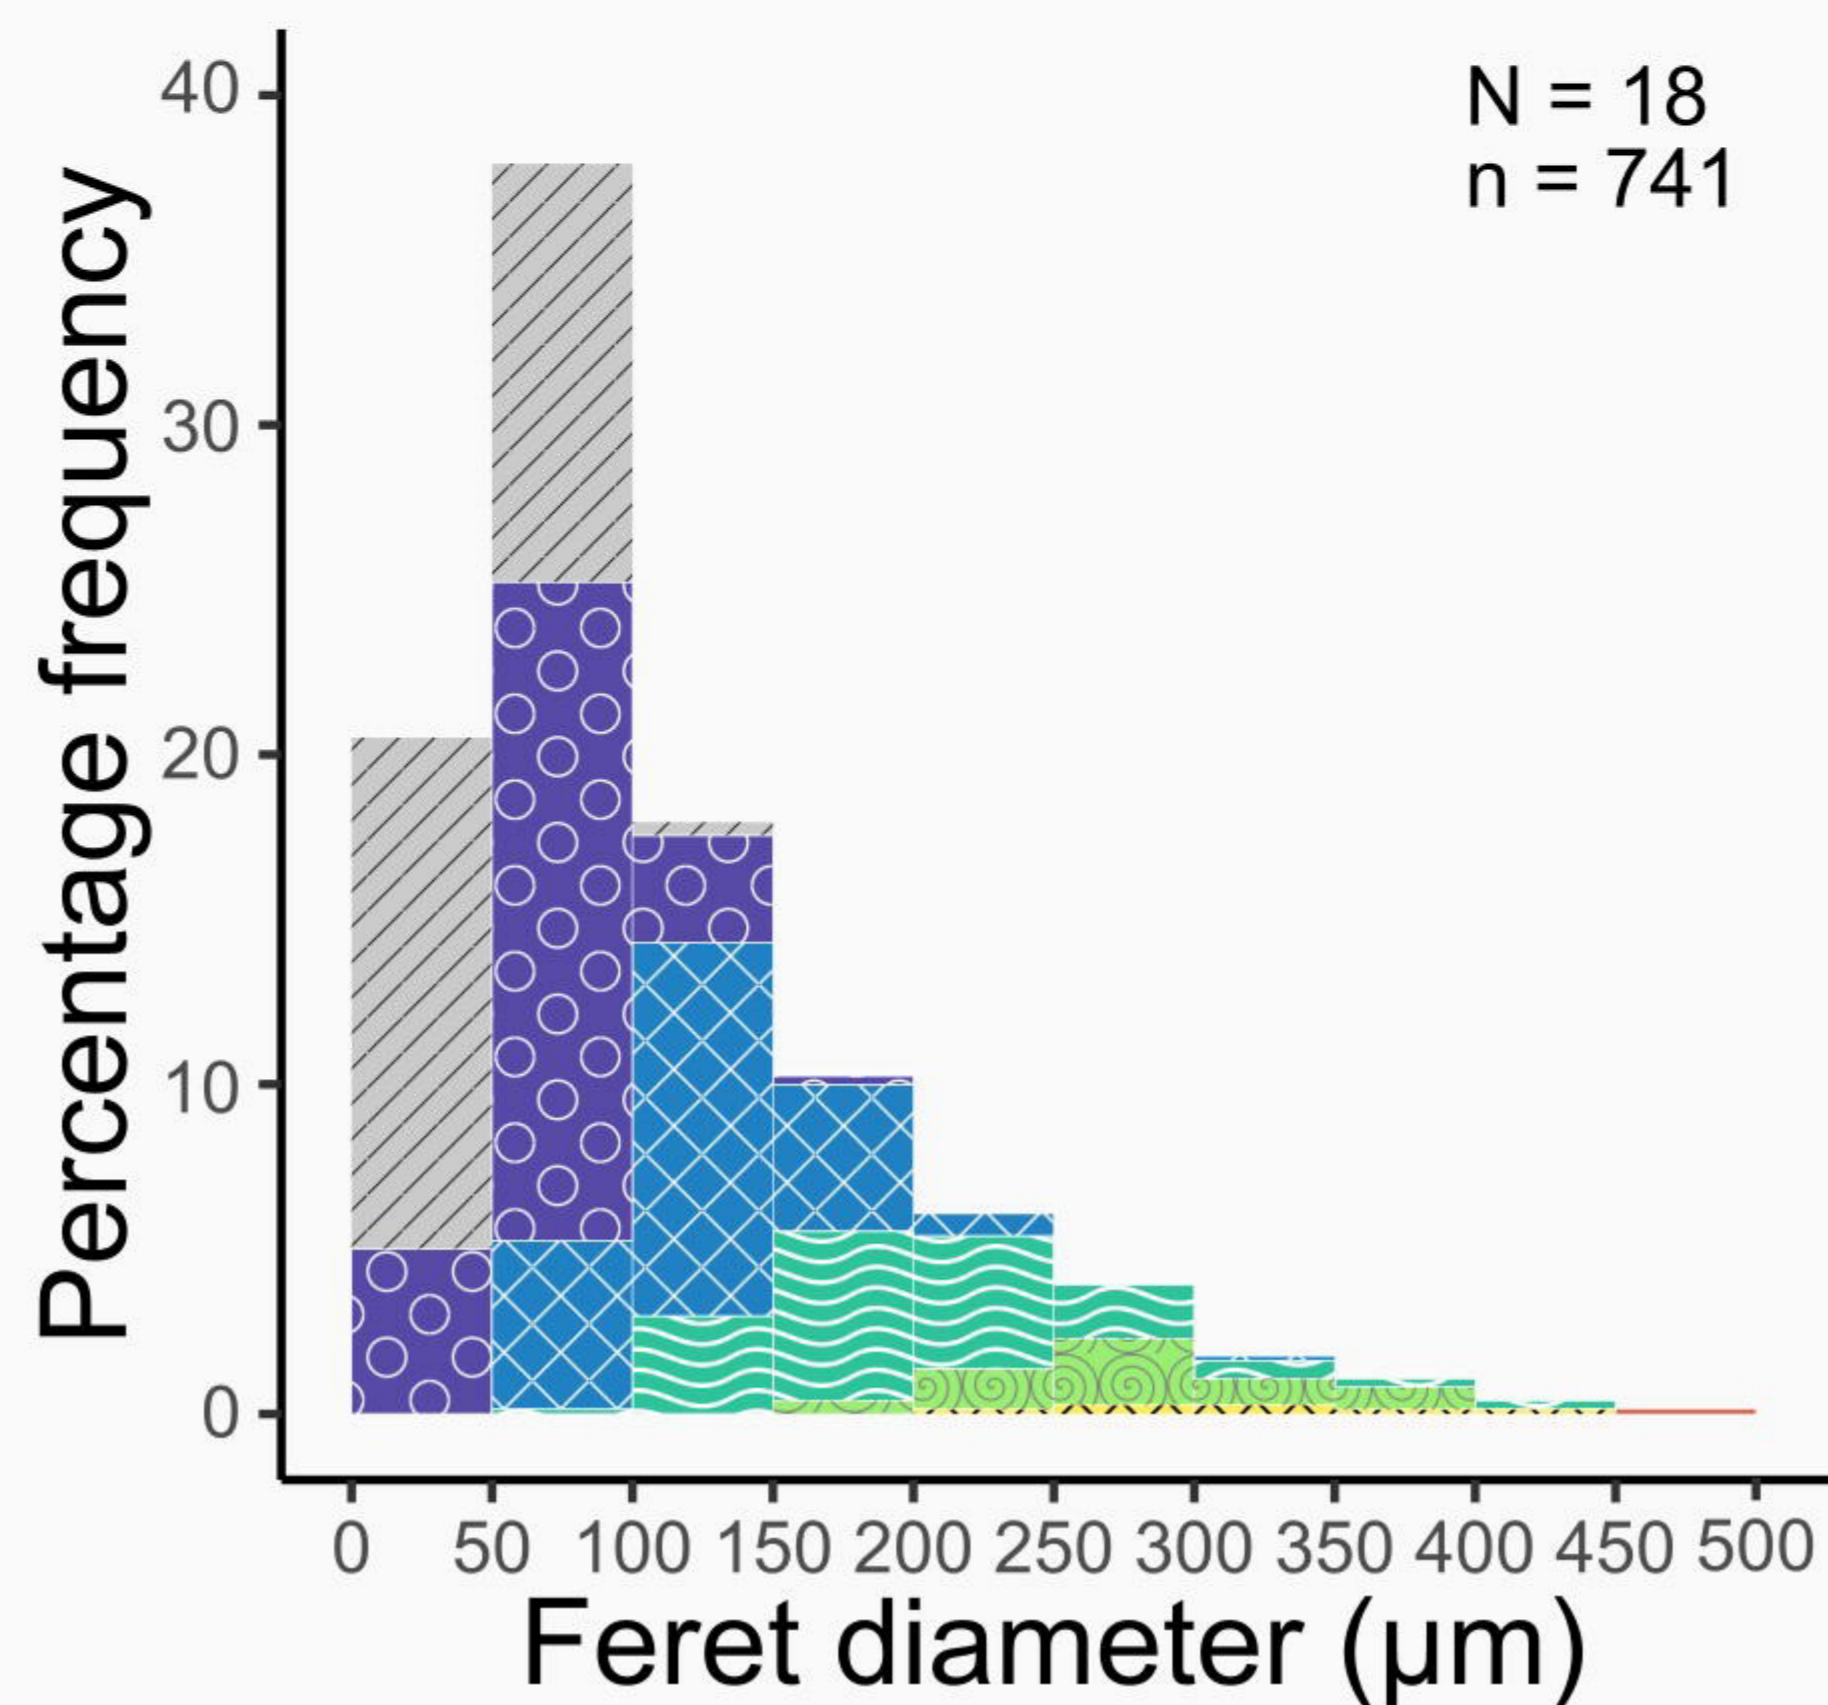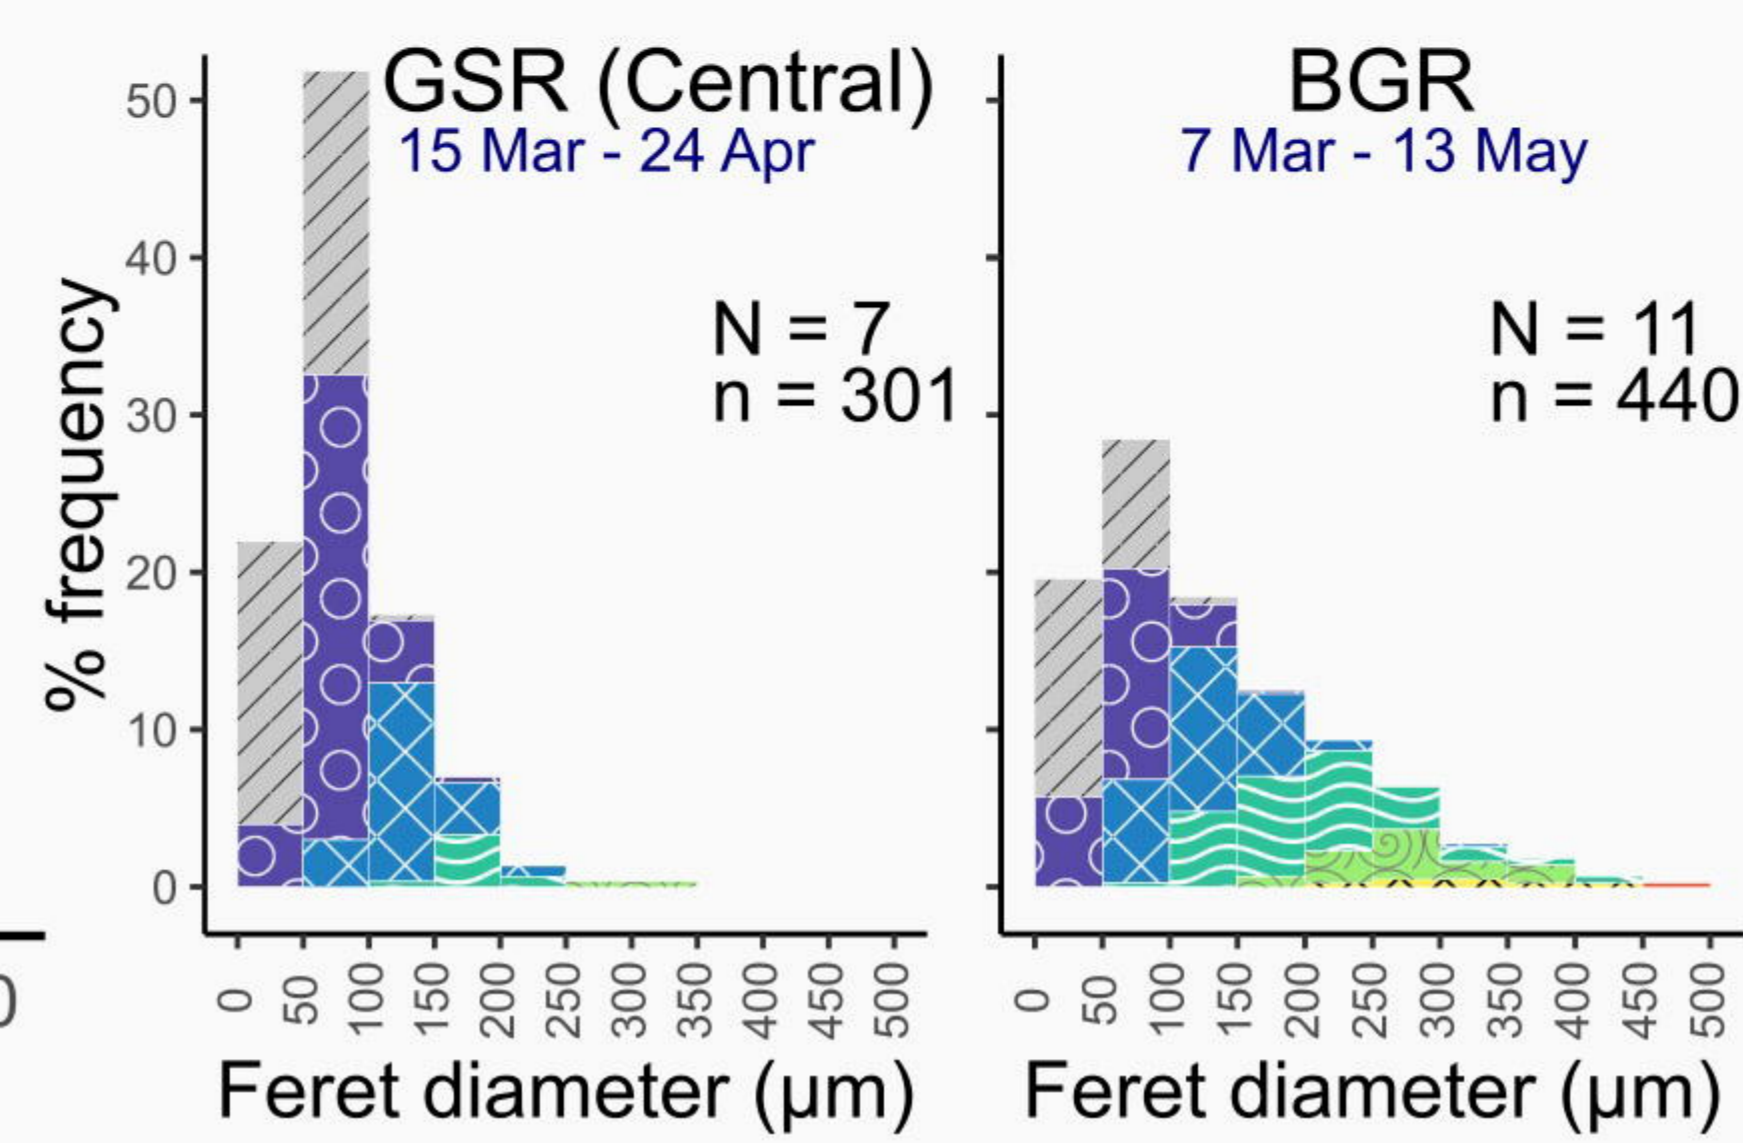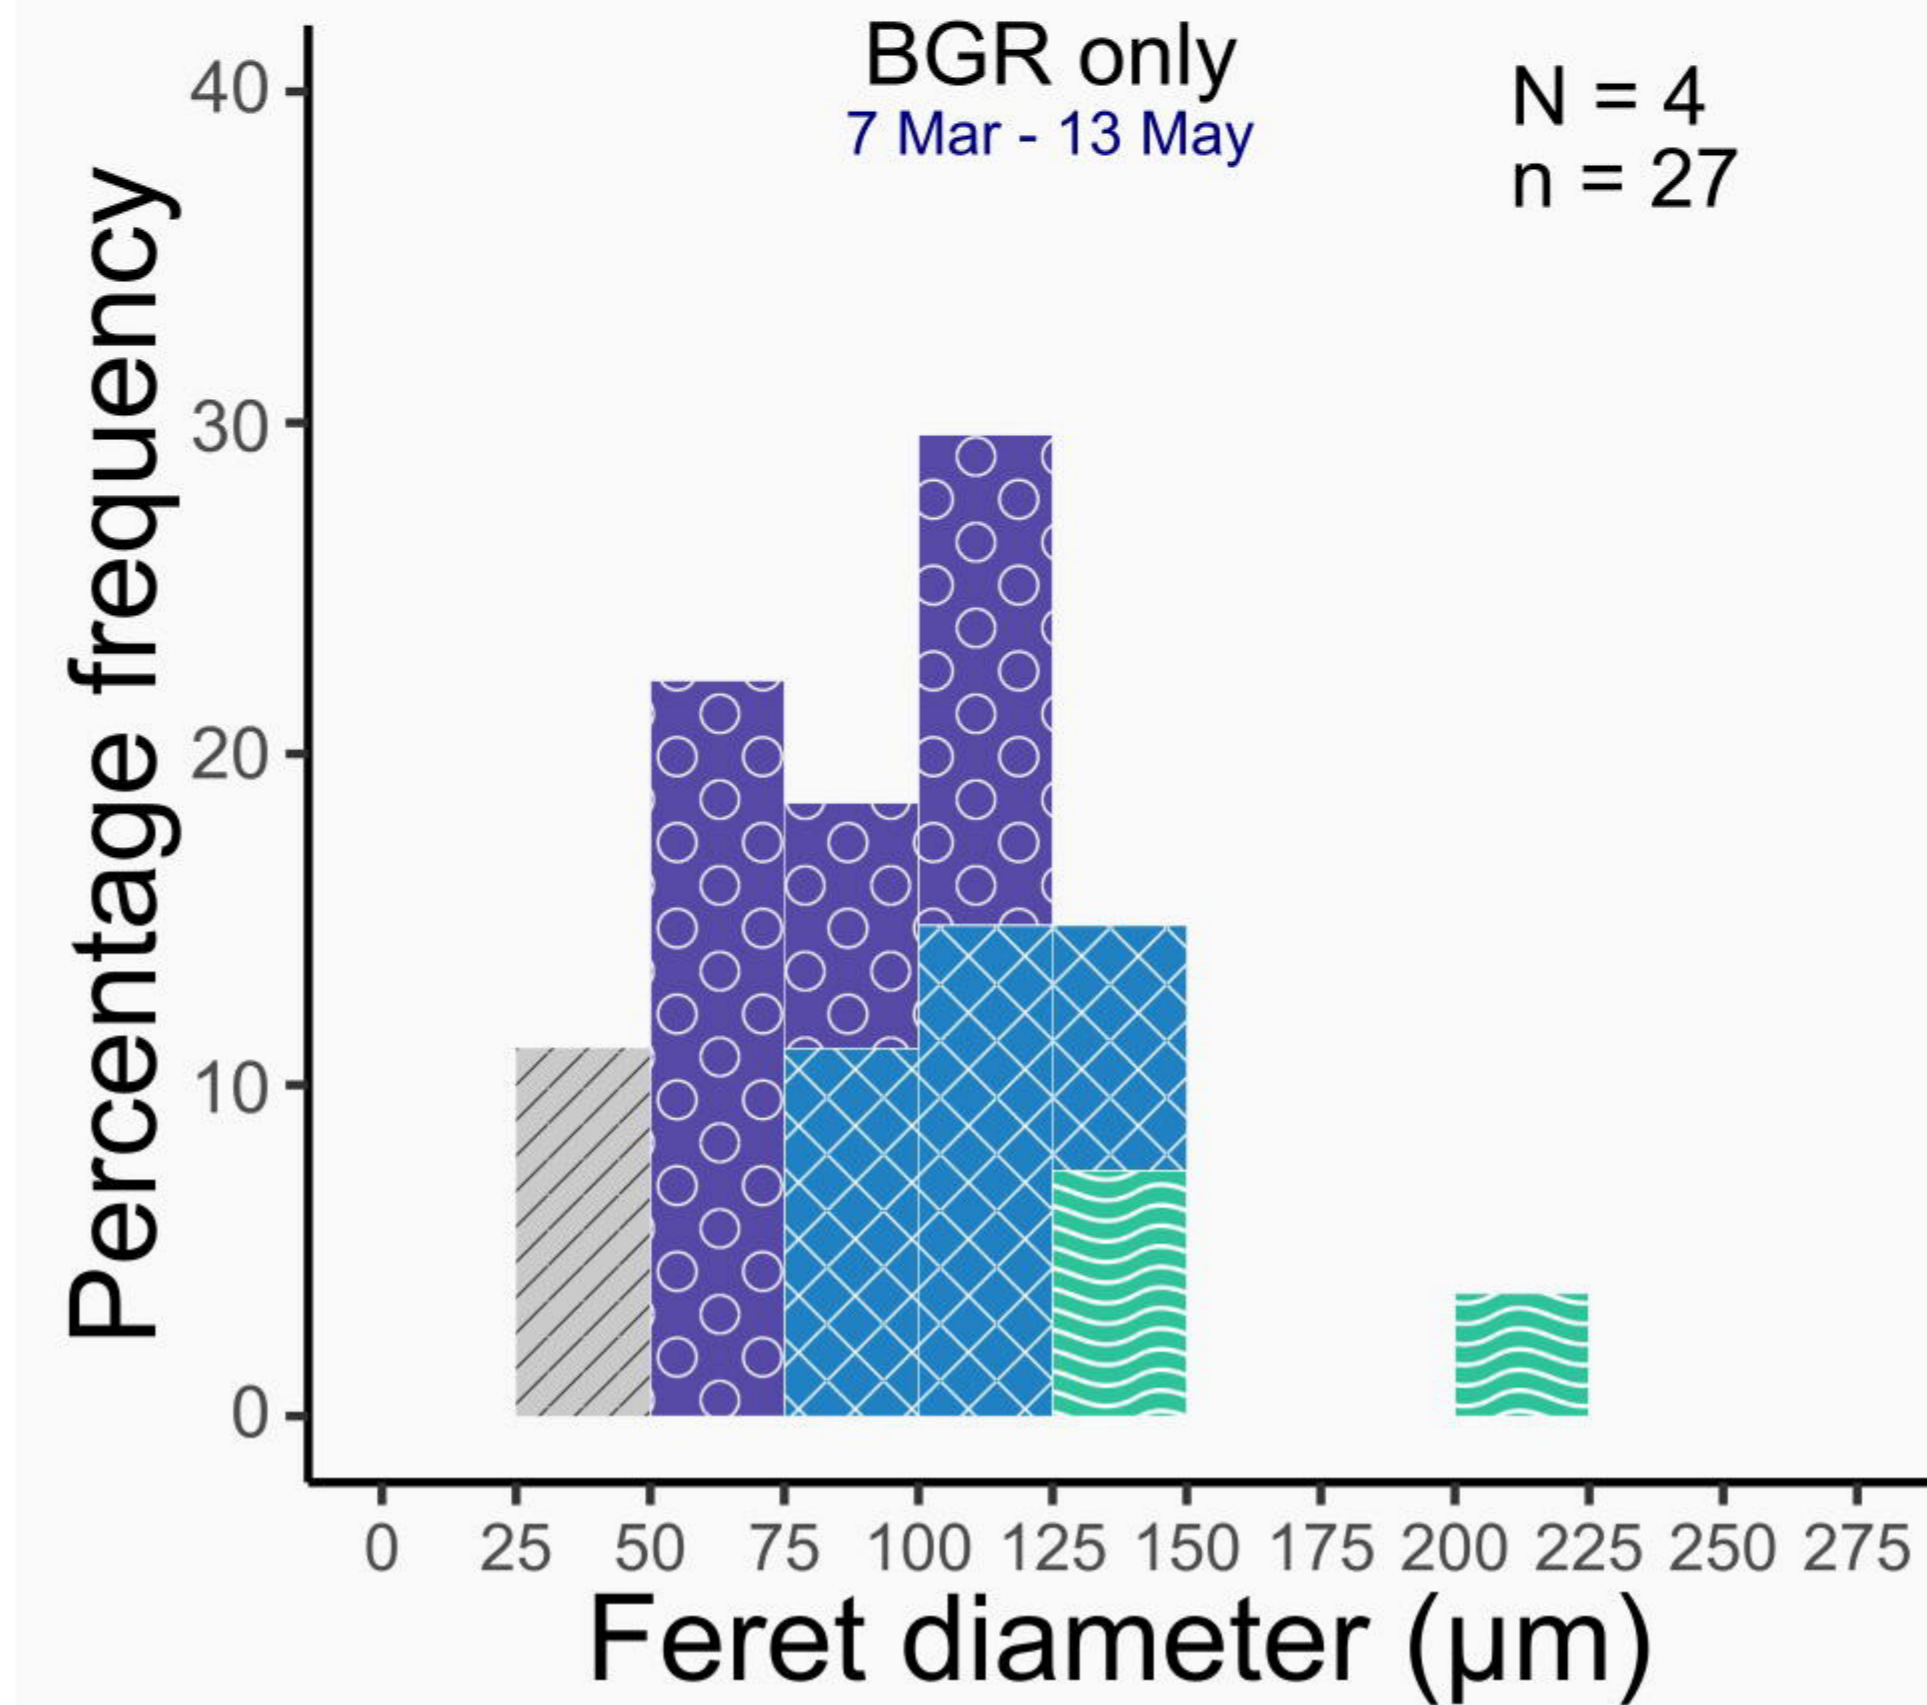

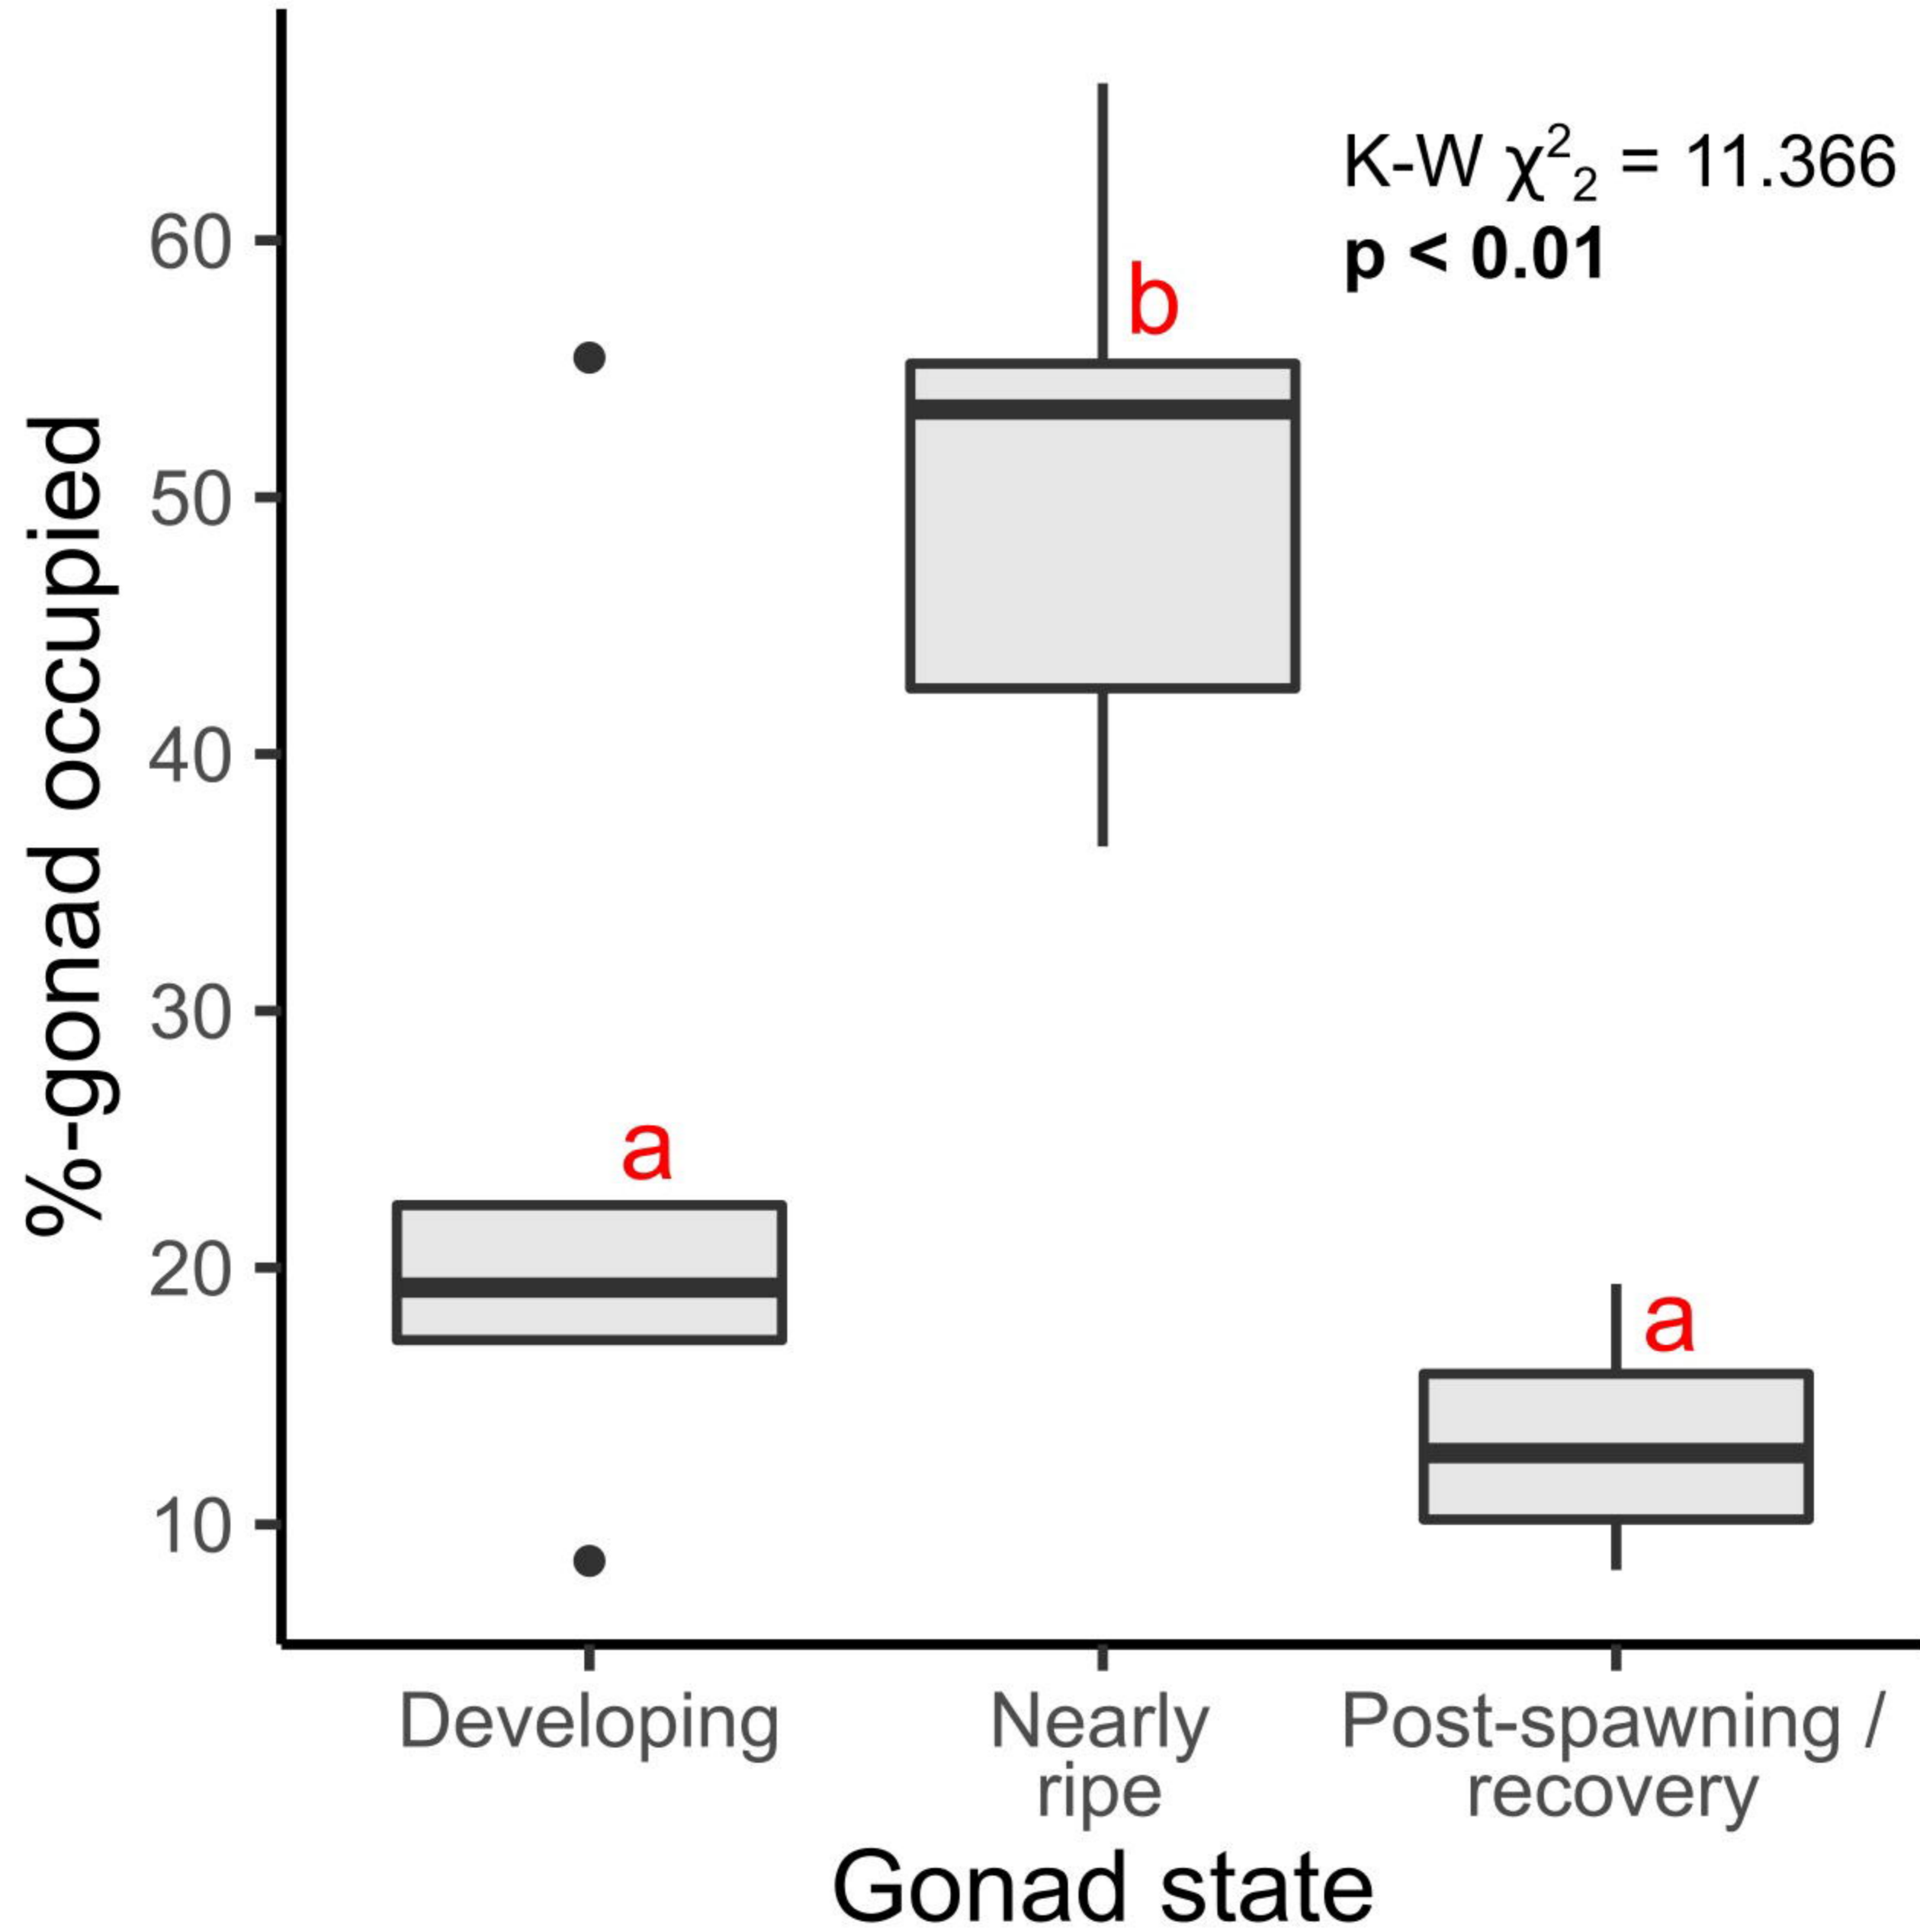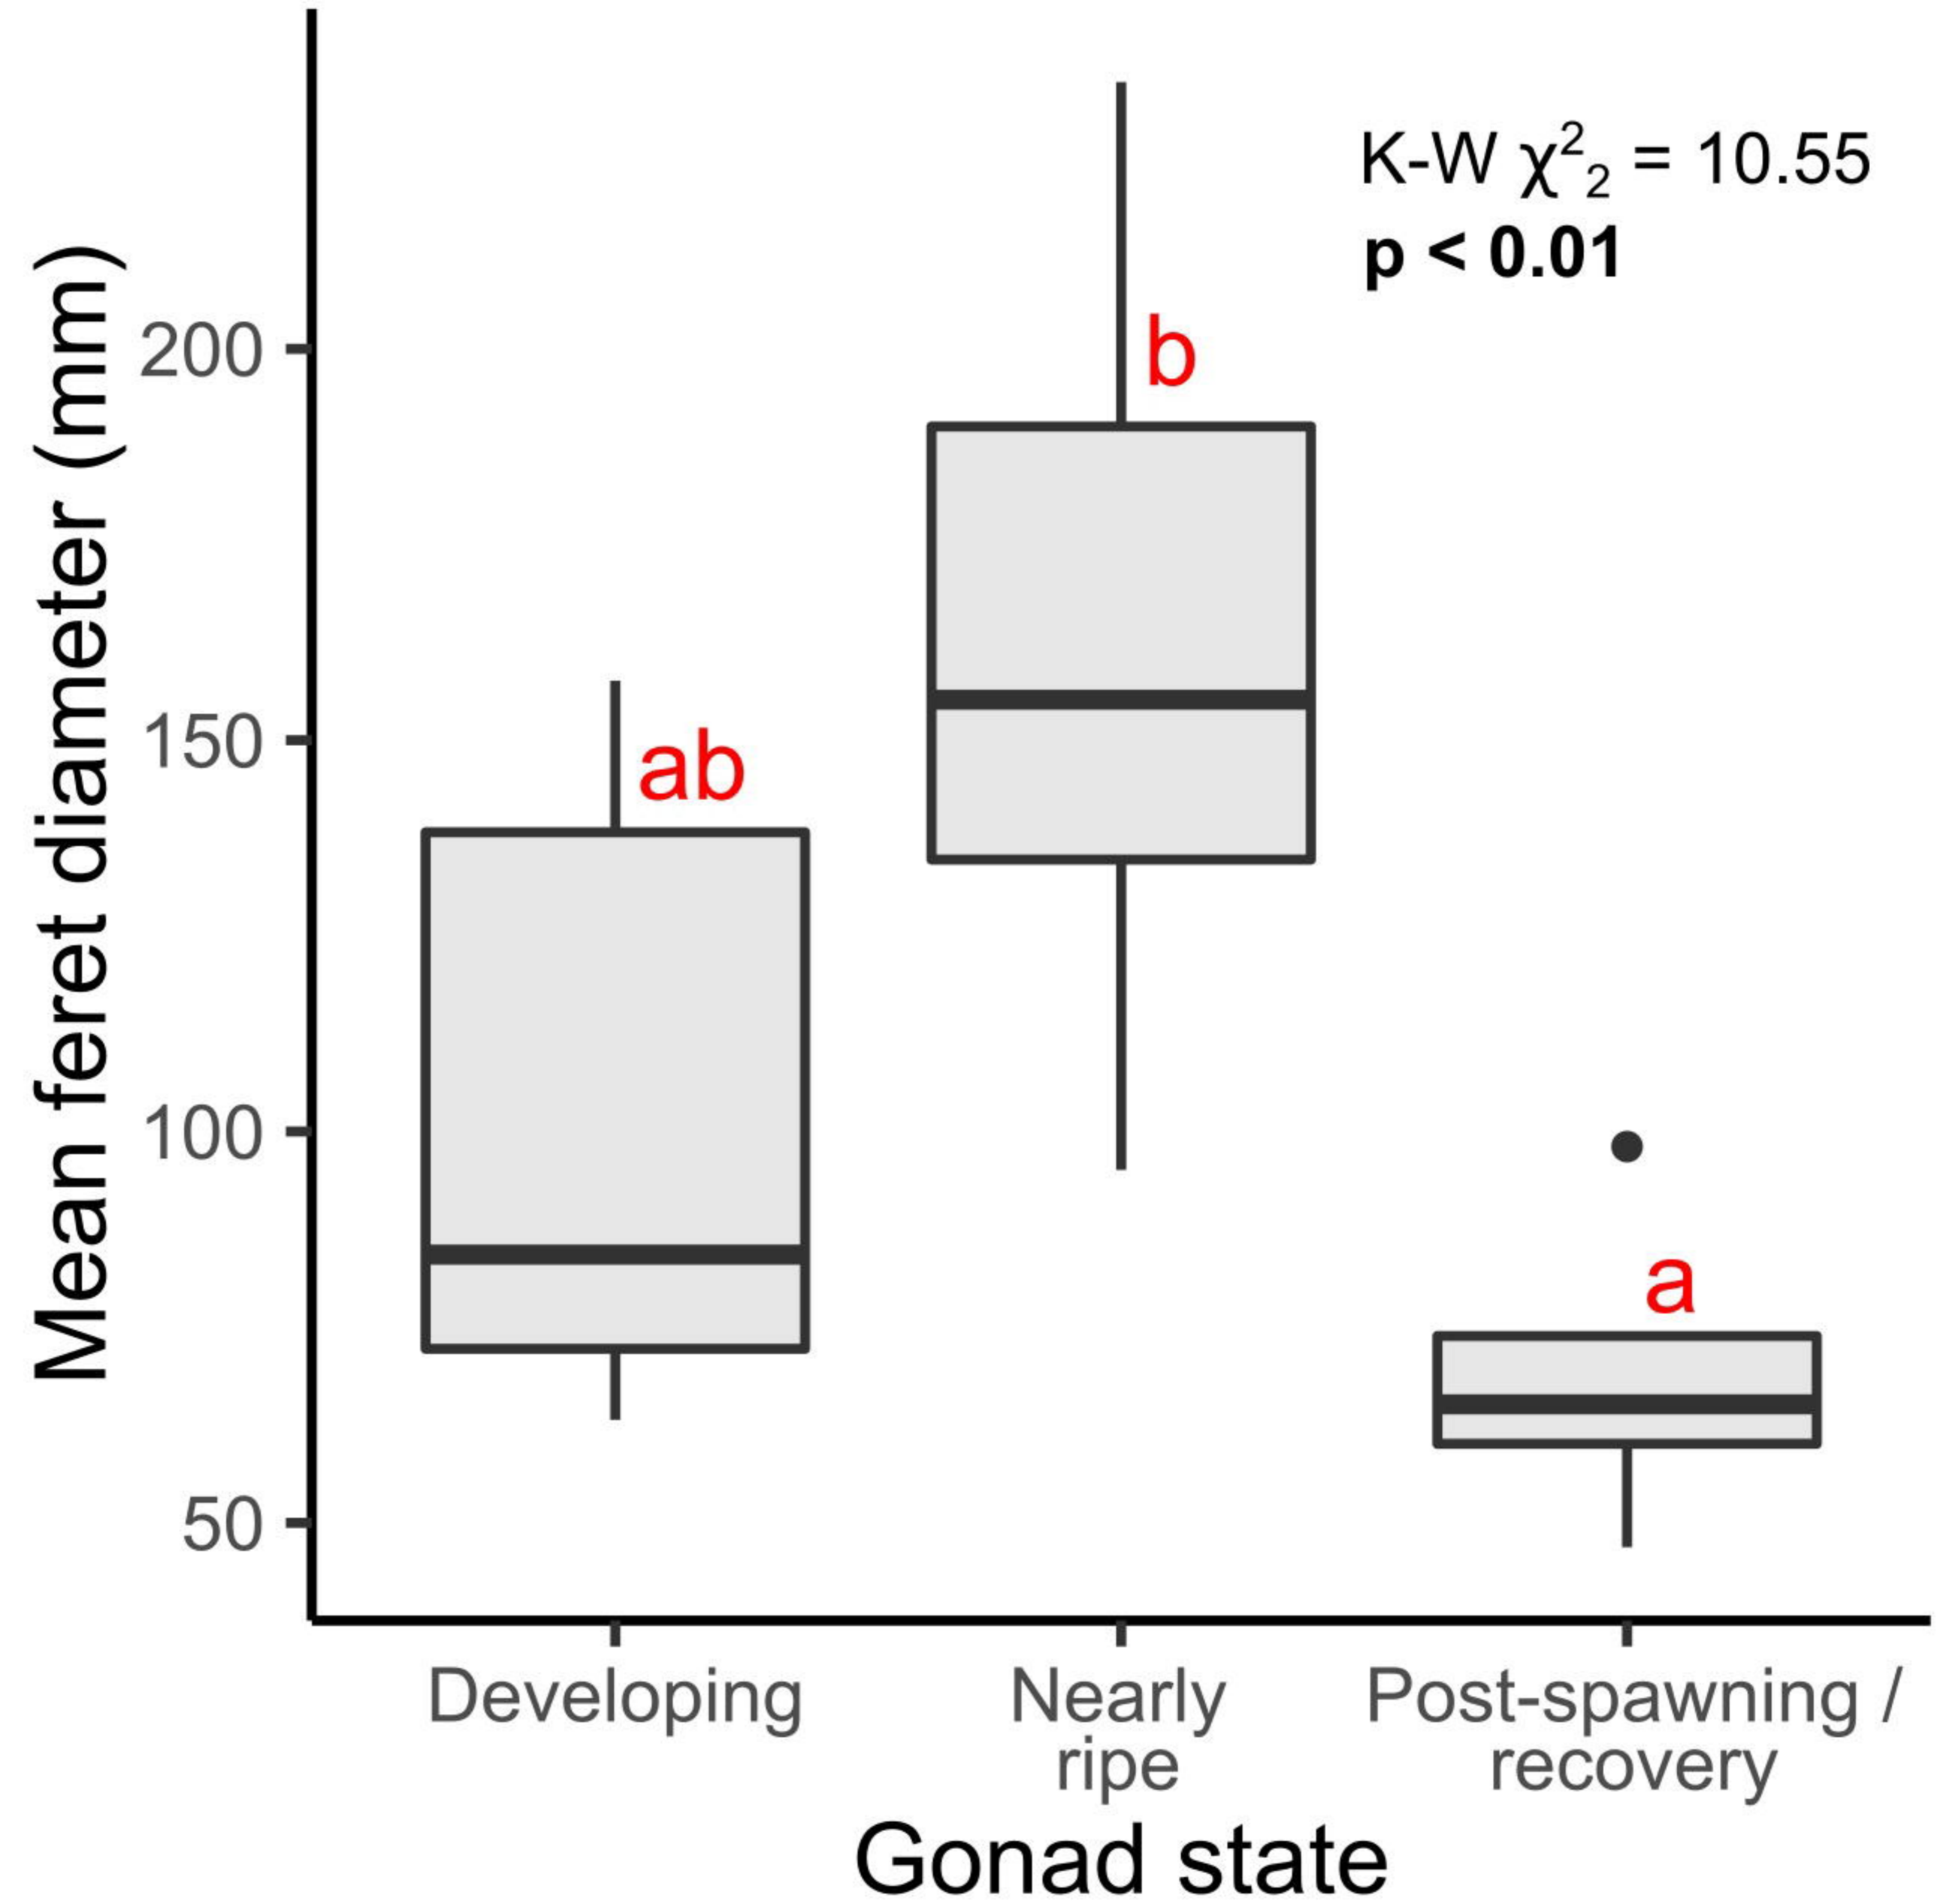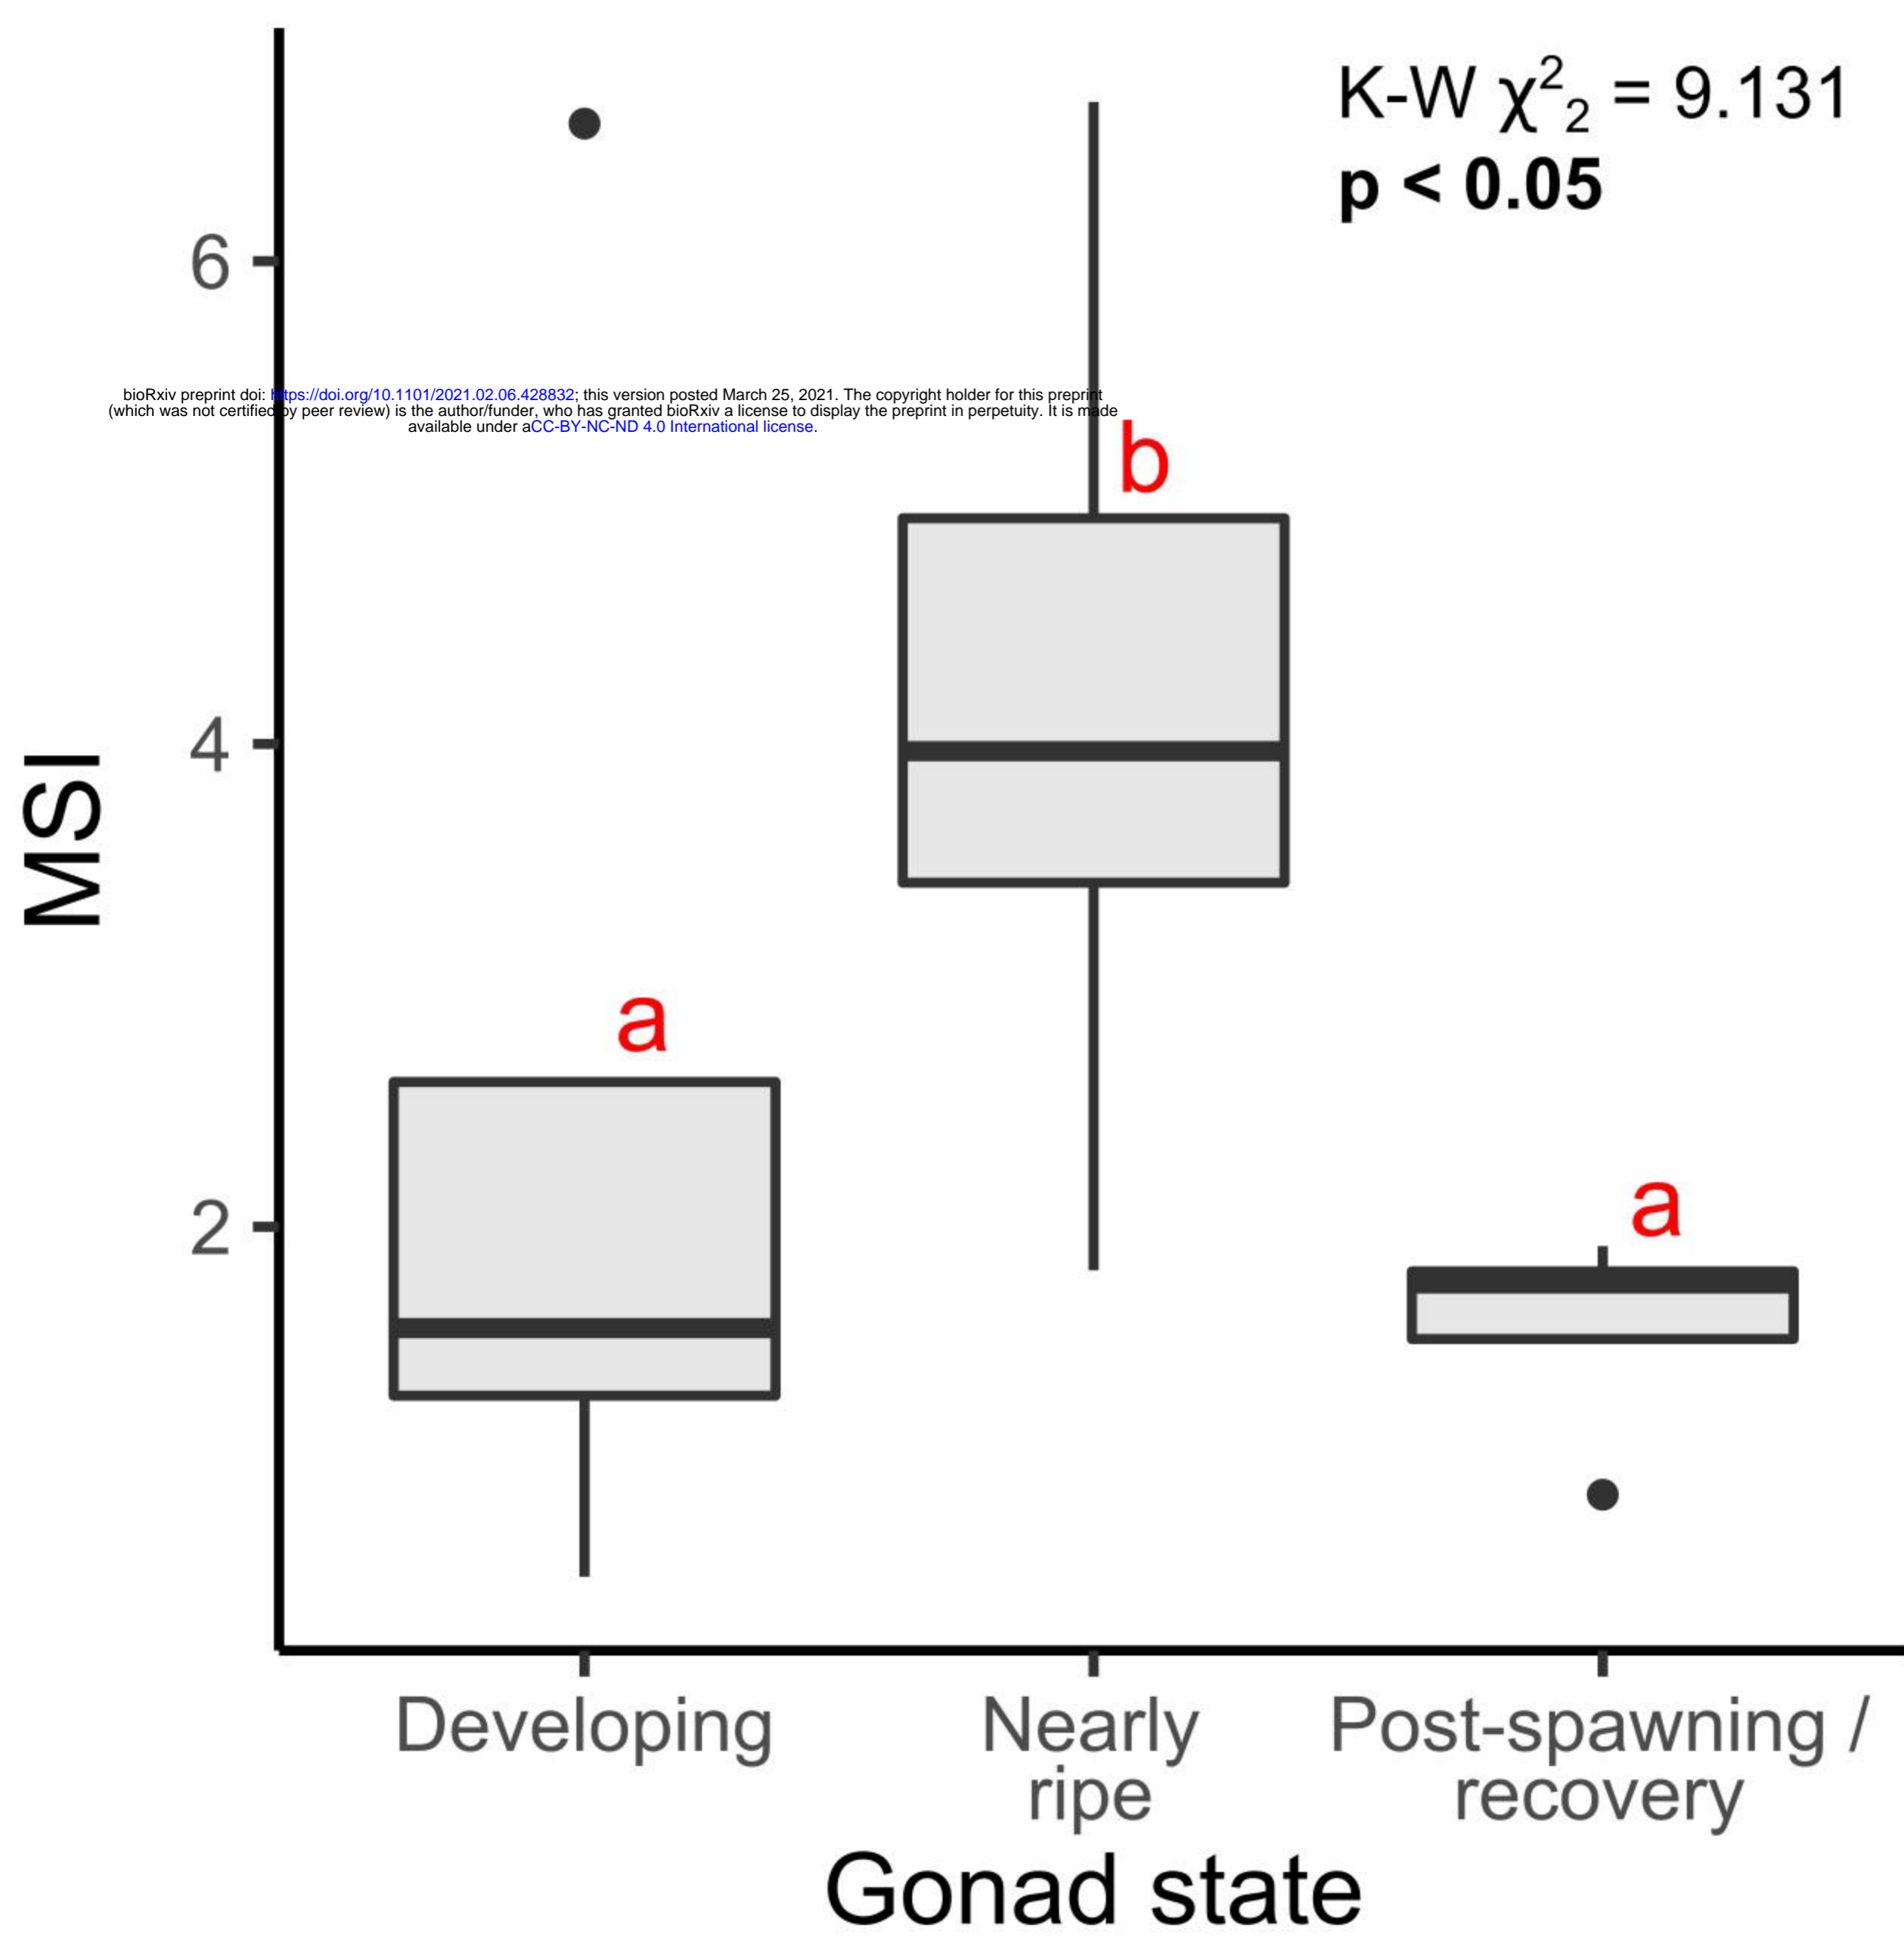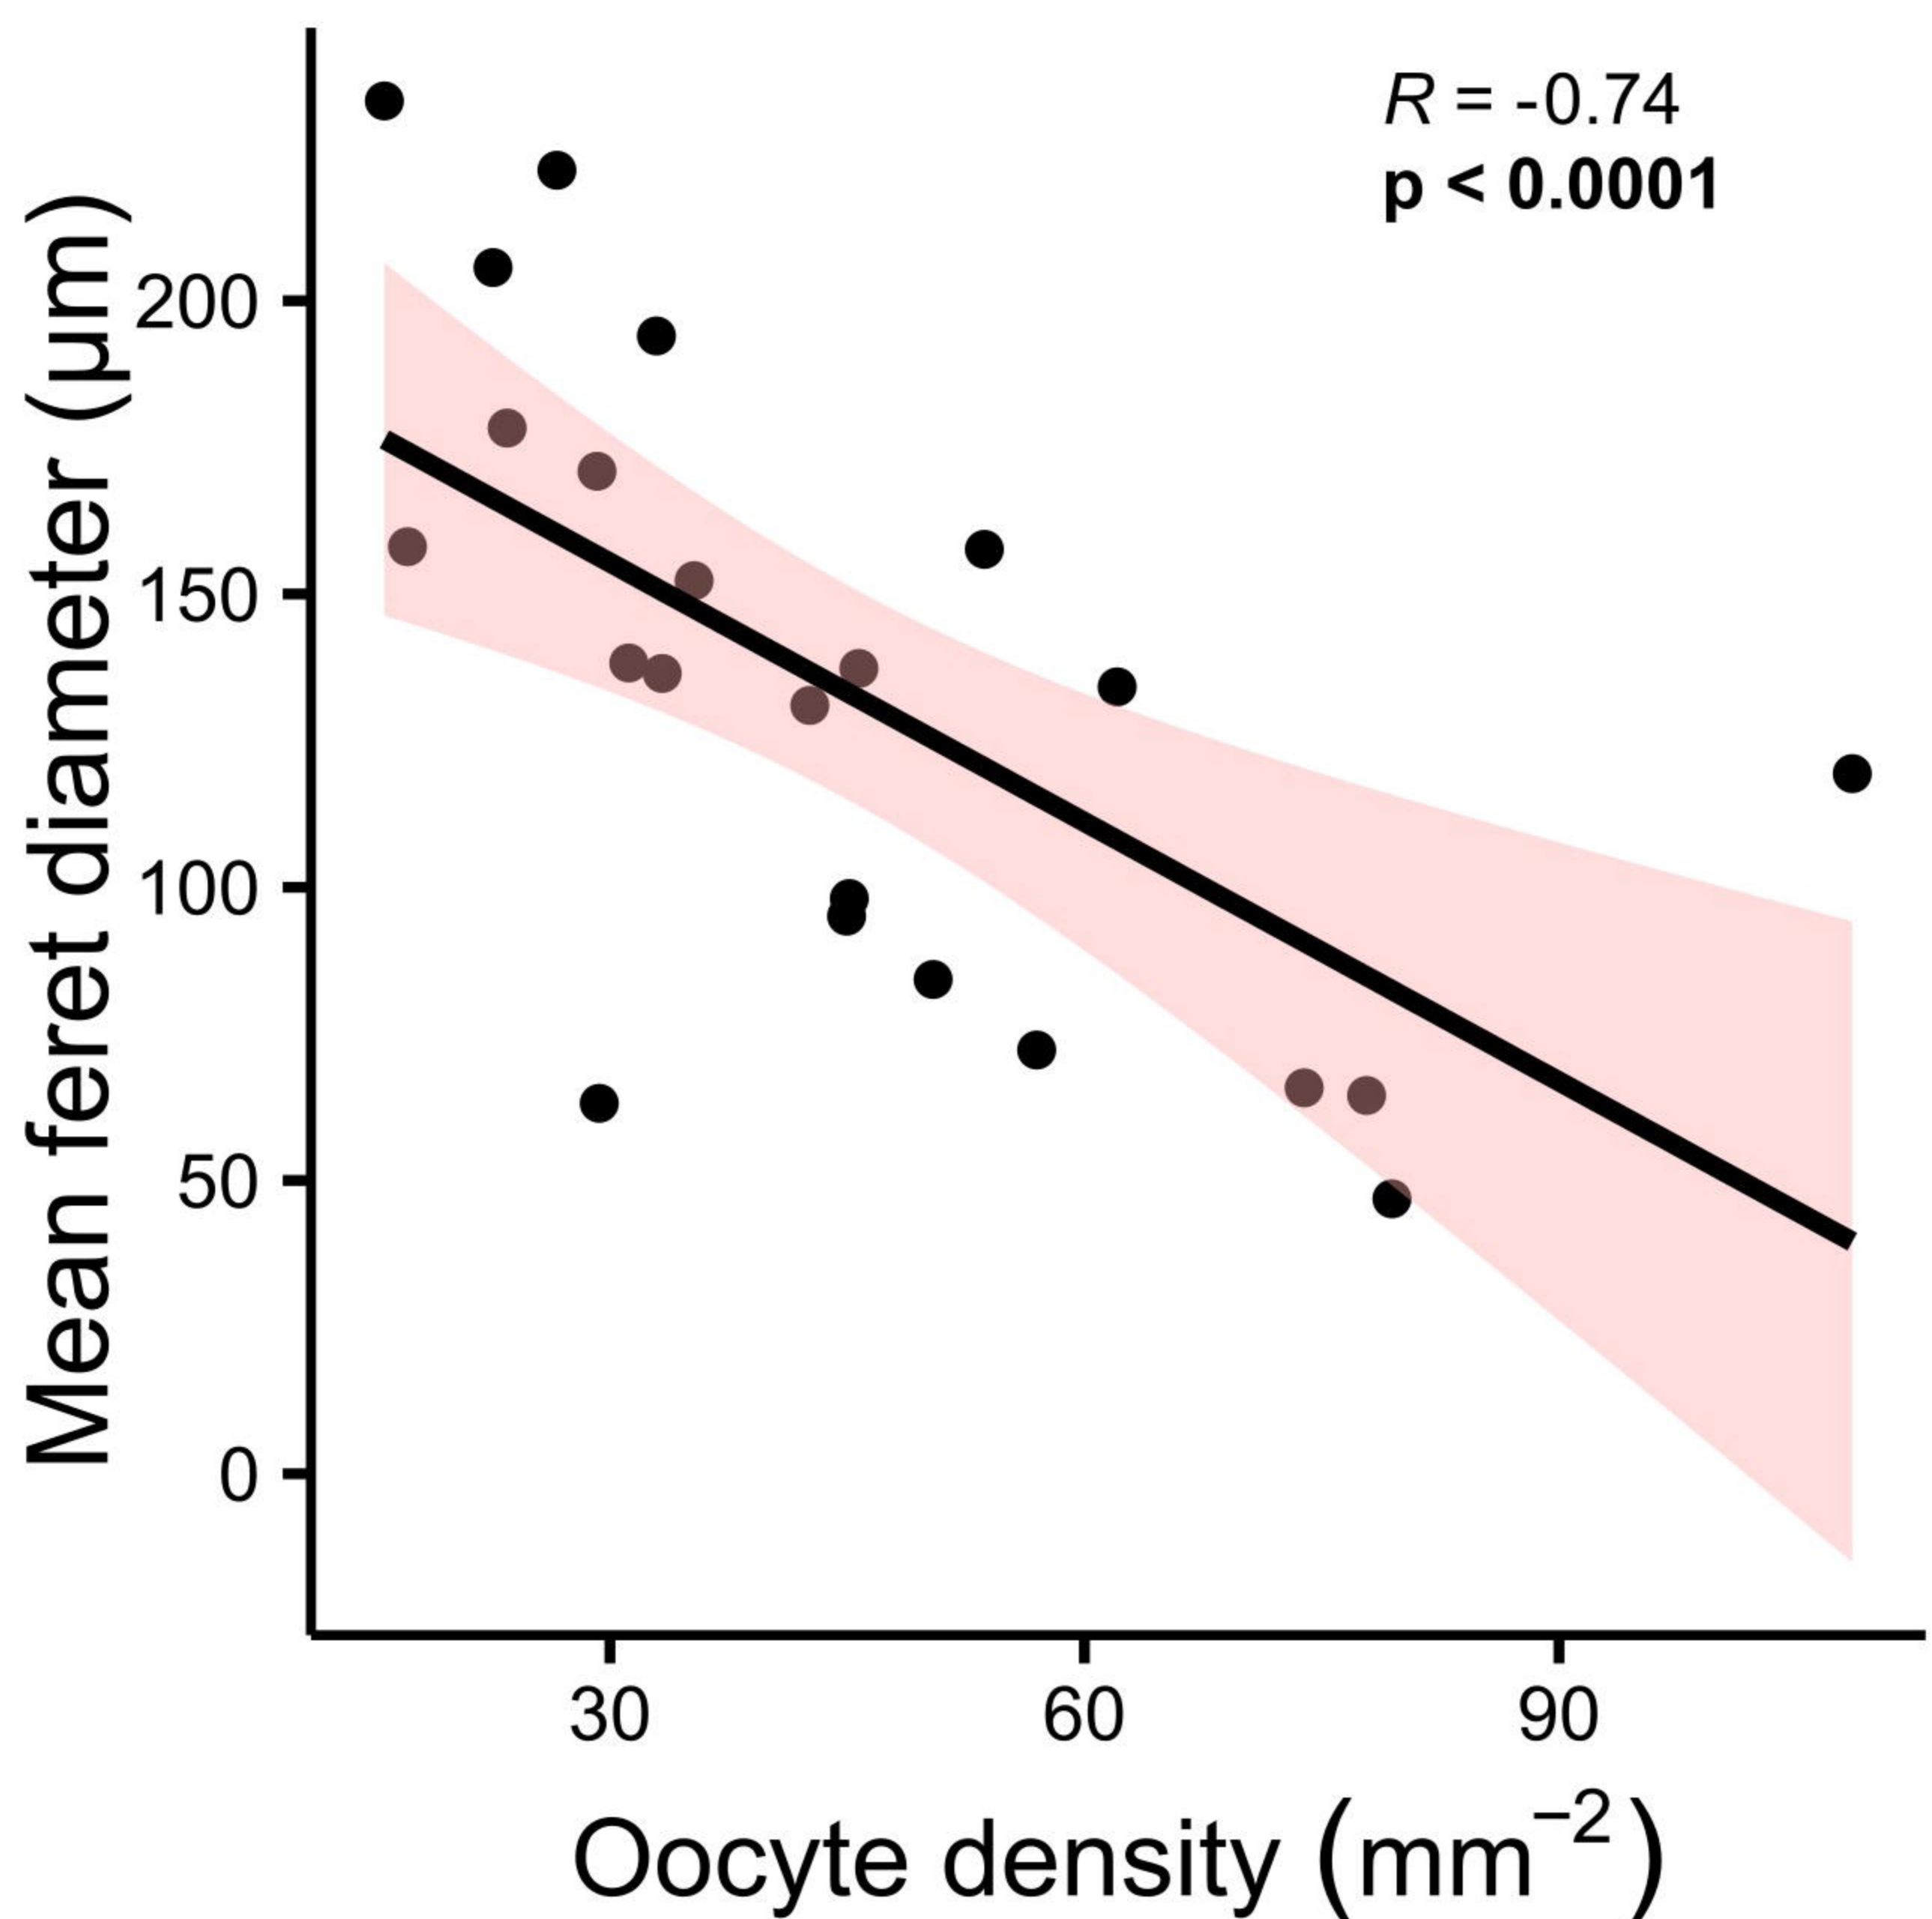

a) *Ophiosphalma glabrum*

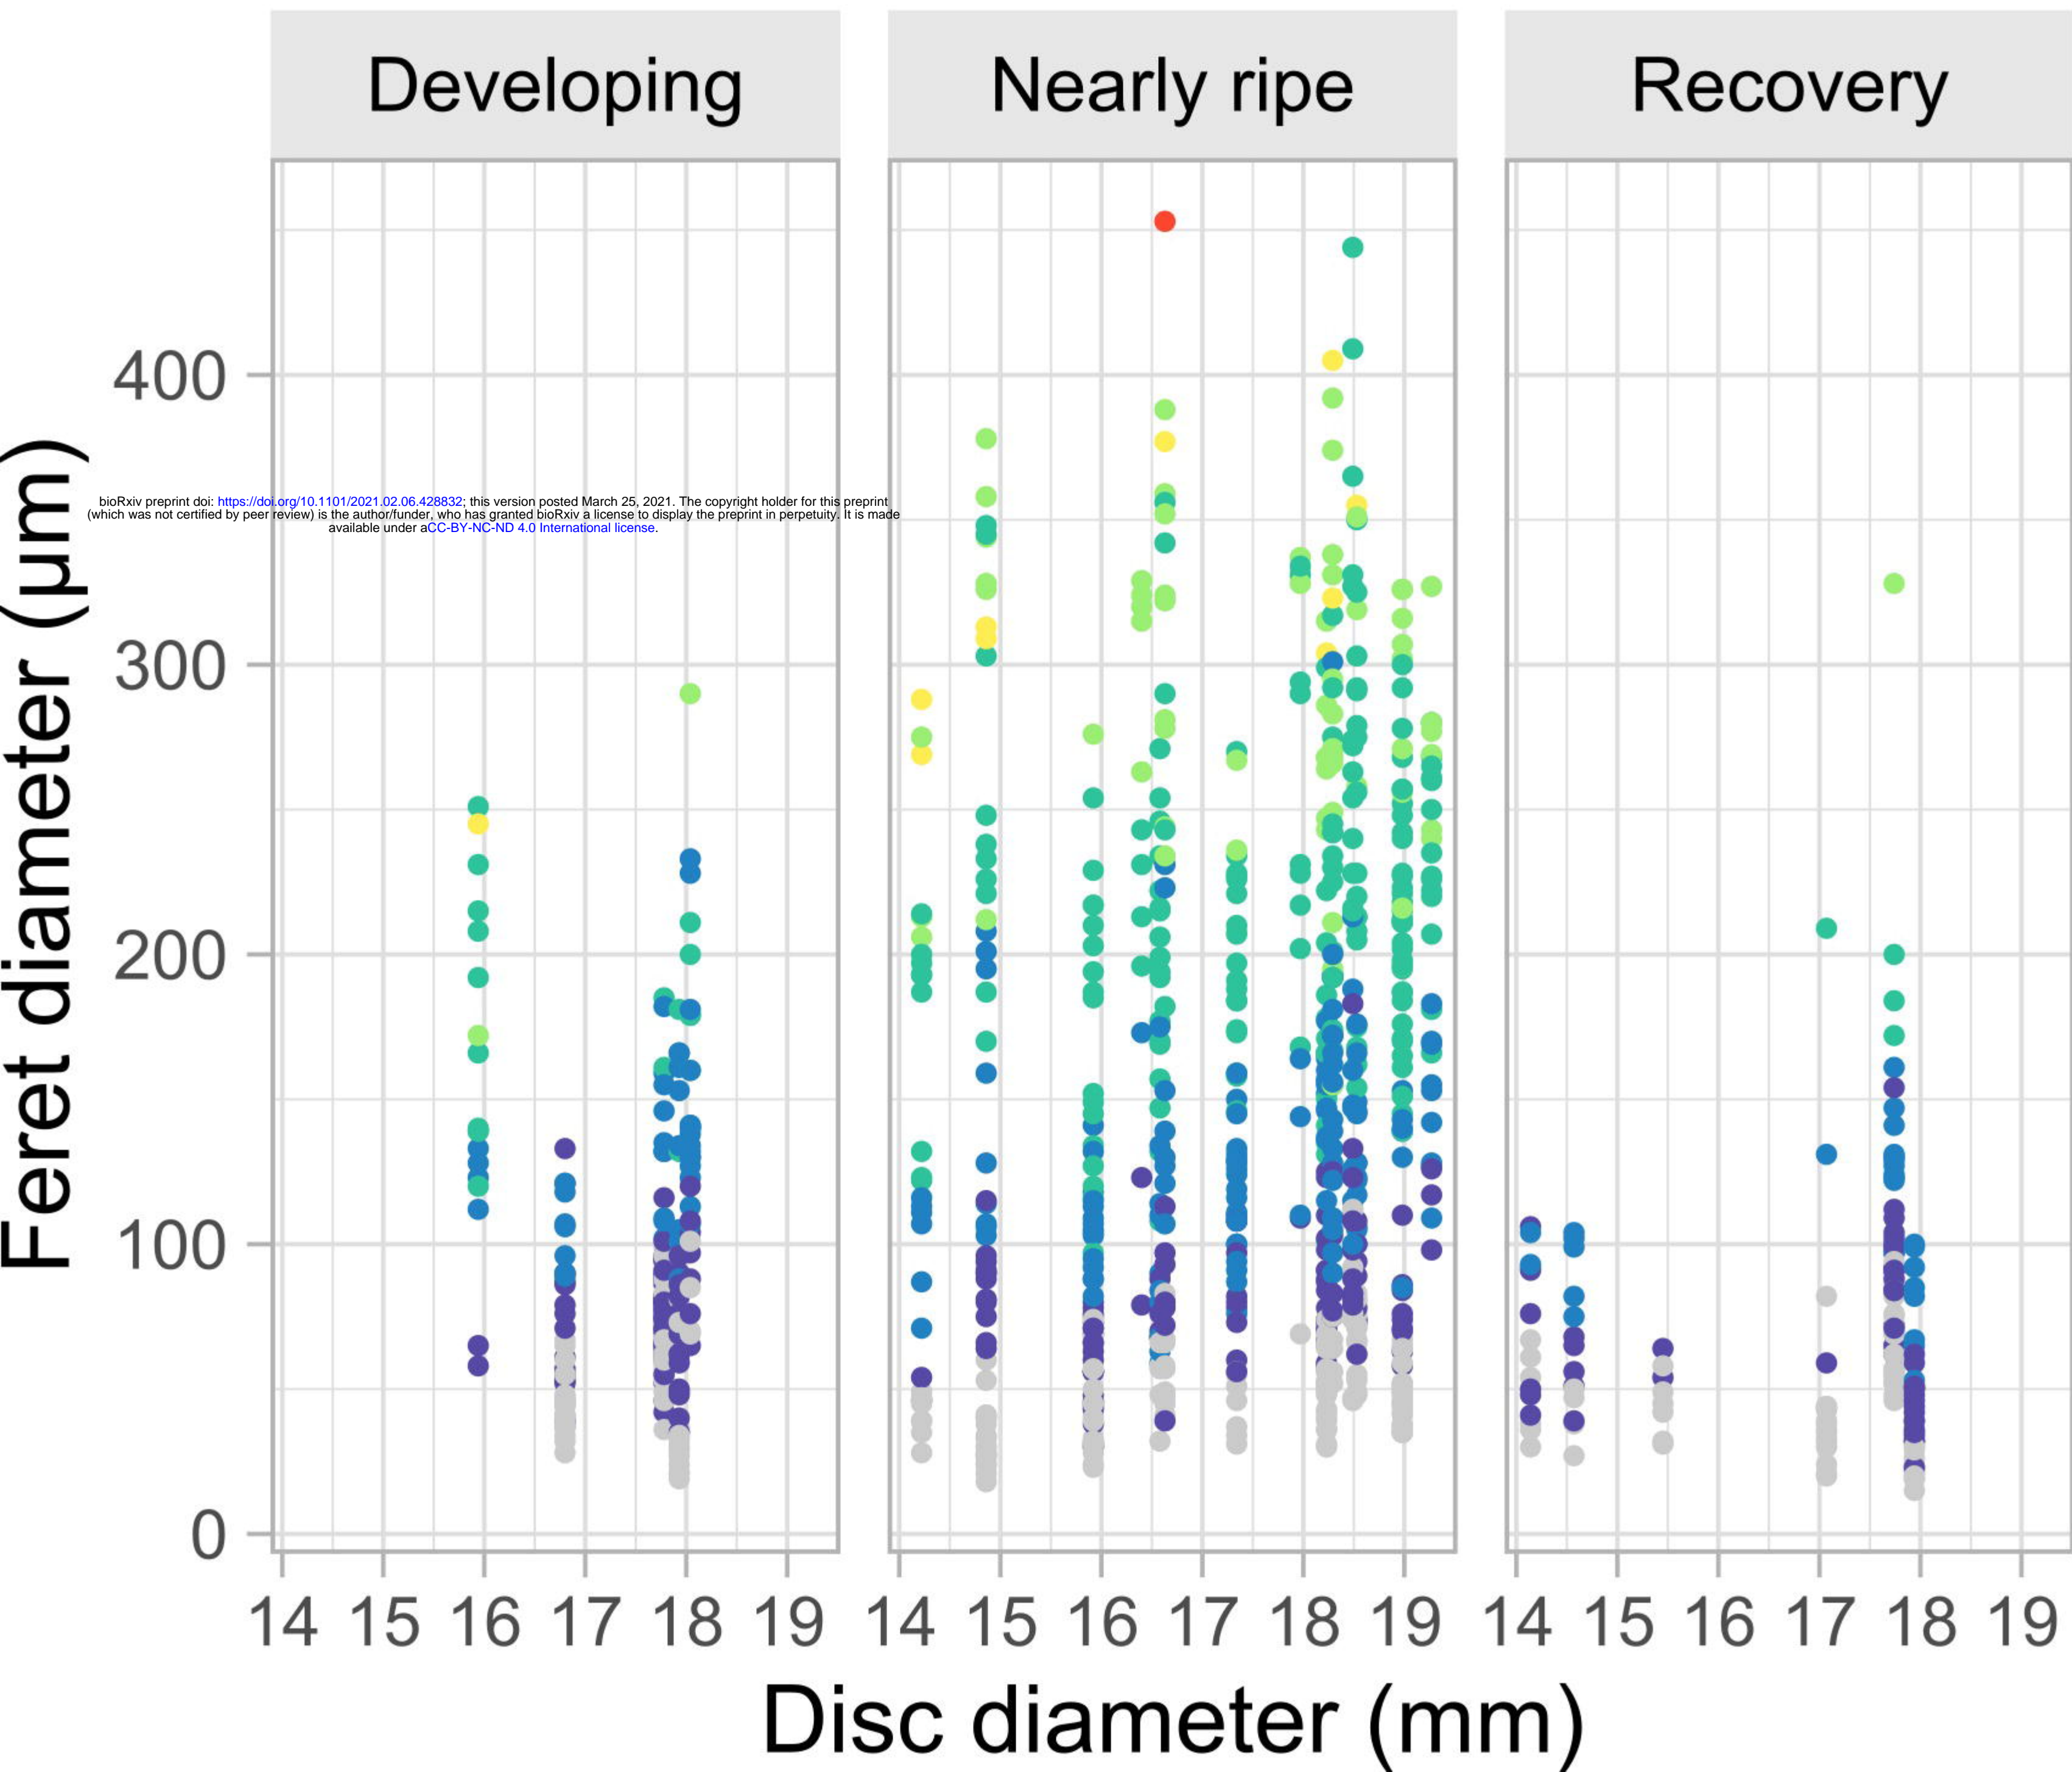

b) *Ophiacantha cosmica*

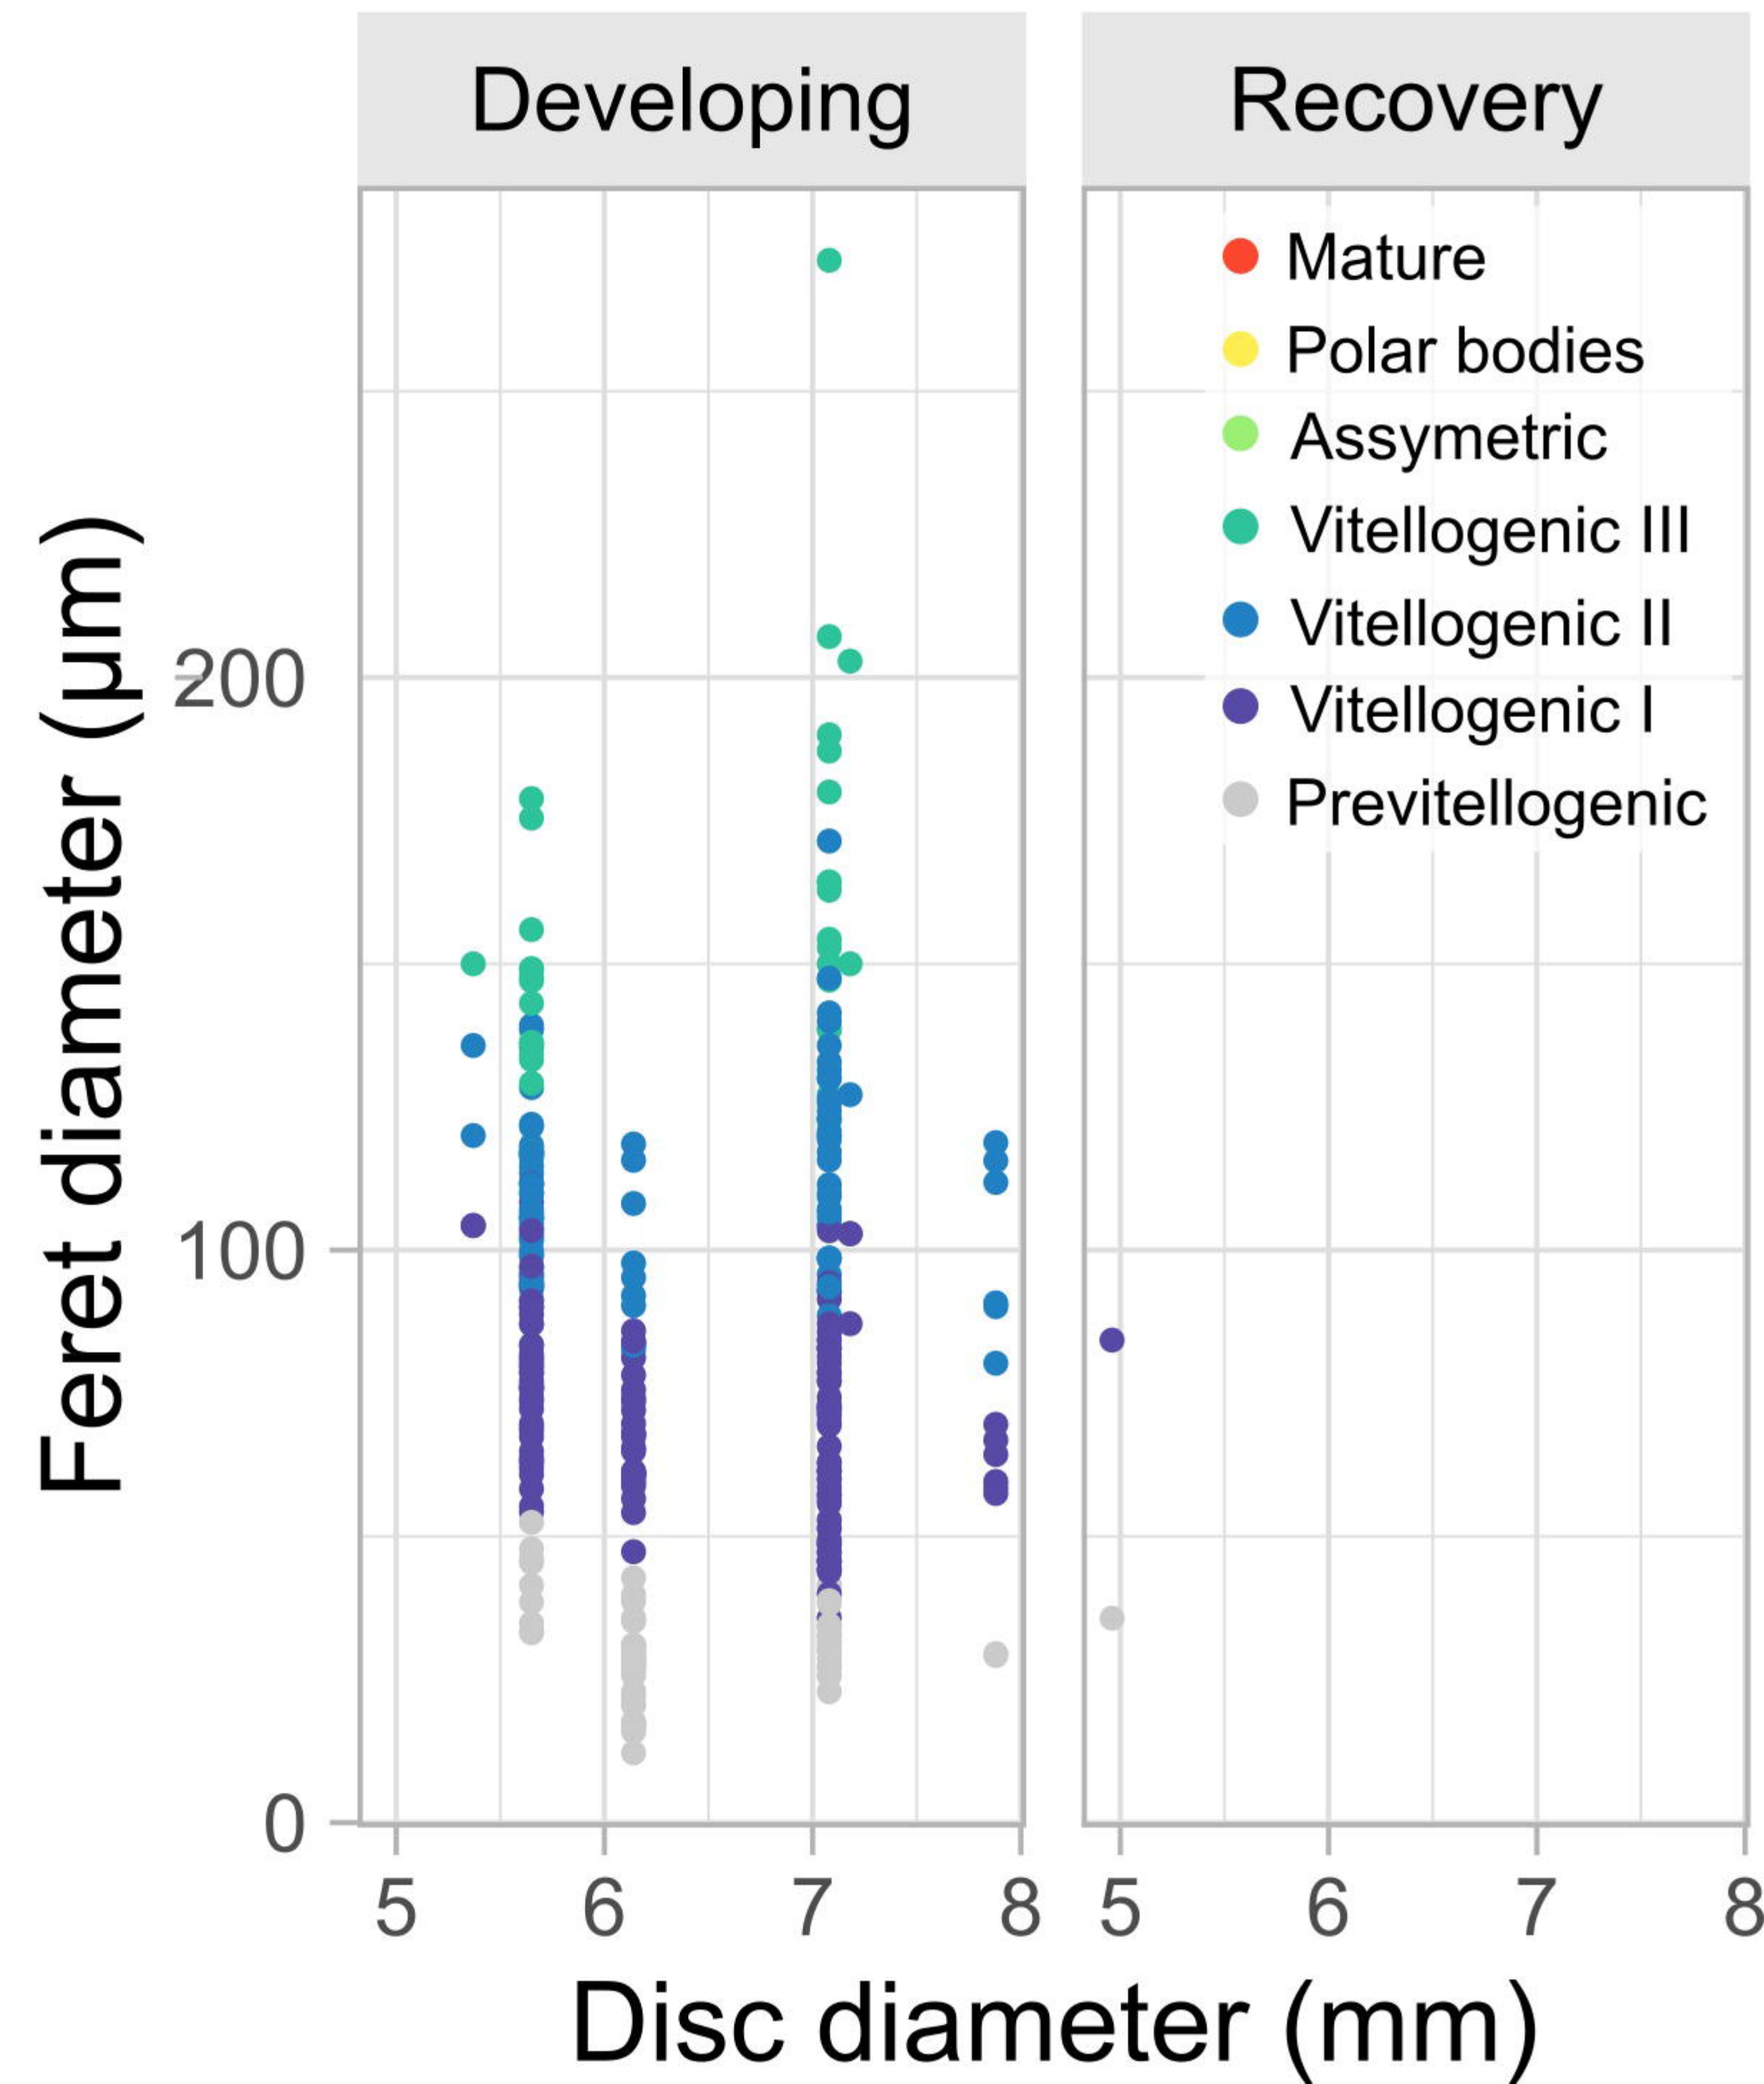

bioRxiv preprint doi: <https://doi.org/10.1101/2021.02.06.428832>; this version posted March 25, 2021. The copyright holder for this preprint (which was not certified by peer review) is the author/funder, who has granted bioRxiv a license to display the preprint in perpetuity. It is made available under aCC-BY-NC-ND 4.0 International license.

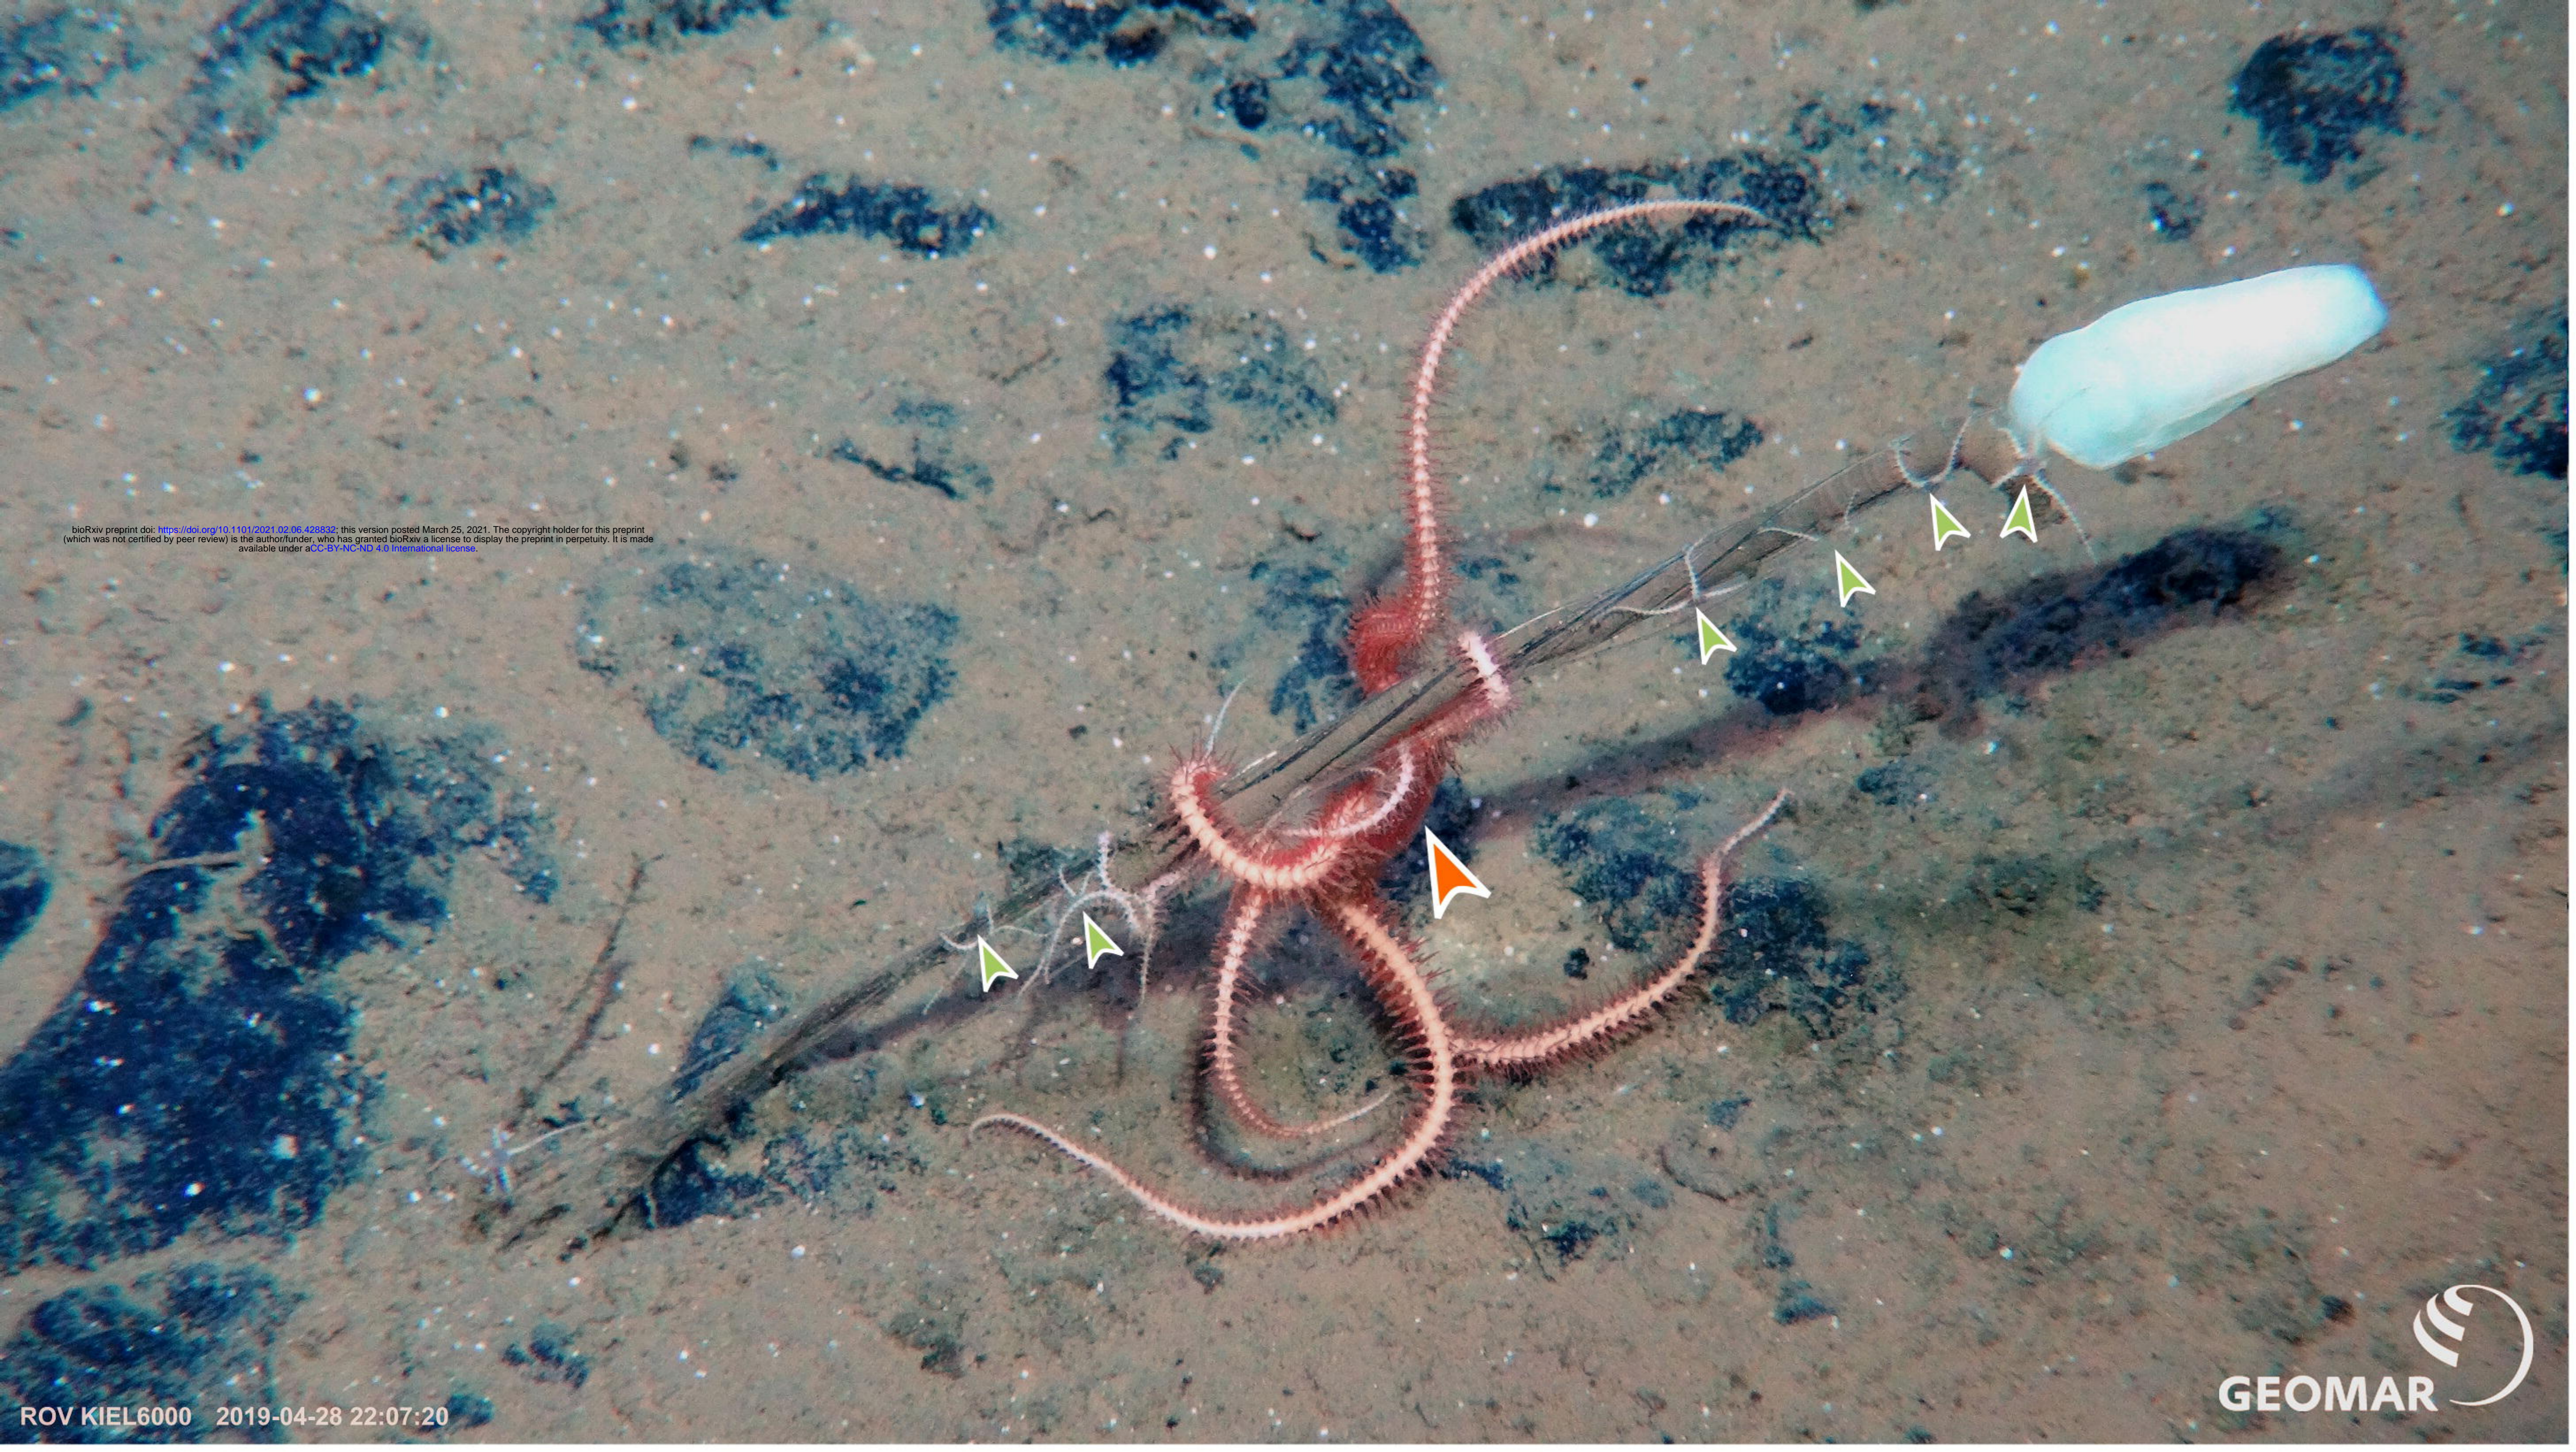

Source: https://www.biorxiv.org/content/10.1101/2021.02.06.428832v2.full.pdf
